# Supplementary material for: Correlation between perioperative parecoxib use and postoperative acute kidney injury in patients undergoing non-cardiac surgery: a retrospective cohort analysis
Source: PubMed Central journal article supplement — BMJ Open. 2021 Aug 24;11(8):e047840. doi: 10.1136/bmjopen-2020-047840 (PMC8388276; doi:10.1136/bmjopen-2020-047840), 2021-08-24
Supplement: bmjopen-2020-047840.draft_revisions.pdf [file bmjopen-2020-047840.draft_revisions.pdf]

# BMJ Open

BMJ Open is committed to open peer review. As part of this commitment we make the peer review history of every article we publish publicly available.

When an article is published we post the peer reviewers' comments and the authors' responses online. We also post the versions of the paper that were used during peer review. These are the versions that the peer review comments apply to.

The versions of the paper that follow are the versions that were submitted during the peer review process. They are not the versions of record or the final published versions. They should not be cited or distributed as the published version of this manuscript.

BMJ Open is an open access journal and the full, final, typeset and author-corrected version of record of the manuscript is available on our site with no access controls, subscription charges or pay-per-view fees (<http://bmjopen.bmj.com>).

If you have any questions on BMJ Open's open peer review process please email [info.bmjopen@bmj.com](mailto:info.bmjopen@bmj.com)

# BMJ Open

## Correlation between perioperative parecoxib use and postoperative acute kidney injury in patients undergoing non-cardiac surgery: A retrospective cohort analysis

|                               |                                                                                                                                                                                                                                                                                                                                                                                                                                                                                                                                                                                                                                                 |
|-------------------------------|-------------------------------------------------------------------------------------------------------------------------------------------------------------------------------------------------------------------------------------------------------------------------------------------------------------------------------------------------------------------------------------------------------------------------------------------------------------------------------------------------------------------------------------------------------------------------------------------------------------------------------------------------|
| Journal:                      | <i>BMJ Open</i>                                                                                                                                                                                                                                                                                                                                                                                                                                                                                                                                                                                                                                 |
| Manuscript ID                 | bmjopen-2020-047840                                                                                                                                                                                                                                                                                                                                                                                                                                                                                                                                                                                                                             |
| Article Type:                 | Original research                                                                                                                                                                                                                                                                                                                                                                                                                                                                                                                                                                                                                               |
| Date Submitted by the Author: | 14-Dec-2020                                                                                                                                                                                                                                                                                                                                                                                                                                                                                                                                                                                                                                     |
| Complete List of Authors:     | Tang, Yong-Zhong; Central South University Third Xiangya Hospital, Anesthesiology<br>Zeng, Pingping; Central South University Third Xiangya Hospital, Department of Anesthesiology<br>Liao, Yan; Central South University Third Xiangya Hospital, Department of Anesthesiology<br>Qin, Zheng; Hunan University College of Computer Science and Electronic Engineering<br>Zhang, Hao; Institute of Microelectronics of Chinese Academy of Sciences<br>Li, Bo; Central South University Third Xiangya Hospital<br>Ouyang, Wen; Central South University Third Xiangya Hospital<br>li, dan; Central South University, Department of Anesthesiology |
| Keywords:                     | Adult anaesthesia < ANAESTHETICS, Acute renal failure < NEPHROLOGY, Pain management < ANAESTHETICS                                                                                                                                                                                                                                                                                                                                                                                                                                                                                                                                              |
|                               |                                                                                                                                                                                                                                                                                                                                                                                                                                                                                                                                                                                                                                                 |

SCHOLARONE™  
Manuscripts

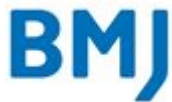

I, the Submitting Author has the right to grant and does grant on behalf of all authors of the Work (as defined in the below author licence), an exclusive licence and/or a non-exclusive licence for contributions from authors who are: i) UK Crown employees; ii) where BMJ has agreed a CC-BY licence shall apply, and/or iii) in accordance with the terms applicable for US Federal Government officers or employees acting as part of their official duties; on a worldwide, perpetual, irrevocable, royalty-free basis to BMJ Publishing Group Ltd ("BMJ") its licensees and where the relevant Journal is co-owned by BMJ to the co-owners of the Journal, to publish the Work in this journal and any other BMJ products and to exploit all rights, as set out in our [licence](#).

The Submitting Author accepts and understands that any supply made under these terms is made by BMJ to the Submitting Author unless you are acting as an employee on behalf of your employer or a postgraduate student of an affiliated institution which is paying any applicable article publishing charge ("APC") for Open Access articles. Where the Submitting Author wishes to make the Work available on an Open Access basis (and intends to pay the relevant APC), the terms of reuse of such Open Access shall be governed by a Creative Commons licence – details of these licences and which [Creative Commons](#) licence will apply to this Work are set out in our licence referred to above.

Other than as permitted in any relevant BMJ Author's Self Archiving Policies, I confirm this Work has not been accepted for publication elsewhere, is not being considered for publication elsewhere and does not duplicate material already published. I confirm all authors consent to publication of this Work and authorise the granting of this licence.

---

1 **Correlation between perioperative parecoxib use and postoperative acute kidney**  
2 **injury in patients undergoing non-cardiac surgery: A retrospective cohort analysis**

3

4 Yongzhong Tang, M.D.<sup>1</sup>, Pingping Zeng, M.D.<sup>1</sup>, Yan Liao, M.D.<sup>1</sup>, Zheng Qin, Ph.D.<sup>2</sup>,  
5 Hao Zhang, Ph.D.<sup>3</sup>, Bo Li, M.D.<sup>4</sup>, Wen Ouyang, Ph.D.<sup>1</sup>, and Dan Li, Ph.D.<sup>1\*</sup>

6 <sup>1</sup> Department of Anesthesiology, The Third Xiangya Hospital, Central South University,  
7 Changsha, China

8 <sup>2</sup> College of Computer Science and Electronic Engineering, Hunan University, Changsha,  
9 China

10 <sup>3</sup> Institute of Microelectronics of Chinese of Science, Beijing, China

11 <sup>4</sup>Operation Room, The Third Xiangya Hospital, Central South University, Changsha,  
12 China

13

14 **Corresponding author:** Dan Li, Department of Anesthesiology, The Third Xiangya  
15 Hospital, Central South University, 138 Tongzipo Road, Changsha, Hunan , 410013,  
16 China

17 Tel: +8613574871720, Fax: +8673188618151, E-mail: [danfuer623@163.com](mailto:danfuer623@163.com)

18

---

1  
2  
3  
4 19 **Abstract**

5  
6 20 **Objective:** The association of nonsteroidal anti-inflammatory drugs with postoperative acute kidney  
7  
8  
9 21 injury is controversial. However, there are few studies focusing on the association between parecoxib  
10  
11  
12 22 and postoperative acute kidney injury.

13  
14 23 **Design:** A retrospective cohort study

15  
16  
17 24 **Setting:** Third Xiangya Hospital of Central South University in Hunan Province, China

18  
19 25 **Participants:** The electronic medical records and laboratory results were obtained from 9,246 adult  
20  
21  
22 26 patients (18–60 years) undergoing non-cardiac surgery performed between January 1, 2012 to August  
23  
24  
25 27 31, 2017. Study groups were treated with or without parecoxib.

26  
27 28 **Interventions:** Univariable analysis identified demographic, preoperative laboratory, and  
28  
29  
30 29 intraoperative factors associated with acute kidney injury. Logistic stepwise regression was used to  
31  
32  
33 30 calculate the adjusted odds ratio of parecoxib and acute kidney injury association.

34  
35 31 **Results:** The incidence of postoperative acute kidney injury was 6.06% and parecoxib was used in  
36  
37  
38 32 10.5% of the patients. The mortality was 4.64% in the acute kidney injury group. The incidence of  
39  
40  
41 33 acute kidney injury was lower in the parecoxib-administered group (4%) than that in the group without  
42  
43  
44 34 parecoxib (6.3%,  $p = 0.005$ ). Postoperative acute kidney injury risk reduced by 39% in the parecoxib-  
45  
46  
47 35 administered group after adjusting for interference factors.

48 36 **Conclusions:** Thus, parecoxib might have potential protective effects against postoperative acute  
49  
50  
51 37 kidney injury risk in adult patients undergoing non-cardiac surgery.

52  
53 38

54  
55  
56 39 **Keywords:** acute kidney injury; parecoxib; non-cardiac surgery

57  
58  
59 40  
60

1  
2  
3  
4 41 **Strengths and limitations of this study:** Large study population including all adult patients (18–60  
5  
6 42 years) undergoing non-cardiac surgery in Third Xiangya Hospital of Central South University in China  
7  
8  
9 43 between 2012 to 2017.□

10  
11 44 □ Our study indicated that parecoxib might have potential protective effects against postoperative  
12  
13  
14 45 acute kidney injury risk.

15  
16  
17 46 This retrospective single-center observational study may have had some selection bias, and the  
18  
19 47 timing of the serum creatinine measurement may vary with different doctors.  
20  
21  
22  
23  
24  
25  
26  
27  
28  
29  
30  
31  
32  
33  
34  
35  
36  
37  
38  
39  
40  
41  
42  
43  
44  
45  
46  
47  
48  
49  
50  
51  
52  
53  
54  
55  
56  
57  
58  
59  
60

---

## 48 **Background**

49 Acute kidney injury (AKI), a long-recognized complication of surgery with a high  
50 incidence of morbidity and mortality, increases health care costs and length of hospital  
51 stay [1-3]. Even in patients undergoing non-cardiac surgery with low-grade American  
52 Society of Anesthesiologists (ASA) physical status such as ASA I–II, the incidence of  
53 postoperative AKI can reach 6% [4]. Mild kidney injury, such as a small increase in  
54 postoperative serum creatinine, is associated with renal dysfunction for as long as 1 to 2  
55 years after surgery [5].

56 Nonsteroidal anti-inflammatory drugs (NSAIDs) are commonly used perioperative  
57 anesthetic adjuvants, with anti-inflammatory and analgesic effects. The main mechanism  
58 of action of NSAIDs is the inhibition of cyclooxygenase (COX) enzymes, which can  
59 ultimately result in the reduction of prostanoids and thromboxane [6]. COX exists in two  
60 forms: COX-1, which is present in most body tissues body including the stomach and  
61 intestines and COX-2, which is primarily found at sites of inflammation [7].  
62 Accumulating evidence suggests that traditional NSAIDs, such as aspirin and ibuprofen,  
63 are associated with acute and chronic gastrointestinal bleeding and kidney disease [8, 9].  
64 These NSAIDs are nonselective COX (COX-1 and COX-2) inhibitors and their side  
65 effects are mostly COX-1 related.

66 Parecoxib is a parenteral specific COX-2 inhibitor, which enhances its therapeutic gain  
67 with minimal adverse effects [6, 10]. Parecoxib is used as a perioperative analgesic in  
68 over 80 countries, however, clinical data about effect of parecoxib on postoperative AKI  
69 are scarce. Therefore, it is important to establish its safety during the perioperative period.

70 The aim of this study was to assess the correlation between the perioperative use of  
71 parecoxib and postoperative AKI in patients undergoing non-cardiac surgery.

72

## 73 **Methods**

### 74 Design and selection criteria

75 This retrospective study was performed at the Third Xiangya Hospital of Central South  
76 University from January 1, 2012, to August 31, 2017. The inclusion criterion was patients  
77 aged 18–60 years who underwent non-cardiac surgery. The exclusion criteria were ASA  
78 grade VI, administration of local anesthesia, liver transplantation, cardiac surgery,  
79 urological surgery (including kidney transplantation), lack of serum creatinine or  
80 covariate data, and preoperative combined CKD, defined as estimate glomerular filtration  
81 rate (eGFR)  $<60 \text{ mL} \cdot \text{min}^{-1} \cdot 1.73\text{m}^{(2)}^{-1}$ ,  $\geq 3$  months). Parecoxib doses larger than 80 mg  
82 were not included because the routine dose is not more than 80 mg/day based on the drug  
83 instructions. The study was approved by the Ethics Committee of the Third Xiangya  
84 Hospital of Central South University (approval number 2020S264) that waived the need  
85 for informed consent because of the observational nature of the study.

86

### 87 Data collection

88 The following information was collected: 1) epidemiological data including age, sex,  
89 and BMI; 2) individual history including preoperative complications and medication  
90 history; 3) laboratory data including serum creatinine and eGFR calculated using the  
91 Chronic Kidney Disease Epidemiology Collaboration (CKD-EPI) formula; 4)



1  
2  
3  
4 92 intraoperative data including emergency, surgical grade, operative time, anesthesia  
5  
6 93 method, ASA grade, amount of fluid infusion and out, intraoperative erythrocyte  
7  
8  
9 94 transfusion volume, amount of blood loss, intraoperative hypotension and vasoactive  
10  
11 95 drugs. 5) postoperative outcomes such as occurrence of AKI, admission to ICU, and  
12  
13  
14 96 mortality. All clinical data of the 9,246 patients who underwent non-cardiac surgery were  
15  
16  
17 97 obtained by a retrospective review of the computerized patient record system of our  
18  
19 98 hospital.

20  
21  
22 99

## 23 24 25 100 Definitions

26  
27 101 Postoperative AKI was defined according to the Kidney Disease: Improving Global  
28  
29  
30 102 Outcomes (KDIGO) 2012 creatinine criteria [11], as one of the following: an increase in  
31  
32 103 serum creatinine by  $\geq 0.3$  mg/dL within 48 h or a  $\geq 1.5$ -times increase in serum creatinine  
33  
34  
35 104 from baseline within 7 postoperative days. The baseline serum creatinine level was  
36  
37  
38 105 calculated using the lowest level at preoperative day 7. The primary outcome was the  
39  
40 106 impact of parecoxib on AKI, defined as AKI occurring within 7 postoperative days.  
41  
42  
43 107 Parecoxib administration was defined during the operative time. Surgical grade was  
44  
45  
46 108 classified using the surgical classification catalogue constituted by the Chinese Ministry  
47  
48 109 of Health, published in 2018. Intraoperative hypotension was defined as mean arterial  
49  
50  
51 110 pressure (MAP)  $< 65$  mmHg for a duration of at least 5 min.

52  
53 111

## 54 55 56 112 Patient and public involvement

57  
58 113 No patient involvement.  
59  
60

114

115 **Statistical analysis**

116 All statistical analyses were performed using SAS version 9.4 software (SAS  
117 Institute, Inc., Cary, NC, USA) and CRAN R (v3.4.3). Missing data of covariates were  
118 handled by multiple imputation model. The continuous results are expressed as  
119 mean(SD), whereas categorical variables are expressed as numbers with percentages.  
120 The Kruskal-Wallis rank sum test was used to compare continuous variables between  
121 groups, whereas the chi-square ( $\chi^2$ ) test or Fisher's exact probability method was used  
122 for categorical variables. Univariable logistic regression analysis was used to identify  
123 epidemiological, preoperative laboratory, and intraoperative factors that were  
124 significantly associated with AKI development. The data were adjusted for potential  
125 confounders in multivariable regression models. In addition, the sensitivity test  
126 or subgroup analysis were performed. The results of the classification variable are  
127 expressed as odds ratio (OR) or "Beta" and 95% CI; a p-value < 0.05 indicated a  
128 statistically significant difference.

129

130 **Results**

131 Of the 108,198 records identified, those of 9,246 patients were included in the analysis  
132 (Fig. 1). Reasons for excluding patients were age <18 or >60 years (n = 4,783), ASA  
133 grade VI (n = 13), exposure to local anesthesia (n = 12,054), cardiac surgery (n = 387),  
134 urological surgery including kidney transplantation (n = 3,589), liver transplantation (n =  
135 107), no recorded preoperative or postoperative creatinine data (n=73,093), no recorded

136 covariate data such as routine blood panel or infusion volume (n = 4,114), preoperative  
 137 chronic kidney disease (CKD) (n = 472), and administration of parecoxib doses >80 mg  
 138 (n = 340).

139

140 AKI

141 The incidence of postoperative AKI was 6.06% (560/9,246). In the AKI group, the  
 142 probability of admission to the intensive care unit (ICU) and mortality were 10.18% and  
 143 4.64%, respectively (Table 1).

144

145 **Table 1.** Baseline characteristics of patients aged 18–60 years with and without acute  
 146 kidney injury (AKI)

| Clinical features   | without AKI<br>(n=8686) | With AKI<br>(n=560) | p-value |
|---------------------|-------------------------|---------------------|---------|
| Age (years)         | 44.25±10.43             | 45.06±10.18         | 0.074   |
| BMI                 | 22.93±4.93              | 22.54±3.83          | 0.07    |
| eGFR                | 101.98±16.38            | 94.41±19.78         | <0.001  |
| Male                | 4267 (49.13%)           | 300 (53.57%)        | 0.041   |
| Smoking             | 1213 (13.97%)           | 105 (18.75%)        | 0.002   |
| Alcohol consumption | 822 (9.46%)             | 74 (13.21%)         | 0.004   |
| Anemia              | 1538 (17.71%)           | 161 (28.75%)        | <0.001  |
| Hypertension        | 1884 (21.69%)           | 211 (37.68%)        | <0.001  |

|                       |               |              |        |
|-----------------------|---------------|--------------|--------|
| Diabetes mellitus     | 509 (5.86%)   | 52 (9.29%)   | <0.001 |
| ACEI                  | 189 (2.18%)   | 21 (3.75%)   | 0.015  |
| ARB                   | 116 (1.34%)   | 13 (2.32%)   | 0.054  |
| CCB                   | 1125 (12.95%) | 119 (21.25%) | <0.001 |
| Diuretics             | 77 (0.89%)    | 19 (3.39%)   | <0.001 |
| ASA grade             |               |              | <0.001 |
| I-II                  | 6633 (76.36%) | 317 (56.61%) |        |
| III-V                 | 2053 (23.64%) | 243 (43.39%) |        |
| Anesthesia method     |               |              | <0.001 |
| General anesthesia    | 7735 (89.05%) | 531 (94.82%) |        |
| No general anesthesia | 951 (10.95%)  | 29 (5.18%)   |        |
| Emergency             | 1395 (16.06%) | 130 (23.21%) | <0.001 |
| Surgical Grade        |               |              | <0.001 |
| 1                     | 245 (2.82%)   | 14 (2.50%)   |        |
| 2                     | 2746 (31.61%) | 118 (21.07%) |        |
| 3                     | 5349 (61.58%) | 386 (68.93%) |        |
| 4                     | 346 (3.98%)   | 42 (7.50%)   |        |
| Operative time (min)  |               |              | <0.001 |
| ≤60                   | 1338 (15.4%)  | 63 (11.25%)  |        |
| 61-120                | 2176 (25.05%) | 111 (19.82%) |        |
| 121-180               | 2032 (23.39%) | 135 (24.11%) |        |
| >180                  | 3140 (36.15%) | 251 (44.82%) |        |

|                            |                        |  |                  |        |
|----------------------------|------------------------|--|------------------|--------|
| Intraoperative erythrocyte |                        |  |                  |        |
| Transfusion, mL (%)        |                        |  |                  | <0.001 |
| <100                       | 6735 (77.54)           |  | 339 (60.54)      |        |
| 100–600                    | 868 (9.99)             |  | 82 (14.64)       |        |
| 601–1000                   | 508 (5.85)             |  | 42 (7.50)        |        |
| >1000                      | 575 (6.62)             |  | 97 (17.32)       |        |
| Amount of Blood loss, mL   |                        |  |                  |        |
| (%)                        |                        |  |                  | <0.001 |
| <100                       | 2623 (30.20)           |  | 131 (23.39)      |        |
| 100–600                    | 4771 (54.93)           |  | 292 (52.14)      |        |
| 601–1000                   | 670 (7.71)             |  | 60 (10.71)       |        |
| >1000                      | 622 (7.16)             |  | 77 (13.75)       |        |
| Amount of fluid infusion   | 916.67 (625.00–        |  | 1125.00 (703.12– |        |
| (10 mL/24 h)               | 1432.29)               |  | 1604.17)         | <0.001 |
| Amount of fluid out        |                        |  | 375.00 (208.33–  |        |
| (10 mL/24 h)               | 333.33 (145.83–541.67) |  | 687.50)          | <0.001 |
| Intraoperative Hypotension | 930 (10.71%)           |  | 81 (14.46%)      | 0.006  |
| Vasoactive drugs           | 664 (7.64%)            |  | 71 (12.68%)      | <0.001 |
| Parecoxib                  | 934 (10.75%)           |  | 39 (6.96%)       | 0.005  |
| Admission to ICU           | 376 (4.33%)            |  | 57 (10.18%)      | <0.001 |
| Death                      | 32 (0.37%)             |  | 26 (4.64%)       | <0.001 |

148 AKI: acute kidney injury, BMI: body mass index, eGFR: estimated glomerular filtration rate, ACEI:  
 149 angiotensin-converting enzyme inhibitors, ARB: angiotensin receptor blockers, CCB: calcium-  
 150 channel blockers, ASA: American Society of Anesthesiologists, ICU, intensive care unit. Data are  
 151 expressed as number of patients (%) or mean  $\pm$  standard deviation (SD).

152  
 153 There was no difference in age, body mass index (BMI), angiotensin receptor blockers  
 154 (ARBs) use and intraoperative hypotension among patients with and without AKI (Table  
 155 1). Significant differences between patients with AKI and without AKI are shown in  
 156 Table 1 (all  $p < 0.05$ ).

#### 158 Parecoxib

159 Parecoxib was used in 10.5% (973/9,246) of patients (Table 2).

161 Table 2. Baseline characteristics of patients aged 18–60 years treated with and without  
 162 parecoxib

| Clinical features | Without parecoxib<br>(n=8273) | With parecoxib<br>(n=973) | p-value |
|-------------------|-------------------------------|---------------------------|---------|
| Age (year)        | 44.23 $\pm$ 10.46             | 44.89 $\pm$ 10.04         | 0.06    |
| BMI               | 22.89 $\pm$ 4.99              | 23.03 $\pm$ 3.76          | 0.409   |
| eGFR              | 101.66 $\pm$ 16.66            | 101.56 $\pm$ 16.23        | 0.858   |
| Male              | 4062 (49.1%)                  | 508 (52.2%)               | 0.063   |

|                       |              |             |        |
|-----------------------|--------------|-------------|--------|
| Smoking               | 1175 (14.2%) | 146 (15%)   | 0.479  |
| Alcohol consumption   | 811 (9.8%)   | 89 (9.1%)   | 0.544  |
| Anemia                | 1547 (18.7%) | 152 (15.6%) | 0.019  |
| Hypertension          | 1903 (23%)   | 189(19.4%)  | 0.011  |
| Diabetes mellitus     | 505 (6.1%)   | 56 (5.8%)   | 0.666  |
| ACEI                  | 199 (2.4%)   | 14 (1.4%)   | 0.065  |
| ARB                   | 116 (1.4%)   | 14 (1.4%)   | 0.902  |
| CCB                   | 1142 (13.8%) | 103 (10.6%) | 0.006  |
| Diuretics             | 91 (1.1%)    | 8 (0.8%)    | 0.482  |
| ASA grade             |              |             | 0.09   |
| I-II                  | 6196 (74.9%) | 753 (77.4%) |        |
| III-V                 | 2077 (25.1%) | 220 (22.6%) |        |
| Anesthesia method     |              |             | <0.001 |
| General anesthesia    | 7363 (89%)   | 907 (93.2%) |        |
| No general anesthesia | 910 (11%)    | 66 (6.8%)   |        |
| Emergency             | 1406 (17%)   | 119 (12.2%) | <0.001 |
| Surgical grade        |              |             | <0.001 |
| 1                     | 240 (2.9%)   | 19 (2%)     |        |
| 2                     | 2623 (31.7%) | 243 (25%)   |        |
| 3                     | 5080 (61.4%) | 656 (67.4%) |        |
| 4                     | 330 (4%)     | 55 (5.7%)   |        |
| Operative time (min)  |              |             | <0.001 |

|                                                   |                |                |        |
|---------------------------------------------------|----------------|----------------|--------|
| ≤60                                               | 1315 (15.9%)   | 88 (9%)        |        |
| 61–120                                            | 2085 (25.2%)   | 204 (21%)      |        |
| 121–180                                           | 1919 (23.2%)   | 246 (25.3%)    |        |
| >180                                              | 2954 (35.7%)   | 435 (44.7%)    |        |
| Intraoperative erythrocyte<br>Transfusion, mL (%) |                |                | 0.94   |
| <100                                              | 6329 (76.5%)   | 744 (76.5%)    |        |
| 100–600                                           | 852 (10.3%)    | 98 (10.1%)     |        |
| 601–1000                                          | 496 (6%)       | 56 (5.8%)      |        |
| >1000                                             | 596 (7.2%)     | 75 (7.7%)      |        |
| Amount of Blood loss, mL<br>(%)                   |                |                | 0.003  |
| <100                                              | 2507 (30.3%)   | 251 (25.8%)    |        |
| 100–600                                           | 4500 (4.4%)    | 559 (57.5%)    |        |
| 601–1000                                          | 662 (8%)       | 70 (7.2%)      |        |
| >1000                                             | 604 (7.3%)     | 93 (9.6%)      |        |
| Intraoperative Hypotension                        | 10.8           | 11.9           | 0.297  |
| Vasoactive drugs                                  | 7.8            | 8.9            | 0.227  |
| Amount of fluid infusion<br>(10 mL/24 h)          | 1037.07±565.54 | 1159.31±579.85 | <0.001 |
| Amount of fluid out                               | 410.17±374.16  | 373.74±334.53  | 0.004  |



| (10 mL/24 h) |            |         |       |
|--------------|------------|---------|-------|
| AKI          | 521 (6.3%) | 39 (4%) | 0.005 |
| AKI.RANK     |            |         | 0.013 |
| 0            | 93.7       | 96      |       |
| 1            | 4.5        | 2.6     |       |
| 2            | 1.8        | 1.4     |       |

163 BMI: body mass index, eGFR: estimated glomerular filtration rate, ACEI: angiotensin-converting  
 164 enzyme inhibitors, ARB: angiotensin receptor blockers, CCB: calcium-channel blockers, ASA:  
 165 American Society of Anesthesiologists, AKI: acute kidney injury. Data are expressed as number of  
 166 patients (%) or mean  $\pm$  standard deviation (SD).

167

168 The incidence of AKI was lower in the parecoxib-administered group (4%) than in the  
 169 group without parecoxib (6.3%,  $p = 0.005$ ). There was no difference in age, BMI,  
 170 estimated glomerular filtration rate (eGFR), sex, smoking, alcohol consumption, presence  
 171 of diabetes mellitus, use of angiotensin-converting enzyme inhibitors (ACEIs), ARBs, or  
 172 diuretics, ASA grade, incidence of intraoperative erythrocyte transfusion and  
 173 intraoperative hypotension, and use of vasoactive drugs between patients treated with and  
 174 without parecoxib (Table 2). Significant differences between patients treated with and  
 175 without parecoxib are shown in Table 2 (all  $p < 0.05$ ).

176

177 Univariable analysis

178 The factors shown by the univariable analysis to influence AKI development in patients

179 aged 18–60 years who underwent non-cardiac surgery are listed in Table 3.

180

181 Table 3. Univariable analysis of acute kidney injury (AKI)

| Variable              | Statistics    | Univariable       |         |
|-----------------------|---------------|-------------------|---------|
|                       |               | OR (95% CI)       | p-value |
| Parecoxib             | 0.11± 0.31    | 0.62 (0.45, 0.87) | 0.0050  |
| Age (year)            | 44.30 ± 10.42 | 1.01 (1.00, 1.02) | 0.0737  |
| Male                  | 4567 (49.39%) | 1.19 (1.01, 1.42) | 0.0416  |
| BMI                   | 22.90 ± 4.87  | 0.98 (0.95, 1.00) | 0.0396  |
| Smoking               | 1318 (14.25%) | 1.42 (1.14, 1.77) | 0.0018  |
| Alcohol consumption   | 896 (9.69%)   | 1.46 (1.13, 1.88) | 0.0038  |
| Anemia                | 1699 (18.38%) | 1.88 (1.55, 2.27) | <0.0001 |
| Hypertension          | 2095 (22.66%) | 2.18 (1.83, 2.61) | <0.0001 |
| Diabetes mellitus     | 561 (6.07%)   | 1.64 (1.22, 2.22) | 0.0011  |
| ACEI                  | 210 (2.27%)   | 1.75 (1.11, 2.77) | 0.0167  |
| ARB                   | 129 (1.40%)   | 1.76 (0.98, 3.14) | 0.0570  |
| CCB                   | 1244 (13.45%) | 1.81 (1.47, 2.24) | <0.0001 |
| Diuretics             | 96 (1.04%)    | 3.93 (2.36, 6.54) | <0.0001 |
| eGFR                  | 97.94±22.36   | 0.96 (0.96, 0.97) | <0.0001 |
| ASA grade III–V       | 2296 (24.83%) | 2.48 (2.08, 2.95) | <0.0001 |
| No general anesthesia | 980 (10.60%)  | 0.44 (0.30, 0.65) | <0.0001 |
| Emergency             | 1525 (16.49%) | 1.58 (1.29, 1.94) | <0.0001 |

|                                                |               |                   |         |
|------------------------------------------------|---------------|-------------------|---------|
| Surgical grade 4                               | 388 (4.20%)   | 2.12 (1.14, 3.98) | 0.0184  |
| Operative time (min)                           |               |                   |         |
| ≤60                                            | 1401 (15.15%) | 1                 |         |
| 61–120                                         | 2287 (24.74%) | 1.08 (0.79, 1.49) | 0.6200  |
| 121–180                                        | 2167 (23.44%) | 1.41 (1.04, 1.92) | 0.0279  |
| >180                                           | 3391 (36.68%) | 1.70 (1.28, 2.25) | 0.0003  |
| Intraoperative Hypotension                     | 1011 (10.93%) | 1.41 (1.10, 1.80) | 0.0060  |
| Vasoactive drugs                               | 735 (7.95%)   | 0.06 (0.03, 0.09) | <0.0001 |
| Intraoperative erythrocyte transfusion, mL (%) |               |                   |         |
| <100                                           | 7074 (76.51%) | 1                 |         |
| 100–600                                        | 950 (10.27%)  | 1.88 (1.46, 2.41) | <0.0001 |
| 601–1000                                       | 550 (5.95%)   | 1.64 (1.18, 2.29) | 0.0035  |
| >1000                                          | 672 (7.27%)   | 3.35 (2.63, 4.27) | <0.0001 |
| Amount of Blood loss, mL (%)                   |               |                   |         |
| <100                                           | 2754 (29.79%) | 1                 |         |
| 100–600                                        | 5063 (54.76%) | 1.23 (0.99, 1.51) | 0.0596  |
| 601–1000                                       | 730 (7.9%)    | 1.79 (1.31, 2.46) | 0.0003  |
| >1000                                          | 699 (7.56%)   | 2.48 (1.85, 3.33) | <0.0001 |

182 OR: odds ratio, BMI: body mass index, ACEI: angiotensin-converting enzyme inhibitors, ARB:

183 angiotensin receptor blockers, CCB: calcium-channel blockers, ASA: American Society of

184 Anesthesiologists.

185

186 In the univariable analysis, male sex, smoking, alcohol consumption, anemia,  
 187 hypertension, diabetes mellitus, ACEI use, calcium channel blocker (CCB) use, diuretic  
 188 use, ASA grade III–V, emergency, surgical grade 4, duration of the operation, incidence  
 189 of intraoperative hypotension and erythrocyte transfusion, and amount of blood loss were  
 190 independently associated with an increased risk of postoperative AKI (Table 3).

191 Parecoxib (OR, 0.62; 95%CI, 0.45–0.87,  $p = 0.005$ ), eGFR (OR, 0.96; 95%CI, 0.96–  
 192 0.97,  $p < 0.0001$ ), no general anesthesia (OR, 0.44; 95%CI, 0.30–0.65,  $p < 0.0001$ ) and  
 193 vasoactive drug use (OR, 0.06; 95%CI, 0.03–0.09,  $p < 0.0001$ ) were independently  
 194 associated with a decreased risk of postoperative AKI (Table 3). Age (OR, 1.01; 95%CI,  
 195 1.00–1.02,  $p = 0.0737$ ), BMI (OR, 0.98; 95%CI, 0.95–1.00,  $p = 0.0396$ ), and ARB use  
 196 (OR, 1.76; 95%CI, 0.98–3.14,  $p = 0.0570$ ) were not correlated with AKI (Table 3).

197

198 Multivariable regression analysis

199 The occurrence of postoperative AKI was regarded as a dependent variable, and the  
 200 administration of parecoxib, an independent variable when we performed the stepwise  
 201 regression analysis (Table 4).

202

203 Table 4 Odds ratio of postoperative acute kidney injury (AKI) associated with parecoxib

---

| Non-adjusted: | Adjusted I: | Adjusted II: | Adjusted III: |
|---------------|-------------|--------------|---------------|
|---------------|-------------|--------------|---------------|

---

|             | Model 1           | Model 2           | Model 3           | Model 4          |
|-------------|-------------------|-------------------|-------------------|------------------|
| OR (95% CI) | 0.62 (0.45, 0.87) | 0.64 (0.46, 0.90) | 0.63 (0.44, 0.89) | 0.61(0.43, 0.87) |
| p-value     | 0.0050            | 0.0096            | 0.0095            | 0.0069           |

204 Model 1: Non-adjusted.

205 Model 2: Adjusted for age, sex, BMI, smoking, alcohol consumption, anemia, hypertension, diabetes  
 206 mellitus, ACEI, CCB, diuretics, ASA, anesthesia method, emergency, surgical grade, amount of fluid  
 207 infusion and out, intraoperative erythrocyte transfusion, and amount of blood loss.

208 Model 3: Model 2 plus ARB, eGFR, and operative time.

209 Model 4: Model 3 plus intraoperative hypotension, and vasoactive drugs.

210

211 The risk adjustment models were constructed using logistic stepwise regression. After  
 212 adjusting for these interference factors, parecoxib was still independently associated with  
 213 postoperative AKI (OR, 0.61; 95% CI, 0.43–0.87, model 4 in Table 4).

214

215 Sensitivity analysis

216 Table 5 shows the sensitivity analysis of postoperative AKI associated with parecoxib.

217

218 Table 5 Sensitivity analysis of association between postoperative acute kidney injury  
 219 (AKI) and parecoxib

|                         | Model 1 | Model 2 | Model 3 | Model 4 |
|-------------------------|---------|---------|---------|---------|
| Without                 |         |         |         |         |
| Parecoxib (40 or 80 mg) |         |         |         |         |

| parecoxib         |   |                      |                      |                      |                    |
|-------------------|---|----------------------|----------------------|----------------------|--------------------|
| <b>eGFR</b>       | 1 | 0.49 (0.31, 0.79)    | 0.54 (0.33, 0.87)    | 0.50 (0.30, 0.84)    | 0.49(0.29,0.82)    |
| <b>&lt;90</b>     |   | 0.0032               | 0.0119               | 0.0084               | 0.0065             |
| <b>Non-smoker</b> | 1 | 0.57 (0.39, 0.84)    | 0.56 (0.37, 0.84)    | 0.56 (0.38, 0.84)    | 0.55(0.37,0.83)    |
|                   |   | 0.0040               | 0.0046               | 0.0052               | 0.0043             |
| <b>AKI RANK</b>   | 0 | -0.03 (-0.05, -0.00) | -0.02 (-0.05, -0.00) | -0.02 (-0.04, -0.00) | -0.02(-0.04,-0.00) |
|                   |   | 0.0176               | 0.0283               | 0.0254               | 0.0271             |

**AKI RANK (outcome of postoperative AKI was divided into three groups: stage 0, no AKI; stage 1, AKI grade 1; stage 2, AKI grade 2 and 3)**

220 Model 1: Non-adjusted.

221 Model 2: Adjusted for age, sex, BMI, smoking, alcohol consumption, anemia, hypertension, diabetes  
 222 mellitus, ACEI, CCB, diuretics, ASA, anesthesia method, emergency, surgical grade, amount of fluid  
 223 infusion and out, intraoperative erythrocyte transfusion, and amount of blood loss.

224 Model 3: Model 2 plus ARB, eGFR, and operative time

225 Model 4: Model 3 plus intraoperative hypotension, and vasoactive drugs.

226  
 227 For patients with an eGFR  $<90 \text{ mL} \cdot \text{min}^{-1} \cdot 1.73 \text{ m}^{(2)}^{-1}$  or who were non-smokers, single-  
 228 dose parecoxib (40 mg or 80 mg) was associated with a lower incidence of postoperative  
 229 AKI. We divided the outcome of postoperative AKI into three groups: stage 0, no AKI;  
 230 stage 1, AKI grade 1; and stage 2, AKI grade 2 and 3. The results showed that parecoxib  
 231 exerted protective effects in postoperative AKI in differently ranked AKIs.

232

---

## 233 Discussion

234 According to the surgery type and AKI diagnostic criteria, the incidence of  
235 postoperative AKI ranges from 1.0% to 31% [12-14], and our study revealed an incidence  
236 of 6.06% in the study population of patients aged 18–60 years who underwent non-cardiac  
237 surgery. The incidence was similar to that in the recently published data by Nishimoto  
238 (6%, non-cardiac surgery; mean age, 63 years) [15]. In our study, the univariable analysis  
239 identified male sex, smoking, alcohol consumption, anemia, hypertension, diabetes  
240 mellitus, ACEI use, CCB use, diuretic use, eGFR, ASA grade III–V, anesthesia mode,  
241 emergency, surgical grade 4, duration of the operation (>120 min), incidence of  
242 intraoperative hypotension, intraoperative erythrocyte transfusion (>100 mL), amount of  
243 blood loss (>600 mL), and vasoactive drug use to be associated with AKI, some of which  
244 are similar to previously published data [16, 17].

245 However, age and BMI did not correlate with AKI in our study, which is inconsistent  
246 with the findings of previous studies [18]. This discrepancy can be explained by the  
247 difference in mean age and BMI between the studies, which were both lower in our study  
248 population. The results of the sensitivity analysis suggested that single-dose (40 mg or 80  
249 mg) parecoxib might have potential protective effects against postoperative AKI in  
250 differentially ranked AKI.

251 Numerous studies have investigated the association between NSAIDs and AKI [9, 19].  
252 An updated Cochrane systematic review and meta-analysis published in 2018 indicated  
253 that NSAIDs have uncertain effects on the rate of AKI and may slightly increase serum  
254 creatinine in patients with normal kidney function following surgery [19]. In another

1  
2  
3  
4 255 meta-analysis, a significant risk of AKI was observed with most traditional NSAIDs but  
5  
6 256 not with two COX-2 specific inhibitors (rofecoxib and celecoxib) [9]. A pooled analysis  
7  
8  
9 257 of 28 randomized clinical trials investigating the safety of parecoxib for the management  
10  
11 258 of postoperative pain showed that its associated risk of renal failure and impairment was  
12  
13  
14 259 1%, similar to that with the placebo (0.9%) [20].

16 260 However, our study indicated that intraoperative single-dose parecoxib (40 mg or 80  
17  
18 261 mg) might provide potential protective effects against postoperative AKI in patients aged  
19  
20 262 18–60 years who underwent non-cardiac surgery. Moreover, this is not the first time a  
21  
22 263 renoprotective effect has been postulated for parecoxib. For example, a study also showed  
23  
24 264 that a single-dose of parecoxib (20 mg/kg) reduced tubular renal injury and serum  
25  
26 265 inflammatory cytokines level (interleukin (IL)-1 $\alpha$ , IL- $\beta$ , IL6, and tumor necrosis factor  
27  
28 266 (TNF)- $\alpha$ ) in an ischemic rat model [21]. Moreover, several animal studies have suggested  
29  
30 267 that pretreatment with COX-2 inhibitors improved outcomes in function and histology in  
31  
32 268 not only the kidney but also other organs after ischemia [21, 22, 24]. To the best of our  
33  
34 269 knowledge, this is the first clinical report to suggest that single-dose (40 mg or 80 mg)  
35  
36 270 parecoxib may be renoprotective in patients aged 18–60 years who underwent non-  
37  
38 271 cardiac surgery.

39  
40 272 The mechanism by which parecoxib decreases the risk of postoperative AKI is  
41  
42 273 unknown. However, one possible underlying mechanism is likely related to inflammation.  
43  
44 274 A previous study showed that inflammation is a predictor of postoperative AKI and a  
45  
46 275 mediator of increased mortality after AKI in non-cardiac surgery [25]. However,  
47  
48 276 perioperative parecoxib reduced local and systemic inflammatory cytokines  
49  
50  
51  
52  
53  
54  
55  
56  
57  
58  
59  
60



1  
2  
3  
4 277 postoperatively [26, 27]. Another possible mechanism is associated with hemodynamic  
5  
6 278 change. COX-1 contributes to controlling renal GFR, whereas COX-2 is involved in  
7  
8  
9 279 sodium and water excretion [28]. COX-2 inhibitors are associated with mild hypertension  
10  
11 280 owing to modest sodium retention in the first few days of therapy [29]. The renoprotective  
12  
13  
14 281 mechanism of parecoxib may be related to its anti-inflammatory effects and sodium  
15  
16  
17 282 regulation.

18  
19 283 Our study had some limitations that are worth mentioning. First, this was a  
20  
21  
22 284 retrospective single-center observational study; thus, it may have had some selection bias.  
23  
24  
25 285 Second, the timing of the serum creatinine measurement was based on clinical discretion;  
26  
27 286 thus, it may vary with different doctors. Third, we simply chose patients aged 18-60 years  
28  
29  
30 287 who underwent non-cardiac surgery as the target to research, therefore, our results should  
31  
32  
33 288 be extrapolated cautiously.

34  
35 289

## 36 37 38 290 **Conclusions**

39  
40 291 In conclusion, in non-cardiac surgery patients, a single dose of parecoxib (40 mg or 80  
41  
42  
43 292 mg) may have potential protective effects against postoperative AKI in those aged 18–60  
44  
45  
46 293 years. However, these short-term effects may not represent the benefit of this drug in the  
47  
48  
49 294 long term. Furthermore, more comprehensive studies are needed to confirm the effects of  
50  
51 295 parecoxib on the risk of postoperative AKI.

52  
53 296

## 54 55 56 297 **Acknowledgments**

57  
58 298 We thank Dr. Xing Liu for technical consultation.  
59  
60

1  
2  
3  
4 299

5  
6 **300 Author's Contributions**

7  
8  
9 301 Yongzhong Tang helped in designing the study, analyzing and interpreting the data, and  
10  
11 302 drafting and revising the manuscript. Pingping Zeng and Yan Liao helped in collecting,  
12  
13  
14 303 analyzing and interpreting the data, and drafting and revising the manuscript. Zheng Qin,  
15  
16  
17 304 Hao Zhang and Bo Li helped in analyzing and interpreting the data. Wen Ouyang helped  
18  
19 305 in Supervising, Funding acquisition and drafting and revising the manuscript. Dan Li  
20  
21 306 helped in designing the study, analyzing and interpreting the data, and drafting and  
22  
23  
24 307 revising the manuscript.  
25

26  
27 308

28  
29  
30 **309 Funding:** This work was supported by the National Key R&D Program of China (grant  
31  
32 310 number 2018YFC2001800), Project of Health and Health Commission of Hunan  
33  
34 311 Province (grant number 20201802), Hunan Province Key Laboratory Project (grant  
35  
36  
37 312 number 2018TP1009), and the Research and Innovation Funds from Xiangya Bigdata  
38  
39  
40 313 Foundation of Central South University.  
41

42  
43 314

44  
45 **315 Competing interests:** The authors declare they have no competing interests.  
46

47  
48 316

49  
50 **317 Patient Consent for publication:** Not applicable.  
51

52  
53 318

54  
55  
56 **319 Ethics approval:** This study was approved by the ethics committee of the third Xiangya  
57  
58 320 hospital of Central South University (2020S264). Because of the observational nature of  
59  
60

1  
2  
3  
4 321 the study, informed consent was waived.

5  
6 322

7  
8  
9 323 **Data sharing statement:** The data used and analyzed in this study are available from

10  
11 324 the corresponding author on reasonable request.  
12  
13  
14  
15  
16  
17  
18  
19  
20  
21  
22  
23  
24  
25  
26  
27  
28  
29  
30  
31  
32  
33  
34  
35  
36  
37  
38  
39  
40  
41  
42  
43  
44  
45  
46  
47  
48  
49  
50  
51  
52  
53  
54  
55  
56  
57  
58  
59  
60

For peer review only

---

**REFERENCES**

- [1] Romagnoli S, Ricci Z. Postoperative acute kidney injury. *Minerva Anesthesiol.* 2015;81:684–696.
- [2] Ortega-Loubon C, Fernandez-Molina M, Carrascal-Hinojal Y, Fulquet-Carreras E. Cardiac surgery-associated acute kidney injury. *Ann Card Anaesth.* 2016;19:687–698.
- [3] Bell S, Ross VC, Zealley KA, Millar F, Isles C. Management of post-operative acute kidney injury. *QJM.* 2017;110:695–700.
- [4] Iyigun M, Aykut G, Tosun M, et al. Perioperative risk factors of acute kidney injury after non-cardiac surgery: A multicenter, prospective, observational study in patients with low grade American Society of Anesthesiologists physical status. *Am J Surg.* 2019;218:457–461.
- [5] Turan A, Cohen B, Adegboye J, et al. Mild acute kidney injury after noncardiac surgery is associated with long-term renal dysfunction: a retrospective cohort study. *Anesthesiology.* 2020 May;132(5):1053-1061.
- [6] Cuniberti B, Odore R, Barbero R, et al. In vitro and ex vivo pharmacodynamics of selected non-steroidal anti-inflammatory drugs in equine whole blood. *Vet J.* 2012;191:327–333.
- [7] Mitchell JA, Warner TD. COX isoforms in the cardiovascular system: understanding the activities of non-steroidal anti-inflammatory drugs. *Nat Rev Drug Discov.* 2006;5:75–86.
- [8] Sriperumbuduri S, Hiremath S. The case for cautious consumption: NSAIDs in chronic kidney disease. *Curr Opin Nephrol Hypertens.* 2019;28:163–170.

- 1  
2  
3  
4 347 [9] Ungprasert P, Cheungpasitporn W, Crowson CS, Matteson EL. Individual non-  
5  
6 348 steroidal anti-inflammatory drugs and risk of acute kidney injury: A systematic  
7  
8  
9 349 review and meta-analysis of observational studies. *Eur J Intern Med.* 2015;26:285–  
10  
11 350 291.
- 12  
13  
14 351 [10] Amabile CM, Spencer AP. Parecoxib for parenteral analgesia in postsurgical  
15  
16 352 patients. *Ann Pharmacother.* 2004;38:882–886.
- 17  
18  
19 353 [11] Khwaja A. KDIGO clinical practice guidelines for acute kidney injury. *Nephron*  
20  
21 354 *Clin Pract.* 2012;120:C179–C184.
- 22  
23  
24 355 [12] Vaara ST, Bellomo R. Postoperative renal dysfunction after noncardiac surgery.  
25  
26 356 *Curr Opin Crit Care.* 2017;23:440–446.
- 27  
28  
29 357 [13] Kim M, Brady JE, Li G. Variations in the risk of acute kidney injury across  
30  
31 358 intraabdominal surgery procedures. *Anesth Analg.* 2014;119:1121–1132.
- 32  
33  
34 359 [14] Biteker M, Dayan A, Tekkesin AI, et al. Incidence, risk factors, and outcomes of  
35  
36 360 perioperative acute kidney injury in noncardiac and nonvascular surgery. *Am J Surg.*  
37  
38 361 2014;207:53–59.
- 39  
40  
41 362 [15] Nishimoto M, Murashima M, Kokubu M, et al. Positive association between intra-  
42  
43 363 operative fluid balance and post-operative acute kidney injury in non-cardiac surgery:  
44  
45 364 the NARA-AKI cohort study. *J Nephrol.* 2020 Jun;33(3):561-568.
- 46  
47  
48 365 [16] Mathis MR, Naik BI, Freundlich RE, et al. Preoperative risk and the association  
49  
50 366 between hypotension and postoperative acute kidney injury. *Anesthesiology.*  
51  
52 367 2020;132:461–475.
- 53  
54  
55 368 [17] Cho E, Kim SC, Kim MG, et al. The incidence and risk factors of acute kidney injury  
56  
57  
58  
59  
60

- 1  
2  
3  
4 369 after hepatobiliary surgery: a prospective observational study. *BMC Nephrol.*  
5  
6 370 2014;15:169.  
7  
8  
9 371 [18] Wang J, Yu W, Zhai G, et al. Independent risk factors for postoperative AKI and the  
10  
11 372 impact of the AKI on 30-day postoperative outcomes in patients with type A acute  
12  
13 373 aortic dissection: an updated meta-analysis and meta-regression. *J Thorac Dis.*  
14  
15 374 2018;10:2590–2598.  
16  
17  
18 375 [19] Bell S, Rennie T, Marwick CA, Davey P. Effects of peri-operative nonsteroidal anti-  
19  
20 376 inflammatory drugs on post-operative kidney function for adults with normal kidney  
21  
22 377 function. *Cochrane Database Syst Rev.* 2018;11:CD011274.  
23  
24  
25 378 [20] Schug SA, Parsons B, Li C, Xia F. The safety profile of parecoxib for the treatment  
26  
27 379 of postoperative pain: a pooled analysis of 28 randomized, double-blind, placebo-  
28  
29 380 controlled clinical trials and a review of over 10 years of postauthorization data. *J*  
30  
31 381 *Pain Res.* 2017;10:2451–2459.  
32  
33  
34 382 [21] Takaku M, da Silva AC, Iritsu NI, Vianna PTG, Castiglia YMM. Effects of a single  
35  
36 383 dose of parecoxib on inflammatory response and ischemic tubular injury caused by  
37  
38 384 hemorrhagic shock in rats. *Pain Res Treat.* 2018;2018:8375746.  
39  
40  
41 385 [22] Feitoza CQ, Camara NO, Pinheiro HS, et al. Cyclooxygenase 1 and/or 2 blockade  
42  
43 386 ameliorates the renal tissue damage triggered by ischemia and reperfusion injury. *Int*  
44  
45 387 *Immunopharmacol.* 2005;5:79–84.  
46  
47  
48 388 [23] Candelario-Jalil E, Gonzalez-Falcon A, Garcia-Cabrera M, Leon OS, Fiebich BL.  
49  
50 389 Post-ischaemic treatment with the cyclooxygenase-2 inhibitor nimesulide reduces  
51  
52 390 blood-brain barrier disruption and leukocyte infiltration following transient focal  
53  
54  
55  
56  
57  
58  
59  
60

- 1  
2  
3  
4 391 cerebral ischaemia in rats. *J Neurochem.* 2007;100:1108–1120.  
5  
6  
7 392 [24] Feitoza CQ, Sanders H, Cenedeze M, Camara NOS, Pacheco-Silva A. Pretreatment  
8  
9 393 with indomethacin protects from acute renal failure following ischemia-reperfusion  
10  
11 394 injury. *Transplant Proc.* 2002;34:2979–2980.  
12  
13  
14 395 [25] Murashima M, Nishimoto M, Kokubu M, et al. Inflammation as a predictor of acute  
15  
16 396 kidney injury and mediator of higher mortality after acute kidney injury in non-  
17  
18 397 cardiac surgery. *Sci Rep.* 2019;9:20260.  
19  
20  
21  
22 398 [26] Chong SJ, Wong YC, Wu J, et al. Parecoxib reduces systemic inflammation and  
23  
24 399 acute lung injury in burned animals with delayed fluid resuscitation. *Int J Inflamm.*  
25  
26 400 2014;2014:972645.  
27  
28  
29  
30 401 [27] Zhu Y, Wang S, Wu H, Wu Y. Effect of perioperative parecoxib on postoperative  
31  
32 402 pain and local inflammation factors PGE2 and IL-6 for total knee arthroplasty: a  
33  
34 403 randomized, double-blind, placebo-controlled study. *Eur J Orthop Surg Traumatol.*  
35  
36 404 2014;24:395–401.  
37  
38  
39  
40 405 [28] Lucas GNC, Leitao ACC, Alencar RL, et al. Pathophysiological aspects of  
41  
42 406 nephropathy caused by non-steroidal anti-inflammatory drugs. *J Bras Nefrol.*  
43  
44 407 2019;41:124–130.  
45  
46  
47  
48 408 [29] Hegazy R, Alashhab M, Amin M. Cardiorenal effects of newer NSAIDs (celecoxib)  
49  
50 409 versus classic NSAIDs (ibuprofen) in patients with arthritis. *J Toxicol.*  
51  
52 410 2011;2011:862153.  
53  
54  
55  
56  
57  
58  
59  
60

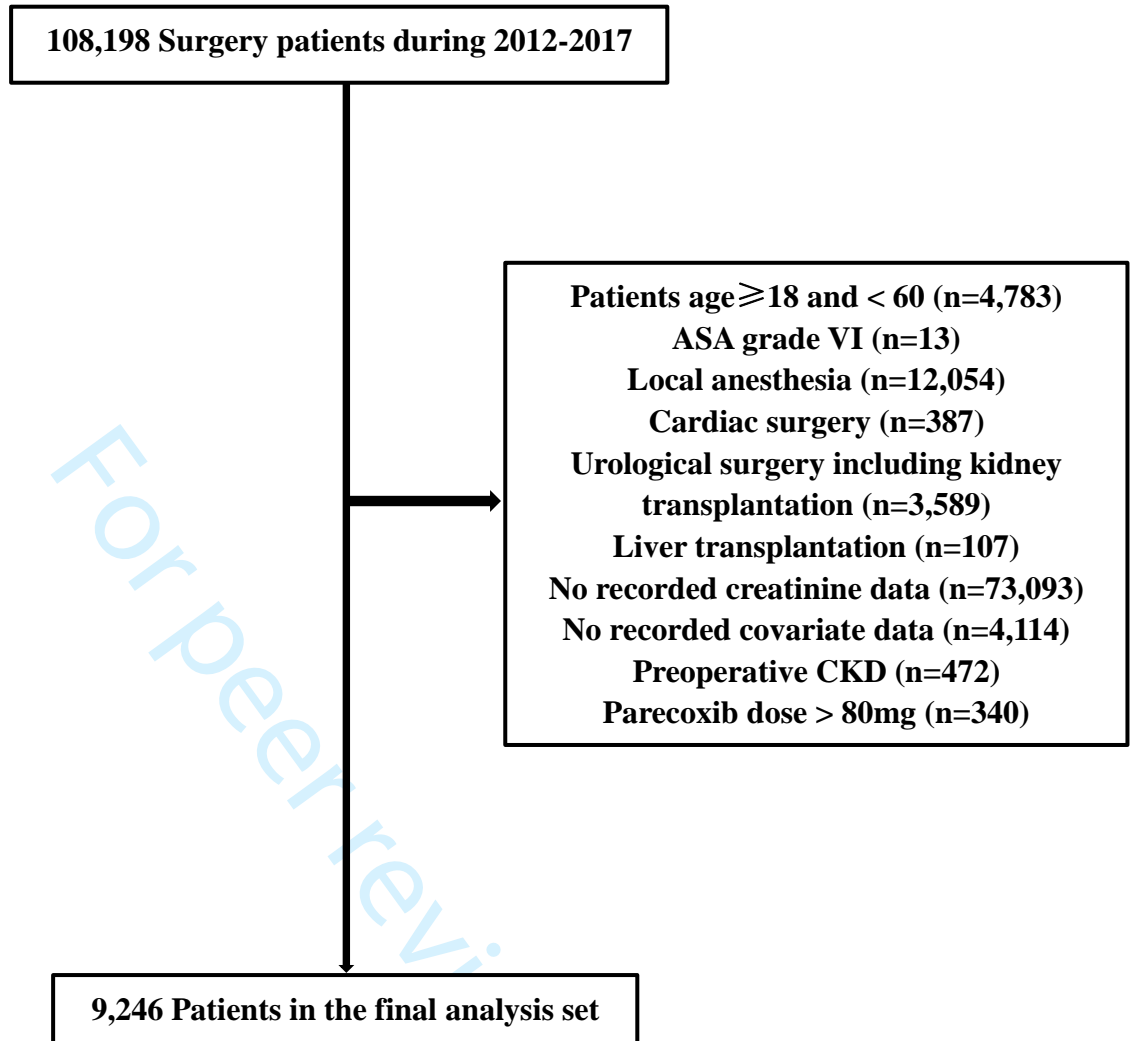

Fig 1. Enrollment of patients undergoing non-cardiac surgery.



**STROBE 2007 (v4) Statement—Checklist of items that should be included in reports of *cohort studies***

| Section/Topic                | Item # | Recommendation                                                                                                                                                                       | Reported on page # |
|------------------------------|--------|--------------------------------------------------------------------------------------------------------------------------------------------------------------------------------------|--------------------|
| <b>Title and abstract</b>    | 1      | (a) Indicate the study's design with a commonly used term in the title or the abstract                                                                                               | 1-2                |
|                              |        | (b) Provide in the abstract an informative and balanced summary of what was done and what was found                                                                                  | 2                  |
| <b>Introduction</b>          |        |                                                                                                                                                                                      |                    |
| Background/rationale         | 2      | Explain the scientific background and rationale for the investigation being reported                                                                                                 | 4-5                |
| Objectives                   | 3      | State specific objectives, including any prespecified hypotheses                                                                                                                     | 5                  |
| <b>Methods</b>               |        |                                                                                                                                                                                      |                    |
| Study design                 | 4      | Present key elements of study design early in the paper                                                                                                                              | 5                  |
| Setting                      | 5      | Describe the setting, locations, and relevant dates, including periods of recruitment, exposure, follow-up, and data collection                                                      | 5-6                |
| Participants                 | 6      | (a) Give the eligibility criteria, and the sources and methods of selection of participants. Describe methods of follow-up                                                           | 5-6                |
|                              |        | (b) For matched studies, give matching criteria and number of exposed and unexposed                                                                                                  | -                  |
| Variables                    | 7      | Clearly define all outcomes, exposures, predictors, potential confounders, and effect modifiers. Give diagnostic criteria, if applicable                                             | 6                  |
| Data sources/<br>measurement | 8*     | For each variable of interest, give sources of data and details of methods of assessment (measurement). Describe comparability of assessment methods if there is more than one group | 6                  |
| Bias                         | 9      | Describe any efforts to address potential sources of bias                                                                                                                            | 5                  |
| Study size                   | 10     | Explain how the study size was arrived at                                                                                                                                            | 5                  |
| Quantitative variables       | 11     | Explain how quantitative variables were handled in the analyses. If applicable, describe which groupings were chosen and why                                                         | 7                  |
| Statistical methods          | 12     | (a) Describe all statistical methods, including those used to control for confounding                                                                                                | 6-7                |
|                              |        | (b) Describe any methods used to examine subgroups and interactions                                                                                                                  | 7                  |
|                              |        | (c) Explain how missing data were addressed                                                                                                                                          | 6-7                |
|                              |        | (d) If applicable, explain how loss to follow-up was addressed                                                                                                                       | 7                  |
|                              |        | (e) Describe any sensitivity analyses                                                                                                                                                | 7                  |
| <b>Results</b>               |        |                                                                                                                                                                                      |                    |

|                          |     |                                                                                                                                                                                                              |       |
|--------------------------|-----|--------------------------------------------------------------------------------------------------------------------------------------------------------------------------------------------------------------|-------|
| Participants             | 13* | (a) Report numbers of individuals at each stage of study—eg numbers potentially eligible, examined for eligibility, confirmed eligible, included in the study, completing follow-up, and analysed            | 7     |
|                          |     | (b) Give reasons for non-participation at each stage                                                                                                                                                         | 7     |
|                          |     | (c) Consider use of a flow diagram                                                                                                                                                                           | 7     |
| Descriptive data         | 14* | (a) Give characteristics of study participants (eg demographic, clinical, social) and information on exposures and potential confounders                                                                     | 8     |
|                          |     | (b) Indicate number of participants with missing data for each variable of interest                                                                                                                          | 7     |
|                          |     | (c) Summarise follow-up time (eg, average and total amount)                                                                                                                                                  | 7     |
| Outcome data             | 15* | Report numbers of outcome events or summary measures over time                                                                                                                                               | 8-11  |
| Main results             | 16  | (a) Give unadjusted estimates and, if applicable, confounder-adjusted estimates and their precision (eg, 95% confidence interval). Make clear which confounders were adjusted for and why they were included | 14-17 |
|                          |     | (b) Report category boundaries when continuous variables were categorized                                                                                                                                    | 8-17  |
|                          |     | (c) If relevant, consider translating estimates of relative risk into absolute risk for a meaningful time period                                                                                             | -     |
| Other analyses           | 17  | Report other analyses done—eg analyses of subgroups and interactions, and sensitivity analyses                                                                                                               | 18-19 |
| <b>Discussion</b>        |     |                                                                                                                                                                                                              |       |
| Key results              | 18  | Summarise key results with reference to study objectives                                                                                                                                                     | 20-22 |
| <b>Limitations</b>       |     |                                                                                                                                                                                                              |       |
| Interpretation           | 20  | Give a cautious overall interpretation of results considering objectives, limitations, multiplicity of analyses, results from similar studies, and other relevant evidence                                   | 22    |
| Generalisability         | 21  | Discuss the generalisability (external validity) of the study results                                                                                                                                        | -     |
| <b>Other information</b> |     |                                                                                                                                                                                                              |       |
| Funding                  | 22  | Give the source of funding and the role of the funders for the present study and, if applicable, for the original study on which the present article is based                                                | 23    |

\*Give information separately for cases and controls in case-control studies and, if applicable, for exposed and unexposed groups in cohort and cross-sectional studies.

**Note:** An Explanation and Elaboration article discusses each checklist item and gives methodological background and published examples of transparent reporting. The STROBE checklist is best used in conjunction with this article (freely available on the Web sites of PLoS Medicine at <http://www.plosmedicine.org/>, Annals of Internal Medicine at <http://www.annals.org/>, and Epidemiology at <http://www.epidem.com/>). Information on the STROBE Initiative is available at [www.strobe-statement.org](http://www.strobe-statement.org).

# BMJ Open

## Correlation between perioperative parecoxib use and postoperative acute kidney injury in patients undergoing non-cardiac surgery: A retrospective cohort analysis

|                                 |                                                                                                                                                                                                                                                                                                                                                                                                                                                                                                                                                                                                                                                 |
|---------------------------------|-------------------------------------------------------------------------------------------------------------------------------------------------------------------------------------------------------------------------------------------------------------------------------------------------------------------------------------------------------------------------------------------------------------------------------------------------------------------------------------------------------------------------------------------------------------------------------------------------------------------------------------------------|
| Journal:                        | <i>BMJ Open</i>                                                                                                                                                                                                                                                                                                                                                                                                                                                                                                                                                                                                                                 |
| Manuscript ID                   | bmjopen-2020-047840.R1                                                                                                                                                                                                                                                                                                                                                                                                                                                                                                                                                                                                                          |
| Article Type:                   | Original research                                                                                                                                                                                                                                                                                                                                                                                                                                                                                                                                                                                                                               |
| Date Submitted by the Author:   | 27-Apr-2021                                                                                                                                                                                                                                                                                                                                                                                                                                                                                                                                                                                                                                     |
| Complete List of Authors:       | Tang, Yong-Zhong; Central South University Third Xiangya Hospital, Anesthesiology<br>Zeng, Pingping; Central South University Third Xiangya Hospital, Department of Anesthesiology<br>Liao, Yan; Central South University Third Xiangya Hospital, Department of Anesthesiology<br>Qin, Zheng; Hunan University College of Computer Science and Electronic Engineering<br>Zhang, Hao; Institute of Microelectronics of Chinese Academy of Sciences<br>Li, Bo; Central South University Third Xiangya Hospital<br>Ouyang, Wen; Central South University Third Xiangya Hospital<br>li, dan; Central South University, Department of Anesthesiology |
| <b>Primary Subject Heading</b>: | Urology                                                                                                                                                                                                                                                                                                                                                                                                                                                                                                                                                                                                                                         |
| Secondary Subject Heading:      | Surgery, Pharmacology and therapeutics, Anaesthesia                                                                                                                                                                                                                                                                                                                                                                                                                                                                                                                                                                                             |
| Keywords:                       | Adult anaesthesia < ANAESTHETICS, Acute renal failure < NEPHROLOGY, Pain management < ANAESTHETICS                                                                                                                                                                                                                                                                                                                                                                                                                                                                                                                                              |
|                                 |                                                                                                                                                                                                                                                                                                                                                                                                                                                                                                                                                                                                                                                 |

SCHOLARONE™  
Manuscripts

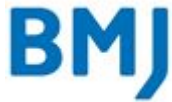

I, the Submitting Author has the right to grant and does grant on behalf of all authors of the Work (as defined in the below author licence), an exclusive licence and/or a non-exclusive licence for contributions from authors who are: i) UK Crown employees; ii) where BMJ has agreed a CC-BY licence shall apply, and/or iii) in accordance with the terms applicable for US Federal Government officers or employees acting as part of their official duties; on a worldwide, perpetual, irrevocable, royalty-free basis to BMJ Publishing Group Ltd ("BMJ") its licensees and where the relevant Journal is co-owned by BMJ to the co-owners of the Journal, to publish the Work in this journal and any other BMJ products and to exploit all rights, as set out in our [licence](#).

The Submitting Author accepts and understands that any supply made under these terms is made by BMJ to the Submitting Author unless you are acting as an employee on behalf of your employer or a postgraduate student of an affiliated institution which is paying any applicable article publishing charge ("APC") for Open Access articles. Where the Submitting Author wishes to make the Work available on an Open Access basis (and intends to pay the relevant APC), the terms of reuse of such Open Access shall be governed by a Creative Commons licence – details of these licences and which [Creative Commons](#) licence will apply to this Work are set out in our licence referred to above.

Other than as permitted in any relevant BMJ Author's Self Archiving Policies, I confirm this Work has not been accepted for publication elsewhere, is not being considered for publication elsewhere and does not duplicate material already published. I confirm all authors consent to publication of this Work and authorise the granting of this licence.

---

1 **Correlation between perioperative parecoxib use and postoperative acute kidney**  
2 **injury in patients undergoing non-cardiac surgery: A retrospective cohort analysis**

3

4 Yongzhong Tang, M.D.<sup>1</sup>, Pingping Zeng, M.D.<sup>1</sup>, Yan Liao, M.D.<sup>1</sup>, Zheng Qin, Ph.D.<sup>2</sup>,  
5 Hao Zhang, Ph.D.<sup>3</sup>, Bo Li, M.D.<sup>4</sup>, Wen Ouyang, Ph.D.<sup>1</sup>, and Dan Li, Ph.D.<sup>1\*</sup>

6 <sup>1</sup> Department of Anesthesiology, The Third Xiangya Hospital, Central South University,  
7 Changsha, China

8 <sup>2</sup> College of Computer Science and Electronic Engineering, Hunan University, Changsha,  
9 China

10 <sup>3</sup> Institute of Microelectronics of Chinese of Science, Beijing, China

11 <sup>4</sup>Operation Room, The Third Xiangya Hospital, Central South University, Changsha,  
12 China

13  
14 **Corresponding author:** Dan Li, Department of Anesthesiology, The Third Xiangya  
15 Hospital, Central South University, 138 Tongzipo Road, Changsha, Hunan , 410013,  
16 China

17 Tel: +8613574871720, Fax: +8673188618151, E-mail: [danfuer623@163.com](mailto:danfuer623@163.com)

18

---

## 19 Abstract

20 **Objective:** The association of nonsteroidal anti-inflammatory drugs with postoperative acute kidney  
21 injury is controversial. However, there are few studies focusing on the association between parecoxib  
22 and postoperative acute kidney injury. Our study aimed at the possible correlation between the  
23 intraoperative administration of COX-2 inhibitors parecoxib and perioperative AKI.

24 **Design:** A retrospective cohort study

25 **Setting:** Third Xiangya Hospital of Central South University in Hunan Province, China

26 **Participants:** The electronic medical records and laboratory results were obtained from 9,246 adult  
27 patients (18–60 years) undergoing non-cardiac surgery performed between January 1, 2012 to August  
28 31, 2017. Study groups were treated with or without parecoxib.

29 **Interventions:** Univariable analysis identified demographic, preoperative laboratory, and  
30 intraoperative factors associated with acute kidney injury. Logistic stepwise regression was used to  
31 calculate the adjusted odds ratio of parecoxib and acute kidney injury association.

32 **Results:** The incidence of acute kidney injury was lower in the parecoxib-administered group (4%)  
33 than that in the group without parecoxib (6.3%,  $p = 0.005$ ). In the Multivariable regression analysis,  
34 postoperative acute kidney injury risk reduced by 39% (OR, 0.61; 95% CI, 0.43–0.87) in the  
35 parecoxib-administered group after adjusting for interference factors. Sensitivity analysis showed that  
36 postoperative AKI risk reduced in four subgroups: eGFR < 90 mL · min<sup>-1</sup> · 1.73m<sup>(2)</sup><sup>-1</sup> (OR, 0.49; 95%CI,  
37 0.29-0.82), non-smoker (OR, 0.55; 95%CI, 0.37-0.83), blood loss < 1000ml (OR, 0.55; 95%CI, 0.37-  
38 0.83) and non-hypotension (OR, 0.57; 95%CI, 0.38-0.84).

39 **Conclusions:** Thus, parecoxib may slightly hint at a protective effect against postoperative acute  
40 kidney injury risk in adult patients undergoing non-cardiac surgery.

1  
2  
3  
4 **Keywords:** acute kidney injury; parecoxib; non-cardiac surgery  
5  
6

7 43

8  
9 **Strengths and limitations of this study:** Large study population including all adult patients (18–60  
10  
11 years) undergoing non-cardiac surgery in Third Xiangya Hospital of Central South University in China  
12  
13  
14 between 2012 to 2017.□

15  
16  
17 □ Our study indicated that parecoxib may slightly hint at a protective effect against postoperative  
18  
19 acute kidney injury risk.  
20

21  
22 The selection bias and some unknown confounders in this retrospective single-center  
23  
24  
25 observational study may limit the generalisability of the results.  
26  
27  
28  
29  
30  
31  
32  
33  
34  
35  
36  
37  
38  
39  
40  
41  
42  
43  
44  
45  
46  
47  
48  
49  
50  
51  
52  
53  
54  
55  
56  
57  
58  
59  
60

---

## 51 **Background**

52 Acute kidney injury (AKI), a long-recognized complication of surgery with a high  
53 incidence of morbidity and mortality, increases health care costs and length of hospital  
54 stay[1-3]. Even in patients undergoing non-cardiac surgery with low-grade American  
55 Society of Anesthesiologists (ASA) physical status such as ASA I–II, the incidence of  
56 postoperative AKI can reach 6%[4]. Mild kidney injury, such as a small increase in  
57 postoperative serum creatinine, is associated with renal dysfunction for as long as 1 to 2  
58 years after surgery [5].

59 Nonsteroidal anti-inflammatory drugs (NSAIDs) are commonly used perioperative  
60 anesthetic adjuvants, with anti-inflammatory and analgesic effects. The main mechanism  
61 of action of NSAIDs is the inhibition of cyclooxygenase (COX) enzymes, which can  
62 ultimately result in the reduction of prostanoids and thromboxan[6]. Within the kidneys,  
63 prostaglandins act as vasodilators to ensure adequate flow to the organ. NSAIDs inhibit  
64 this mechanism and can lead to acute kidney injury (AKI). The second form of NSAID-  
65 induced AKI is acute interstitial nephritis, which may related to the prolonged exposure  
66 to NSAIDs, and interstitial infiltrate with predominance of T-lymphocytes[7].

67 COX exists in two forms: COX-1, which is present in most body tissues body including  
68 the stomach and intestines and COX-2, which is primarily found at sites of  
69 inflammation[8]. Accumulating evidence suggests that traditional NSAIDs, such as  
70 aspirin and ibuprofen, are associated with acute and chronic gastrointestinal bleeding and  
71 kidney disease[9 10]. These NSAIDs are nonselective COX (COX-1 and COX-2)  
72 inhibitors and their side effects are mostly COX-1 related.



73 Parecoxib is a parenteral specific COX-2 inhibitor, which enhances its therapeutic gain  
74 with minimal adverse effects[6 11]. Parecoxib is used as a perioperative analgesic in over  
75 80 countries, however, clinical data about effect of parecoxib on postoperative AKI are  
76 scarce. Therefore, it is important to establish its safety during the perioperative period.  
77 The aim of this study was to assess the correlation between the perioperative use of  
78 parecoxib and postoperative AKI in patients undergoing non-cardiac surgery.

## 80 **Methods**

### 81 Design and selection criteria

82 This retrospective study was performed at the Third Xiangya Hospital of Central South  
83 University from January 1, 2012, to August 31, 2017. The inclusion criterion was patients  
84 aged 18–60 years who underwent non-cardiac surgery. The exclusion criteria were ASA  
85 grade VI, administration of local anesthesia, liver transplantation, cardiac surgery,  
86 urological surgery (including kidney transplantation), lack of serum creatinine or  
87 covariate data, and preoperative combined CKD, defined as estimate glomerular filtration  
88 rate (eGFR)  $<60 \text{ mL} \cdot \text{min}^{-1} \cdot 1.73\text{m}^{(2)}^{-1}$ ,  $\geq 3$  months). Parecoxib doses larger than 80 mg  
89 were not included because the routine dose is not more than 80 mg/day based on the drug  
90 instructions. The study was approved by the Ethics Committee of the Third Xiangya  
91 Hospital of Central South University (approval number 2020S264) that waived the need  
92 for informed consent because of the observational nature of the study.

### 94 Data collection

1  
2  
3  
4 95 The following information was collected: 1) epidemiological data including age, sex,  
5  
6 96 and BMI; 2) individual history including preoperative complications and medication  
7  
8  
9 97 history; 3) laboratory data including serum creatinine and eGFR calculated using the  
10  
11 98 Chronic Kidney Disease Epidemiology Collaboration (CKD-EPI) formula; 4)  
12  
13  
14 99 intraoperative data including emergency, surgical grade, operative time, anesthesia  
15  
16  
17 100 method, ASA grade, amount of fluid infusion and out, intraoperative erythrocyte  
18  
19  
20 101 transfusion volume, amount of blood loss, intraoperative hypotension and vasoactive  
21  
22 102 drugs. 5) postoperative outcomes such as occurrence of AKI, admission to ICU, and  
23  
24 103 mortality. All clinical data of the 9,246 patients who underwent non-cardiac surgery were  
25  
26  
27 104 obtained by a retrospective review of the computerized patient record system of our  
28  
29  
30 105 hospital.

31  
32 10633  
34  
35 107 Definitions

36  
37 108 Postoperative AKI was defined according to the Kidney Disease: Improving Global  
38  
39  
40 109 Outcomes (KDIGO) 2012 creatinine criteria[12], as one of the following: an increase in  
41  
42  
43 110 serum creatinine by  $\geq 0.3$  mg/dL within 48 h or a  $\geq 1.5$ -times increase in serum creatinine  
44  
45  
46 111 from baseline within 7 postoperative days. The baseline serum creatinine level was  
47  
48  
49 112 calculated using the lowest level within preoperative day 7. The primary outcome was the  
50  
51  
52 113 impact of parecoxib on AKI, defined as AKI occurring within 7 postoperative days.  
53  
54  
55 114 Parecoxib administration was defined during the operative time. Surgical grade was  
56  
57  
58 115 classified using the surgical classification catalogue constituted by the Chinese Ministry  
59  
60 116 of Health, published in 2018. Intraoperative hypotension was defined as mean arterial

1  
2  
3  
4 117 pressure (MAP) <65mmHg for a duration of at least 5 min.  
5  
6

7 118

8  
9 119 Patient and public involvement

10  
11 120 No patient involvement.  
12  
13

14 121

15  
16  
17 122 Statistical analysis

18  
19 123 All statistical analyses were performed using SAS version 9.4 software (SAS  
20  
21  
22 124 Institute, Inc., Cary, NC, USA) and CRAN R (v3.4.3). Missing data of covariates  
23  
24 125 (including BMI and eGFR) were handled by multiple imputation model. The continuous  
25  
26  
27 126 results are expressed as mean (SD), whereas categorical variables are expressed as  
28  
29  
30 127 numbers with percentages. The Kruskal-Wallis rank sum test was used to compare  
31  
32  
33 128 continuous variables between groups, whereas the chi-square ( $\chi^2$ ) test or Fisher's exact  
34  
35  
36 129 probability method was used for categorical variables. Univariable logistic regression  
37  
38  
39 130 analysis was used to identify epidemiological, preoperative laboratory, and  
40  
41  
42 131 intraoperative factors that were significantly associated with AKI development. The  
43  
44  
45 132 data were adjusted for potential confounders in multivariable regression models. To  
46  
47  
48 133 further validate these results in a number of specific populations that may influence the  
49  
50  
51 134 incidence of AKI. The sensitivity test was performed in the following four different  
52  
53  
54 135 subgroups: eGFR<90 mL·min<sup>-1</sup>·1.73m<sup>(2)</sup><sup>-1</sup>, non-smoker, blood loss <1000ml, and non-  
55  
56  
57 136 hypotension. The results of the classification variable are expressed as odds ratio (OR)  
58  
59  
60 137 or "Beta" and 95% CI; a p-value < 0.05 indicated a statistically significant difference.  
138

## 139 Results

140 Of the 108,198 records identified, those of 9,246 patients were included in the analysis  
 141 (Fig. 1). Reasons for excluding patients were age <18 or >60 years (n = 4,783), ASA  
 142 grade VI (n = 13), regional anesthesia administered by a surgeon (n = 12,054), cardiac  
 143 surgery (n = 387), urological surgery including kidney transplantation (n = 3,589), liver  
 144 transplantation (n = 107), no recorded preoperative or postoperative creatinine data  
 145 (n=73,093), no recorded covariate data such as routine blood panel or infusion volume (n  
 146 = 4,114), preoperative chronic kidney disease (CKD) (n = 472), and administration of  
 147 parecoxib doses >80 mg (n = 340).

## 149 AKI

150 The incidence of postoperative AKI was 6.06% (560/9,246). In the AKI group, the  
 151 probability of admission to the intensive care unit (ICU) and mortality were 10.18% and  
 152 4.64%, respectively (Supplemental Table 1).

154 **Supplemental Table 1.** Baseline characteristics of patients aged 18–60 years with and  
 155 without acute kidney injury (AKI)

| Clinical features | without AKI<br>(n=8686) | With AKI<br>(n=560) | p-value |
|-------------------|-------------------------|---------------------|---------|
| Age (years)       | 44.25±10.43             | 45.06±10.18         | 0.074   |
| BMI               | 22.93±4.93              | 22.54±3.83          | 0.07    |

|                        |               |              |        |
|------------------------|---------------|--------------|--------|
| eGFR                   | 101.98±16.38  | 94.41±19.78  | <0.001 |
| Male                   | 4267 (49.13%) | 300 (53.57%) | 0.041  |
| Smoking                | 1213 (13.97%) | 105 (18.75%) | 0.002  |
| Alcohol consumption    | 822 (9.46%)   | 74 (13.21%)  | 0.004  |
| Anemia                 | 1538 (17.71%) | 161 (28.75%) | <0.001 |
| Hypertension           | 1884 (21.69%) | 211 (37.68%) | <0.001 |
| Diabetes mellitus      | 509 (5.86%)   | 52 (9.29%)   | <0.001 |
| ACEI                   | 189 (2.18%)   | 21 (3.75%)   | 0.015  |
| ARB                    | 116 (1.34%)   | 13 (2.32%)   | 0.054  |
| CCB                    | 1125 (12.95%) | 119 (21.25%) | <0.001 |
| Diuretics              | 77 (0.89%)    | 19 (3.39%)   | <0.001 |
| ASA grade              |               |              | <0.001 |
| I-II                   | 6633 (76.36%) | 317 (56.61%) |        |
| III-V                  | 2053 (23.64%) | 243 (43.39%) |        |
| Anesthesia method      |               |              | <0.001 |
| General anesthesia     | 7735 (89.05%) | 531 (94.82%) |        |
| Non-general anesthesia | 951 (10.95%)  | 29 (5.18%)   |        |
| Emergency              | 1395 (16.06%) | 130 (23.21%) | <0.001 |
| Surgical Grade         |               |              | <0.001 |
| 1                      | 245 (2.82%)   | 14 (2.50%)   |        |
| 2                      | 2746 (31.61%) | 118 (21.07%) |        |
| 3                      | 5349 (61.58%) | 386 (68.93%) |        |

|                            |                        |                  |        |
|----------------------------|------------------------|------------------|--------|
| 4                          | 346 (3.98%)            | 42 (7.50%)       |        |
| Operative time (min)       |                        |                  | <0.001 |
| ≤60                        | 1338 (15.4%)           | 63 (11.25%)      |        |
| 61–120                     | 2176 (25.05%)          | 111 (19.82%)     |        |
| 121–180                    | 2032 (23.39%)          | 135 (24.11%)     |        |
| >180                       | 3140 (36.15%)          | 251 (44.82%)     |        |
| Intraoperative erythrocyte |                        |                  | <0.001 |
| Transfusion, mL (%)        |                        |                  |        |
| <100                       | 6735 (77.54)           | 339 (60.54)      |        |
| 100–600                    | 868 (9.99)             | 82 (14.64)       |        |
| 601–1000                   | 508 (5.85)             | 42 (7.50)        |        |
| >1000                      | 575 (6.62)             | 97 (17.32)       |        |
| Amount of Blood loss, mL   |                        |                  | <0.001 |
| (%)                        |                        |                  |        |
| <100                       | 2623 (30.20)           | 131 (23.39)      |        |
| 100–600                    | 4771 (54.93)           | 292 (52.14)      |        |
| 601–1000                   | 670 (7.71)             | 60 (10.71)       |        |
| >1000                      | 622 (7.16)             | 77 (13.75)       |        |
| Amount of fluid infusion   | 916.67 (625.00–        | 1125.00 (703.12– | <0.001 |
| (10 mL/24 h)               | 1432.29)               | 1604.17)         |        |
| Amount of fluid out        |                        | 375.00 (208.33–  | <0.001 |
| (10 mL/24 h)               | 333.33 (145.83–541.67) | 687.50)          |        |

|                            |              |             |        |
|----------------------------|--------------|-------------|--------|
| Intraoperative Hypotension | 930 (10.71%) | 81 (14.46%) | 0.006  |
| Vasoactive drugs           | 664 (7.64%)  | 71 (12.68%) | <0.001 |
| Parecoxib                  | 934 (10.75%) | 39 (6.96%)  | 0.005  |
| Admission to ICU           | 376 (4.33%)  | 57 (10.18%) | <0.001 |
| Death                      | 32 (0.37%)   | 26 (4.64%)  | <0.001 |

156

157 AKI: acute kidney injury, BMI: body mass index, eGFR: estimated glomerular filtration rate, ACEI:  
 158 angiotensin-converting enzyme inhibitors, ARB: angiotensin receptor blockers, CCB: calcium-  
 159 channel blockers, ASA: American Society of Anesthesiologists, Non-general anesthesia include  
 160 neuraxial anesthesia (spinal or epidural) and nerve block anesthesia, ICU: intensive care unit. Data are  
 161 expressed as number of patients (%) or mean  $\pm$  standard deviation (SD).

162

163 There was no difference in age, body mass index (BMI), angiotensin receptor blockers  
 164 (ARBs) use and intraoperative hypotension among patients with and without AKI  
 165 (Supplemental Table 1). Significant differences between patients with AKI and without  
 166 AKI are shown in Supplemental Table 1 (all  $p < 0.05$ ).

167

168 Parecoxib

169 Parecoxib was used in 10.5% (973/9,246) of patients (Table 1).

170

171 Table 1. Baseline characteristics of patients aged 18–60 years treated with and without  
 172 parecoxib

| Clinical features      | Without parecoxib<br>(n=8273) | With parecoxib<br>(n=973) | p-value |
|------------------------|-------------------------------|---------------------------|---------|
| Age (year)             | 44.23±10.46                   | 44.89±10.04               | 0.06    |
| BMI                    | 22.89±4.99                    | 23.03±3.76                | 0.409   |
| eGFR                   | 101.66±16.66                  | 101.56±16.23              | 0.858   |
| Male                   | 4062 (49.1%)                  | 508 (52.2%)               | 0.063   |
| Smoking                | 1175 (14.2%)                  | 146 (15%)                 | 0.479   |
| Alcohol consumption    | 811 (9.8%)                    | 89 (9.1%)                 | 0.544   |
| Anemia                 | 1547 (18.7%)                  | 152 (15.6%)               | 0.019   |
| Hypertension           | 1903 (23%)                    | 189(19.4%)                | 0.011   |
| Diabetes mellitus      | 505 (6.1%)                    | 56 (5.8%)                 | 0.666   |
| ACEI                   | 199 (2.4%)                    | 14 (1.4%)                 | 0.065   |
| ARB                    | 116 (1.4%)                    | 14 (1.4%)                 | 0.902   |
| CCB                    | 1142 (13.8%)                  | 103 (10.6%)               | 0.006   |
| Diuretics              | 91 (1.1%)                     | 8 (0.8%)                  | 0.482   |
| ASA grade              |                               |                           | 0.09    |
| I-II                   | 6196 (74.9%)                  | 753 (77.4%)               |         |
| III-V                  | 2077 (25.1%)                  | 220 (22.6%)               |         |
| Anesthesia method      |                               |                           | <0.001  |
| General anesthesia     | 7363 (89%)                    | 907 (93.2%)               |         |
| Non-general anesthesia | 910 (11%)                     | 66 (6.8%)                 |         |
| Emergency              | 1406 (17%)                    | 119 (12.2%)               | <0.001  |



|                                                |              |             |        |
|------------------------------------------------|--------------|-------------|--------|
| Surgical grade                                 |              |             | <0.001 |
| 1                                              | 240 (2.9%)   | 19 (2%)     |        |
| 2                                              | 2623 (31.7%) | 243 (25%)   |        |
| 3                                              | 5080 (61.4%) | 656 (67.4%) |        |
| 4                                              | 330 (4%)     | 55 (5.7%)   |        |
| Operative time (min)                           |              |             | <0.001 |
| ≤60                                            | 1315 (15.9%) | 88 (9%)     |        |
| 61–120                                         | 2085 (25.2%) | 204 (21%)   |        |
| 121–180                                        | 1919 (23.2%) | 246 (25.3%) |        |
| >180                                           | 2954 (35.7%) | 435 (44.7%) |        |
| Intraoperative erythrocyte Transfusion, mL (%) |              |             | 0.94   |
| <100                                           | 6329 (76.5%) | 744 (76.5%) |        |
| 100–600                                        | 852 (10.3%)  | 98 (10.1%)  |        |
| 601–1000                                       | 496 (6%)     | 56 (5.8%)   |        |
| >1000                                          | 596 (7.2%)   | 75 (7.7%)   |        |
| Amount of Blood loss, mL (%)                   |              |             | 0.003  |
| <100                                           | 2507 (30.3%) | 251 (25.8%) |        |
| 100–600                                        | 4500 (4.4%)  | 559 (57.5%) |        |
| 601–1000                                       | 662 (8%)     | 70 (7.2%)   |        |
| >1000                                          | 604 (7.3%)   | 93 (9.6%)   |        |

|                                          |                |                |        |
|------------------------------------------|----------------|----------------|--------|
| Intraoperative Hypotension               | 10.8           | 11.9           | 0.297  |
| Vasoactive drugs                         | 7.8            | 8.9            | 0.227  |
| Amount of fluid infusion<br>(10 mL/24 h) | 1037.07±565.54 | 1159.31±579.85 | <0.001 |
| Amount of fluid out<br>(10 mL/24 h)      | 410.17±374.16  | 373.74±334.53  | 0.004  |
| AKI                                      | 521 (6.3%)     | 39 (4%)        | 0.005  |
| AKI Stages                               |                |                | 0.029  |
| 0                                        | 93.7           | 96             |        |
| 1                                        | 4.5            | 2.6            |        |
| 2                                        | 1              | 0.7            |        |
| 3                                        | 0.7            | 0.7            |        |

173 BMI: body mass index, eGFR: estimated glomerular filtration rate, ACEI: angiotensin-converting  
 174 enzyme inhibitors, ARB: angiotensin receptor blockers, CCB: calcium-channel blockers, ASA:  
 175 American Society of Anesthesiologists, Non-general anesthesia include neuraxial anesthesia (spinal  
 176 or epidural) and nerve block anesthesia, AKI: acute kidney injury. Data are expressed as number of  
 177 patients (%) or mean ± standard deviation (SD). AKI Stages (outcome of postoperative AKI was  
 178 divided into four groups: stage 0, no AKI; stage 1, AKI grade 1; stage 2, AKI grade 2 and stage 3,  
 179 AKI grade 3)  
 180  
 181 The incidence of AKI was lower in the parecoxib-administered group (4%) than in the  
 182 group without parecoxib (6.3%, p = 0.005). There was no difference in age, BMI,

183 estimated glomerular filtration rate (eGFR), sex, smoking, alcohol consumption, presence  
 184 of diabetes mellitus, use of angiotensin-converting enzyme inhibitors (ACEIs), ARBs, or  
 185 diuretics, ASA grade, incidence of intraoperative erythrocyte transfusion and  
 186 intraoperative hypotension, and use of vasoactive drugs between patients treated with and  
 187 without parecoxib (Table 1). Significant differences between patients treated with and  
 188 without parecoxib are shown in Table 1 (all  $p < 0.05$ ).

189

### 190 Univariable analysis

191 The factors shown by the univariable analysis to influence AKI development in patients  
 192 aged 18–60 years who underwent non-cardiac surgery are listed in Table 2.

193

194 Table 2. Univariable analysis of acute kidney injury (AKI)

| Variable            | Statistics    | Univariable       |         |
|---------------------|---------------|-------------------|---------|
|                     |               | OR (95% CI)       | p-value |
| Parecoxib           | 0.11 ± 0.31   | 0.62 (0.45, 0.87) | 0.0050  |
| Age (year)          | 44.30 ± 10.42 | 1.01 (1.00, 1.02) | 0.0737  |
| Male                | 4567 (49.39%) | 1.19 (1.01, 1.42) | 0.0416  |
| BMI                 | 22.90 ± 4.87  | 0.98 (0.95, 1.00) | 0.0396  |
| Smoking             | 1318 (14.25%) | 1.42 (1.14, 1.77) | 0.0018  |
| Alcohol consumption | 896 (9.69%)   | 1.46 (1.13, 1.88) | 0.0038  |
| Anemia              | 1699 (18.38%) | 1.88 (1.55, 2.27) | <0.0001 |
| Hypertension        | 2095 (22.66%) | 2.18 (1.83, 2.61) | <0.0001 |

|                                                |               |                   |         |
|------------------------------------------------|---------------|-------------------|---------|
| Diabetes mellitus                              | 561 (6.07%)   | 1.64 (1.22, 2.22) | 0.0011  |
| ACEI                                           | 210 (2.27%)   | 1.75 (1.11, 2.77) | 0.0167  |
| ARB                                            | 129 (1.40%)   | 1.76 (0.98, 3.14) | 0.0570  |
| CCB                                            | 1244 (13.45%) | 1.81 (1.47, 2.24) | <0.0001 |
| Diuretics                                      | 96 (1.04%)    | 3.93 (2.36, 6.54) | <0.0001 |
| eGFR                                           | 97.94±22.36   | 0.96 (0.96, 0.97) | <0.0001 |
| ASA grade III–V                                | 2296 (24.83%) | 2.48 (2.08, 2.95) | <0.0001 |
| Non-general anaesthesia                        | 980 (10.60%)  | 0.44 (0.30, 0.65) | <0.0001 |
| Emergency                                      | 1525 (16.49%) | 1.58 (1.29, 1.94) | <0.0001 |
| Surgical grade 4                               | 388 (4.20%)   | 2.12 (1.14, 3.98) | 0.0184  |
| Operative time (min)                           |               |                   |         |
| ≤60                                            | 1401 (15.15%) | 1                 |         |
| 61–120                                         | 2287 (24.74%) | 1.08 (0.79, 1.49) | 0.6200  |
| 121–180                                        | 2167 (23.44%) | 1.41 (1.04, 1.92) | 0.0279  |
| >180                                           | 3391 (36.68%) | 1.70 (1.28, 2.25) | 0.0003  |
| Intraoperative Hypotension                     | 1011 (10.93%) | 1.41 (1.10, 1.80) | 0.0060  |
| Vasoactive drugs                               | 735 (7.95%)   | 0.06 (0.03, 0.09) | <0.0001 |
| Intraoperative erythrocyte transfusion, mL (%) |               |                   |         |
| <100                                           | 7074 (76.51%) | 1                 |         |
| 100–600                                        | 950 (10.27%)  | 1.88 (1.46, 2.41) | <0.0001 |
| 601–1000                                       | 550 (5.95%)   | 1.64 (1.18, 2.29) | 0.0035  |

|                          |               |                   |         |
|--------------------------|---------------|-------------------|---------|
| >1000                    | 672 (7.27%)   | 3.35 (2.63, 4.27) | <0.0001 |
| Amount of Blood loss, mL |               |                   |         |
| (% )                     |               |                   |         |
| <100                     | 2754 (29.79%) | 1                 |         |
| 100–600                  | 5063 (54.76%) | 1.23 (0.99, 1.51) | 0.0596  |
| 601–1000                 | 730 (7.9%)    | 1.79 (1.31, 2.46) | 0.0003  |
| >1000                    | 699 (7.56%)   | 2.48 (1.85, 3.33) | <0.0001 |

195 OR: odds ratio, BMI: body mass index, ACEI: angiotensin-converting enzyme inhibitors, ARB:  
 196 angiotensin receptor blockers, CCB: calcium-channel blockers, ASA: American Society of  
 197 Anesthesiologists. Non-general anesthesia include neuraxial anesthesia (spinal or epidural) and nerve  
 198 block anesthesia.

199

200 In the univariable analysis, male sex, smoking, alcohol consumption, anemia,  
 201 hypertension, diabetes mellitus, ACEI use, calcium channel blocker (CCB) use, diuretic  
 202 use, ASA grade III–V, emergency, surgical grade 4, duration of the operation, incidence  
 203 of intraoperative hypotension and erythrocyte transfusion, and amount of blood loss were  
 204 independently associated with an increased risk of postoperative AKI (Table 2).

205 Parecoxib (OR, 0.62; 95%CI, 0.45–0.87,  $p = 0.005$ ), eGFR (OR, 0.96; 95%CI, 0.96–  
 206 0.97,  $p < 0.0001$ ), non-general anesthesia (OR, 0.44; 95%CI, 0.30–0.65,  $p < 0.0001$ ) and  
 207 vasoactive drug use (OR, 0.06; 95%CI, 0.03–0.09,  $p < 0.0001$ ) were independently  
 208 associated with a decreased risk of postoperative AKI (Table 2). Age (OR, 1.01; 95%CI,  
 209 1.00–1.02,  $p = 0.0737$ ), BMI (OR, 0.98; 95%CI, 0.95–1.00,  $p = 0.0396$ ), and ARB use

(OR, 1.76; 95%CI, 0.98–3.14,  $p = 0.0570$ ) were not correlated with AKI (Table 2).

211

212 Multivariable regression analysis

213 The occurrence of postoperative AKI or AKI Stages was regarded as a dependent  
214 variable, and the administration of parecoxib, an independent variable when we  
215 performed the stepwise regression analysis (Table 3).

216

217 Table 3 Odds ratio of postoperative acute kidney injury (AKI) associated with parecoxib

|            | <b>Model 1</b>        | <b>Model 2</b>        | <b>Model 3</b>        | <b>Model 4</b>        |
|------------|-----------------------|-----------------------|-----------------------|-----------------------|
|            | <b>OR (95% CI)</b>    | <b>OR (95% CI)</b>    | <b>OR (95% CI)</b>    | <b>OR (95% CI)</b>    |
|            | <b><i>p</i>-value</b> | <b><i>p</i>-value</b> | <b><i>p</i>-value</b> | <b><i>p</i>-value</b> |
| AKI        | 0.62 (0.45, 0.87)     | 0.64 (0.46, 0.90)     | 0.63 (0.44, 0.89)     | 0.61(0.43, 0.87)      |
|            | 0.0050                | 0.0096                | 0.0095                | 0.0069                |
| AKI Stages | -0.02 (-0.05, -       | -0.02 (-0.05, -       | -0.02 (-0.05, -       | -0.03(-0.05,-         |
|            | 0.00) 0.0627          | 0.00) 0.0792          | 0.00) 0.0517          | 0.00) 0.0236          |

218 AKI Stages (outcome of postoperative AKI was divided into four groups: stage 0, no AKI; stage 1,

219 AKI grade 1; stage 2, AKI grade 2 and stage 3, AKI grade 3)

220 Model 1: Non-adjusted.

221 Model 2: Adjusted for age, sex, BMI, smoking, alcohol consumption, anemia, hypertension, diabetes

222 mellitus, ACEI, CCB, diuretics, ASA, anesthesia method, emergency, surgical grade, amount of fluid

223 infusion and out, intraoperative erythrocyte transfusion, and amount of blood loss.

224 Model 3: Model 2 plus ARB, eGFR, and operative time.

225 Model 4: Model 3 plus intraoperative hypotension, and vasoactive drugs.

226

227 The risk adjustment models were constructed using logistic stepwise regression. After  
 228 adjusting for these interference factors, parecoxib was still independently associated with  
 229 postoperative AKI (OR, 0.61; 95% CI, 0.43–0.87, model 4 in Table 3) or different  
 230 postoperative AKI stages (OR, -0.03; 95% CI, -0.05– -0.00, model 4 in Table 3).

231

232 Sensitivity analysis

233 Table 4 presented the association between postoperative AKI and parecoxib in the  
 234 subgroups of eGFR  $<90 \text{ mL} \cdot \text{min}^{-1} \cdot 1.73 \text{ m}^{(2) -1}$ , non-smokers, blood loss  $<1000\text{ml}$ , and  
 235 intraoperative non-hypotension.

236

237 Table 4 Sensitivity analysis of association between postoperative acute kidney injury  
 238 (AKI) and parecoxib

|               |                      | <b>Model 1</b>        | <b>Model 2</b>        | <b>Model 3</b>        | <b>Model 4</b>        |
|---------------|----------------------|-----------------------|-----------------------|-----------------------|-----------------------|
|               |                      | <b>OR (95% CI)</b>    | <b>OR (95% CI)</b>    | <b>OR (95% CI)</b>    | <b>OR (95% CI)</b>    |
|               |                      | <b><i>p</i>-value</b> | <b><i>p</i>-value</b> | <b><i>p</i>-value</b> | <b><i>p</i>-value</b> |
|               | Without<br>parecoxib | Parecoxib             |                       |                       |                       |
| <b>eGFR</b>   | 1                    | 0.49 (0.31, 0.79)     | 0.54 (0.33, 0.87)     | 0.50 (0.30, 0.84)     | 0.49(0.29,0.82)       |
| <b>&lt;90</b> |                      | 0.0032                | 0.0119                | 0.0084                | 0.0065                |

|                              |   |                   |                   |                   |                   |
|------------------------------|---|-------------------|-------------------|-------------------|-------------------|
| <b>Non-smoker</b>            | 1 | 0.57 (0.39, 0.84) | 0.56 (0.37, 0.84) | 0.56 (0.38, 0.84) | 0.55(0.37,0.83)   |
|                              |   | 0.0040            | 0.0046            | 0.0052            | 0.0043            |
| <b>blood loss &lt;1000ml</b> | 1 | 0.56 (0.39, 0.82) | 0.57 (0.39, 0.84) | 0.56 (0.37, 0.83) | 0.55 (0.37, 0.83) |
|                              |   | 0.0027            | 0.0042            | 0.0040            | 0.0037            |
| <b>non-hypotension</b>       | 1 | 0.60 (0.42, 0.87) | 0.60 (0.42, 0.87) | 0.57 (0.38, 0.84) |                   |
|                              |   | 0.0064            | 0.0077            | 0.0050            |                   |

239 Model 1: Non-adjusted.

240 Model 2: Adjusted for age, sex, BMI, smoking, alcohol consumption, anemia, hypertension, diabetes  
 241 mellitus, ACEI, CCB, diuretics, ASA, anesthesia method, emergency, surgical grade, amount of fluid  
 242 infusion and out, intraoperative erythrocyte transfusion, and amount of blood loss.

243 Model 3: Model 2 plus ARB, eGFR, and operative time

244 Model 4: Model 3 plus intraoperative hypotension, and vasoactive drugs.

245

246 For patients with an eGFR  $<90 \text{ mL} \cdot \text{min}^{-1} \cdot 1.73 \text{ m}^{(2)}^{-1}$  or who were non-smokers, single-  
 247 dose parecoxib (40 mg or 80 mg) was associated with a lower incidence of postoperative  
 248 AKI (Table 4). Similar results were obtained with the adjusted models. Postoperative AKI  
 249 risk also reduced in patients with blood loss  $<1000\text{ml}$  (OR, 0.55; 95%CI, 0.37-0.83) and  
 250 non-hypotension (OR, 0.57; 95%CI, 0.38-0.84).

251

## 252 Discussion

253 According to the surgery type and AKI diagnostic criteria, the incidence of  
 254 postoperative AKI ranges from 1.0% to 31%[13-15], and our study revealed an incidence



1  
2  
3  
4 255 of 6.06% in the study population of patients aged 18–60 years who underwent non-cardiac  
5  
6 256 surgery. The incidence was similar to that in the recently published data by Nishimoto  
7  
8  
9 257 (6%, non-cardiac surgery; mean age, 63 years)[16]. In our study, the univariable analysis  
10  
11 258 identified male sex, smoking, alcohol consumption, anemia, hypertension, diabetes  
12  
13  
14 259 mellitus, ACEI use, CCB use, diuretic use, eGFR, ASA grade III–V, anesthesia mode,  
15  
16  
17 260 emergency, surgical grade 4, duration of the operation (>120 min), incidence of  
18  
19 261 intraoperative hypotension, intraoperative erythrocyte transfusion (>100 mL), amount of  
20  
21  
22 262 blood loss (>600 mL), and vasoactive drug use to be associated with AKI, some of which  
23  
24  
25 263 are similar to previously published data by Mathis MR (2020) and Cho E (2014) [17 18].

26  
27 264 However, age and BMI did not correlate with AKI in our study, which is inconsistent  
28  
29  
30 265 with the findings from Wang J's studies[19]. This discrepancy can be explained by the  
31  
32 266 difference in mean age and BMI between the studies, which were both lower in our study  
33  
34  
35 267 population. The results of the sensitivity analysis suggested that single-dose (40 mg or 80  
36  
37 268 mg) parecoxib might have potential protective effects against postoperative AKI in  
38  
39  
40 269 differentially ranked AKI. eGFR <90 mL·min<sup>-1</sup>·1.73 m<sup>(2)</sup><sup>-1</sup> represented the population  
41  
42  
43 270 with preoperative glomerular filtration impairment, while non-hypertension and blood-  
44  
45  
46 271 loss<1000ml, represented people with relatively stable intraoperative circulation and  
47  
48 272 relatively good renal perfusion pressure. The subgroup analysis showed parecoxib might  
49  
50  
51 273 reduce the AKI risk in these patients.

52  
53 274 Numerous studies have investigated the association between NSAIDs and AKI[10 20].  
54  
55  
56 275 An updated Cochrane systematic review and meta-analysis published by Bell S in 2018  
57  
58 276 indicated that NSAIDs have uncertain effects on the rate of AKI and may slightly increase  
59  
60

1  
2  
3  
4 277 serum creatinine in patients with normal kidney function following surgery[20]. In  
5  
6 278 another meta-analysis (Ungprasert P, 2015), a significant risk of AKI was observed with  
7  
8  
9 279 most traditional NSAIDs but not with two COX-2 specific inhibitors (rofecoxib and  
10  
11 280 celecoxib) [10]. A pooled analysis of 28 randomized clinical trials investigating the safety  
12  
13  
14 281 of parecoxib for the management of postoperative pain showed that its associated risk of  
15  
16 282 renal failure and impairment was 1%, similar to that with the placebo (0.9%)[21].

17  
18  
19 283 However, our study indicated that intraoperative single-dose parecoxib (40 mg or 80  
20  
21 284 mg) might provide potential protective effects against postoperative AKI in patients aged  
22  
23  
24 285 18–60 years who underwent non-cardiac surgery. Moreover, this is not the first time a  
25  
26  
27 286 renoprotective effect has been postulated for parecoxib. For example, the study of Takaku  
28  
29 287 M et al. also showed that a single-dose of parecoxib (20 mg/kg) reduced tubular renal  
30  
31 288 injury and serum inflammatory cytokines level (interleukin (IL)-1 $\alpha$ , IL- $\beta$ , IL6, and tumor  
32  
33 289 necrosis factor (TNF)- $\alpha$ ) in an ischemic rat model[22]. Moreover, several animal  
34  
35  
36 290 studies(Takaku M 2018, Feitoza CQ 2005, Feitoza CQ 2004, Candelario-Jalil E 2007)  
37  
38 291 have suggested that pretreatment with COX-2 inhibitors improved outcomes in function  
39  
40  
41 292 and histology in not only the kidney but also other organs after ischemia[22-25]. To the  
42  
43  
44 293 best of our knowledge, this is the first clinical report to suggest that single-dose (40 mg  
45  
46 294 or 80 mg) parecoxib may be renoprotective in patients aged 18–60 years who underwent  
47  
48  
49 295 non-cardiac surgery.

50  
51  
52  
53 296 The mechanism by which parecoxib decreases the risk of postoperative AKI is  
54  
55  
56 297 unknown. However, one possible underlying mechanism is likely related to inflammation.  
57  
58  
59 298 A previous study of Murashima M et al. showed that inflammation is a predictor of  
60

1  
2  
3  
4 299 postoperative AKI and a mediator of increased mortality after AKI in non-cardiac surgery  
5  
6 300 [26]. However, perioperative parecoxib reduced local and systemic inflammatory  
7  
8  
9 301 cytokines postoperatively[27 28]. Another possible mechanism is associated with  
10  
11 302 hemodynamic change. COX-1 contributes to controlling renal GFR, whereas COX-2 is  
12  
13  
14 303 involved in sodium and water excretion[7]. COX-2 inhibitors are associated with mild  
15  
16  
17 304 hypertension owing to modest sodium retention in the first few days of therapy[29]. The  
18  
19 305 renoprotective mechanism of parecoxib may be related to its anti-inflammatory effects  
20  
21  
22 306 and sodium regulation.

23  
24  
25 307 Our study had some limitations that are worth mentioning. First, this was a  
26  
27 308 retrospective single-center observational study; thus, it may have had some selection bias.  
28  
29  
30 309 Second, the timing of the serum creatinine measurement was based on clinical discretion;  
31  
32 310 thus, it may vary with different doctors. Third, we simply chose patients aged 18-60 years  
33  
34  
35 311 who underwent non-cardiac surgery as the target to research. Fourthly, due to the nature  
36  
37 312 of the retrospective study, some unknown or unmeasured confounders, and those  
38  
39  
40 313 excluded patients who had missing data may interfere the outcomes. Therefore, our  
41  
42  
43 314 results should be extrapolated cautiously.

44  
45 315

## 46 47 48 316 **Conclusions**

49  
50 317 In conclusion, in non-cardiac surgery patients, a single dose of parecoxib (40 mg or 80  
51  
52 318 mg) may slightly hint at a protective effect against postoperative AKI in those aged 18–  
53  
54  
55 319 60 years. However, these short-term effects may not represent the benefit of this drug in  
56  
57  
58 320 the long term. Furthermore, more comprehensive studies are needed to confirm the effects  
59  
60

1  
2  
3  
4 321 of parecoxib on the risk of postoperative AKI.

5  
6 322

7  
8  
9 323 **Figure legends**

10  
11 324 Fig 1. Enrollment of patients undergoing non-cardiac surgery. The numbers in brackets  
12  
13  
14 325 represent patients excluded for the reasons described earlier.

15  
16  
17 326

18  
19 327 **Acknowledgments**

20  
21  
22 328 We thank Dr. Xing Liu for technical consultation.

23  
24  
25 329

26  
27 330 **Author's Contributions**

28  
29  
30 331 Yongzhong Tang helped in designing the study, analyzing and interpreting the data, and  
31  
32 332 drafting and revising the manuscript. Pingping Zeng and Yan Liao helped in collecting,  
33  
34  
35 333 analyzing and interpreting the data, and drafting and revising the manuscript. Zheng Qin,  
36  
37 334 Hao Zhang and Bo Li helped in analyzing and interpreting the data. Wen Ouyang helped  
38  
39  
40 335 in Supervising, Funding acquisition and drafting and revising the manuscript. Dan Li  
41  
42 336 helped in designing the study, analyzing and interpreting the data, and drafting and  
43  
44  
45 337 revising the manuscript.

46  
47  
48 338

49  
50 339 **Funding:** This work was supported by the National Key R&D Program of China (grant  
51  
52  
53 340 number 2018YFC2001800), Project of Health and Health Commission of Hunan  
54  
55  
56 341 Province (grant number 20201802), Hunan Province Key Laboratory Project (grant  
57  
58 342 number 2018TP1009), and the Research and Innovation Funds from Xiangya Bigdata  
59  
60

---

343 Foundation of Central South University.

344

345 **Competing interests:** The authors declare they have no competing interests.

346

347 **Patient Consent for publication:** Not applicable.

348

349 **Ethics approval:** This study was approved by the ethics committee of the third Xiangya  
350 hospital of Central South University (2020S264). Because of the observational nature of  
351 the study, informed consent was waived.

352

353 **Data sharing statement:** The data used and analyzed in this study are available from  
354 the corresponding author on reasonable request.

---

## REFERENCES

1. Romagnoli S, Ricci Z. Postoperative acute kidney injury. *Minerva anesthesiologica* 2015;**81**(6):684-96
2. Ortega-Loubon C, Fernandez-Molina M, Carrascal-Hinojal Y, et al. Cardiac surgery-associated acute kidney injury. *Annals of cardiac anaesthesia* 2016;**19**(4):687-98 doi: 10.4103/0971-9784.191578[published Online First: Epub Date]].
3. Bell S, Ross VC, Zealley KA, et al. Management of post-operative acute kidney injury. *QJM : monthly journal of the Association of Physicians* 2017;**110**(11):695-700 doi: 10.1093/qjmed/hcw175[published Online First: Epub Date]].
4. Iyigun M, Aykut G, Tosun M, et al. Perioperative risk factors of acute kidney injury after non-cardiac surgery: A multicenter, prospective, observational study in patients with low grade American Society of Anesthesiologists physical status. *American journal of surgery* 2019;**218**(3):457-61 doi: 10.1016/j.amjsurg.2019.01.031[published Online First: Epub Date]].
5. Turan A, Cohen B, Adegboye J, et al. Mild Acute Kidney Injury after Noncardiac Surgery Is Associated with Long-term Renal Dysfunction: A Retrospective Cohort Study. *Anesthesiology* 2020 doi: 10.1097/ALN.0000000000003109[published Online First: Epub Date]].
6. Cuniberti B, Odore R, Barbero R, et al. In vitro and ex vivo pharmacodynamics of selected non-steroidal anti-inflammatory drugs in equine whole blood. *Veterinary journal* 2012;**191**(3):327-33 doi: 10.1016/j.tvjl.2011.03.016[published Online First: Epub Date]].
7. Lucas GNC, Leitao ACC, Alencar RL, et al. Pathophysiological aspects of nephropathy caused by non-steroidal anti-inflammatory drugs. *Jornal brasileiro de nefrologia : 'orgao oficial de Sociedades Brasileira e Latino-Americana de Nefrologia* 2019;**41**(1):124-30 doi: 10.1590/2175-8239-JBN-2018-0107[published Online First: Epub Date]].
8. Mitchell JA, Warner TD. COX isoforms in the cardiovascular system: understanding the activities of non-steroidal anti-inflammatory drugs. *Nature reviews Drug discovery* 2006;**5**(1):75-86 doi: 10.1038/nrd1929[published Online First: Epub Date]].
9. Sriperumbuduri S, Hiremath S. The case for cautious consumption: NSAIDs in chronic kidney disease. *Current opinion in nephrology and hypertension* 2019;**28**(2):163-70 doi: 10.1097/MNH.0000000000000473[published Online First: Epub Date]].
10. Ungprasert P, Cheungpasitporn W, Crowson CS, et al. Individual non-steroidal anti-inflammatory drugs and risk of acute kidney injury: A systematic review and meta-analysis of observational studies. *European journal of internal medicine* 2015;**26**(4):285-91 doi: 10.1016/j.ejim.2015.03.008[published Online First: Epub Date]].
11. Amabile CM, Spencer AP. Parecoxib for parenteral analgesia in postsurgical patients. *The Annals of pharmacotherapy* 2004;**38**(5):882-6 doi: 10.1345/aph.1D283[published Online First: Epub Date]].
12. Khwaja A. KDIGO Clinical Practice Guidelines for Acute Kidney Injury. *Nephron Clin Pract* 2012;**120**(4):C179-C84 doi: 10.1159/000339789[published Online First: Epub Date]].
13. Kim M, Brady JE, Li G. Variations in the risk of acute kidney injury across intraabdominal surgery procedures. *Anesthesia and analgesia* 2014;**119**(5):1121-32 doi: 10.1213/ANE.0000000000000425[published Online First: Epub Date]].
14. Biteker M, Dayan A, Tekkesin AI, et al. Incidence, risk factors, and outcomes of perioperative acute kidney injury in noncardiac and nonvascular surgery. *American journal of surgery* 2014;**207**(1):53-9 doi: 10.1016/j.amjsurg.2013.04.006[published Online First: Epub Date]].
15. Vaara ST, Bellomo R. Postoperative renal dysfunction after noncardiac surgery. *Current opinion in*

- critical care 2017;**23**(5):440-46 doi: 10.1097/MCC.0000000000000439[published Online First: Epub Date]].
16. Nishimoto M, Murashima M, Kokubu M, et al. Positive association between intra-operative fluid balance and post-operative acute kidney injury in non-cardiac surgery: the NARA-AKI cohort study. *Journal of nephrology* 2020;**33**(3):561-68 doi: 10.1007/s40620-019-00688-x[published Online First: Epub Date]].
17. Mathis MR, Naik BI, Freundlich RE, et al. Preoperative Risk and the Association between Hypotension and Postoperative Acute Kidney Injury. *Anesthesiology* 2019 doi: 10.1097/ALN.0000000000003063[published Online First: Epub Date]].
18. Cho E, Kim SC, Kim MG, et al. The incidence and risk factors of acute kidney injury after hepatobiliary surgery: a prospective observational study. *Bmc Nephrol* 2014;**15** doi: Artn 169 10.1186/1471-2369-15-169[published Online First: Epub Date]].
19. Wang J, Yu W, Zhai G, et al. Independent risk factors for postoperative AKI and the impact of the AKI on 30-day postoperative outcomes in patients with type A acute aortic dissection: an updated meta-analysis and meta-regression. *Journal of thoracic disease* 2018;**10**(5):2590-98 doi: 10.21037/jtd.2018.05.47[published Online First: Epub Date]].
20. Bell S, Rennie T, Marwick CA, et al. Effects of peri-operative nonsteroidal anti-inflammatory drugs on post-operative kidney function for adults with normal kidney function. *The Cochrane database of systematic reviews* 2018;**11**:CD011274 doi: 10.1002/14651858.CD011274.pub2[published Online First: Epub Date]].
21. Schug SA, Parsons B, Li C, et al. The safety profile of parecoxib for the treatment of postoperative pain: a pooled analysis of 28 randomized, double-blind, placebo-controlled clinical trials and a review of over 10 years of postauthorization data. *Journal of pain research* 2017;**10**:2451-59 doi: 10.2147/JPR.S136052[published Online First: Epub Date]].
22. Takaku M, da Silva AC, Iritsu NI, et al. Effects of a Single Dose of Parecoxib on Inflammatory Response and Ischemic Tubular Injury Caused by Hemorrhagic Shock in Rats. *Pain research and treatment* 2018;**2018**:8375746 doi: 10.1155/2018/8375746[published Online First: Epub Date]].
23. Feitoza CQ, Camara NO, Pinheiro HS, et al. Cyclooxygenase 1 and/or 2 blockade ameliorates the renal tissue damage triggered by ischemia and reperfusion injury. *International immunopharmacology* 2005;**5**(1):79-84 doi: 10.1016/j.intimp.2004.09.024[published Online First: Epub Date]].
24. Feitoza CQ, Sanders H, Cenedeze M, et al. Pretreatment with indomethacin protects from acute renal failure following ischemia-reperfusion injury. *Transplant P* 2002;**34**(7):2979-80 doi: Pii S0041-1345(02)03507-8 Doi 10.1016/S0041-1345(02)03507-8[published Online First: Epub Date]].
25. Candelario-Jalil E, Gonzalez-Falcon A, Garcia-Cabrera M, et al. Post-ischaemic treatment with the cyclooxygenase-2 inhibitor nimesulide reduces blood-brain barrier disruption and leukocyte infiltration following transient focal cerebral ischaemia in rats. *Journal of neurochemistry* 2007;**100**(4):1108-20 doi: 10.1111/j.1471-4159.2006.04280.x[published Online First: Epub Date]].
26. Murashima M, Nishimoto M, Kokubu M, et al. Inflammation as a predictor of acute kidney injury and mediator of higher mortality after acute kidney injury in non-cardiac surgery. *Scientific reports* 2019;**9**(1):20260 doi: 10.1038/s41598-019-56615-4[published Online First: Epub Date]].
27. Chong SJ, Wong YC, Wu J, et al. Parecoxib reduces systemic inflammation and acute lung injury in burned animals with delayed fluid resuscitation. *International journal of inflammation*

- 1  
2  
3 442 2014;**2014**:972645 doi: 10.1155/2014/972645[published Online First: Epub Date]].
- 4 443 28. Zhu Y, Wang S, Wu H, et al. Effect of perioperative parecoxib on postoperative pain and local  
5 444 inflammation factors PGE2 and IL-6 for total knee arthroplasty: a randomized, double-blind,  
6 445 placebo-controlled study. *European journal of orthopaedic surgery & traumatology : orthopedie*  
7 446 *traumatologie* 2014;**24**(3):395-401 doi: 10.1007/s00590-013-1203-4[published Online First:  
8 447 Epub Date]].
- 9  
10  
11 448 29. Hegazy R, Alashhab M, Amin M. Cardiorenal Effects of Newer NSAIDs (Celecoxib) versus Classic NSAIDs  
12 449 (Ibuprofen) in Patients with Arthritis. *Journal of toxicology* 2011;**2011**:862153 doi:  
13 450 10.1155/2011/862153[published Online First: Epub Date]].

14  
15 451  
16  
17  
18  
19  
20  
21  
22  
23  
24  
25  
26  
27  
28  
29  
30  
31  
32  
33  
34  
35  
36  
37  
38  
39  
40  
41  
42  
43  
44  
45  
46  
47  
48  
49  
50  
51  
52  
53  
54  
55  
56  
57  
58  
59  
60

For peer review only



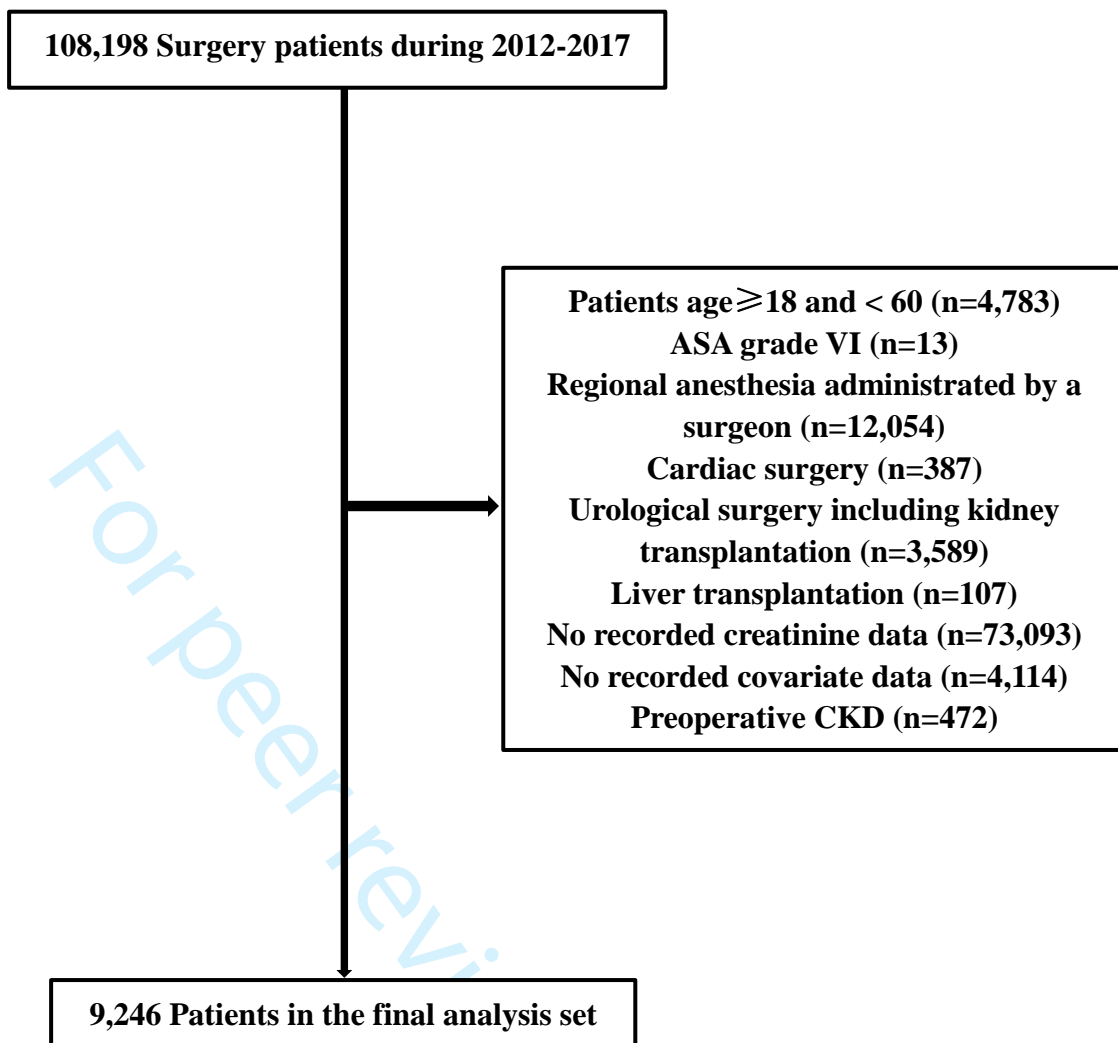

**Fig 1**

**Supplemental Table 1.** Baseline characteristics of patients aged 18–60 years with and without acute kidney injury (AKI)

| Clinical features   | without AKI<br>(n=8686) | With AKI<br>(n=560) | p-value |
|---------------------|-------------------------|---------------------|---------|
| Age (years)         | 44.25±10.43             | 45.06±10.18         | 0.074   |
| BMI                 | 22.93±4.93              | 22.54±3.83          | 0.07    |
| eGFR                | 101.98±16.38            | 94.41±19.78         | <0.001  |
| Male                | 4267 (49.13%)           | 300 (53.57%)        | 0.041   |
| Smoking             | 1213 (13.97%)           | 105 (18.75%)        | 0.002   |
| Alcohol consumption | 822 (9.46%)             | 74 (13.21%)         | 0.004   |
| Anemia              | 1538 (17.71%)           | 161 (28.75%)        | <0.001  |
| Hypertension        | 1884 (21.69%)           | 211 (37.68%)        | <0.001  |
| Diabetes mellitus   | 509 (5.86%)             | 52 (9.29%)          | <0.001  |
| ACEI                | 189 (2.18%)             | 21 (3.75%)          | 0.015   |
| ARB                 | 116 (1.34%)             | 13 (2.32%)          | 0.054   |
| CCB                 | 1125 (12.95%)           | 119 (21.25%)        | <0.001  |
| Diuretics           | 77 (0.89%)              | 19 (3.39%)          | <0.001  |
| ASA grade           |                         |                     | <0.001  |
| I–II                | 6633 (76.36%)           | 317 (56.61%)        |         |
| III–V               | 2053 (23.64%)           | 243 (43.39%)        |         |
| Anesthesia method   |                         |                     | <0.001  |

|                            |               |              |        |
|----------------------------|---------------|--------------|--------|
| General anesthesia         | 7735 (89.05%) | 531 (94.82%) |        |
| Non-general anesthesia     | 951 (10.95%)  | 29 (5.18%)   |        |
| Emergency                  | 1395 (16.06%) | 130 (23.21%) | <0.001 |
| Surgical Grade             |               |              | <0.001 |
| 1                          | 245 (2.82%)   | 14 (2.50%)   |        |
| 2                          | 2746 (31.61%) | 118 (21.07%) |        |
| 3                          | 5349 (61.58%) | 386 (68.93%) |        |
| 4                          | 346 (3.98%)   | 42 (7.50%)   |        |
| Operative time (min)       |               |              | <0.001 |
| ≤60                        | 1338 (15.4%)  | 63 (11.25%)  |        |
| 61–120                     | 2176 (25.05%) | 111 (19.82%) |        |
| 121–180                    | 2032 (23.39%) | 135 (24.11%) |        |
| >180                       | 3140 (36.15%) | 251 (44.82%) |        |
| Intraoperative erythrocyte |               |              | <0.001 |
| Transfusion, mL (%)        |               |              |        |
| <100                       | 6735 (77.54)  | 339 (60.54)  |        |
| 100–600                    | 868 (9.99)    | 82 (14.64)   |        |
| 601–1000                   | 508 (5.85)    | 42 (7.50)    |        |
| >1000                      | 575 (6.62)    | 97 (17.32)   |        |
| Amount of Blood loss, mL   |               |              | <0.001 |
| (%)                        |               |              |        |
| <100                       | 2623 (30.20)  | 131 (23.39)  |        |

|                                          |                             |                              |        |
|------------------------------------------|-----------------------------|------------------------------|--------|
| 100–600                                  | 4771 (54.93)                | 292 (52.14)                  |        |
| 601–1000                                 | 670 (7.71)                  | 60 (10.71)                   |        |
| >1000                                    | 622 (7.16)                  | 77 (13.75)                   |        |
| Amount of fluid infusion<br>(10 mL/24 h) | 916.67 (625.00–<br>1432.29) | 1125.00 (703.12–<br>1604.17) | <0.001 |
| Amount of fluid out<br>(10 mL/24 h)      | 333.33 (145.83–541.67)      | 375.00 (208.33–<br>687.50)   | <0.001 |
| Intraoperative Hypotension               | 930 (10.71%)                | 81 (14.46%)                  | 0.006  |
| Vasoactive drugs                         | 664 (7.64%)                 | 71 (12.68%)                  | <0.001 |
| Parecoxib                                | 934 (10.75%)                | 39 (6.96%)                   | 0.005  |
| Admission to ICU                         | 376 (4.33%)                 | 57 (10.18%)                  | <0.001 |
| Death                                    | 32 (0.37%)                  | 26 (4.64%)                   | <0.001 |

AKI: acute kidney injury, BMI: body mass index, eGFR: estimated glomerular filtration rate, ACEI: angiotensin-converting enzyme inhibitors, ARB: angiotensin receptor blockers, CCB: calcium-channel blockers, ASA: American Society of Anesthesiologists, Non-general anesthesia include neuraxial anesthesia (spinal or epidural) and nerve block anesthesia, ICU: intensive care unit. Data are expressed as number of patients (%) or mean  $\pm$  standard deviation (SD).

**STROBE 2007 (v4) Statement—Checklist of items that should be included in reports of *cohort studies***

| Section/Topic                | Item # | Recommendation                                                                                                                                                                       | Reported on page # |
|------------------------------|--------|--------------------------------------------------------------------------------------------------------------------------------------------------------------------------------------|--------------------|
| <b>Title and abstract</b>    | 1      | (a) Indicate the study's design with a commonly used term in the title or the abstract                                                                                               | 1-2                |
|                              |        | (b) Provide in the abstract an informative and balanced summary of what was done and what was found                                                                                  | 2                  |
| <b>Introduction</b>          |        |                                                                                                                                                                                      |                    |
| Background/rationale         | 2      | Explain the scientific background and rationale for the investigation being reported                                                                                                 | 4-5                |
| Objectives                   | 3      | State specific objectives, including any prespecified hypotheses                                                                                                                     | 5                  |
| <b>Methods</b>               |        |                                                                                                                                                                                      |                    |
| Study design                 | 4      | Present key elements of study design early in the paper                                                                                                                              | 5                  |
| Setting                      | 5      | Describe the setting, locations, and relevant dates, including periods of recruitment, exposure, follow-up, and data collection                                                      | 5-6                |
| Participants                 | 6      | (a) Give the eligibility criteria, and the sources and methods of selection of participants. Describe methods of follow-up                                                           | 5-6                |
|                              |        | (b) For matched studies, give matching criteria and number of exposed and unexposed                                                                                                  | -                  |
| Variables                    | 7      | Clearly define all outcomes, exposures, predictors, potential confounders, and effect modifiers. Give diagnostic criteria, if applicable                                             | 6                  |
| Data sources/<br>measurement | 8*     | For each variable of interest, give sources of data and details of methods of assessment (measurement). Describe comparability of assessment methods if there is more than one group | 6                  |
| Bias                         | 9      | Describe any efforts to address potential sources of bias                                                                                                                            | 5                  |
| Study size                   | 10     | Explain how the study size was arrived at                                                                                                                                            | 5                  |
| Quantitative variables       | 11     | Explain how quantitative variables were handled in the analyses. If applicable, describe which groupings were chosen and why                                                         | 7                  |
| Statistical methods          | 12     | (a) Describe all statistical methods, including those used to control for confounding                                                                                                | 6-7                |
|                              |        | (b) Describe any methods used to examine subgroups and interactions                                                                                                                  | 7                  |
|                              |        | (c) Explain how missing data were addressed                                                                                                                                          | 6-7                |
|                              |        | (d) If applicable, explain how loss to follow-up was addressed                                                                                                                       | 7                  |
|                              |        | (e) Describe any sensitivity analyses                                                                                                                                                | 7                  |
| <b>Results</b>               |        |                                                                                                                                                                                      |                    |

|                          |     |                                                                                                                                                                                                              |       |
|--------------------------|-----|--------------------------------------------------------------------------------------------------------------------------------------------------------------------------------------------------------------|-------|
| Participants             | 13* | (a) Report numbers of individuals at each stage of study—eg numbers potentially eligible, examined for eligibility, confirmed eligible, included in the study, completing follow-up, and analysed            | 7     |
|                          |     | (b) Give reasons for non-participation at each stage                                                                                                                                                         | 7     |
|                          |     | (c) Consider use of a flow diagram                                                                                                                                                                           | 7     |
| Descriptive data         | 14* | (a) Give characteristics of study participants (eg demographic, clinical, social) and information on exposures and potential confounders                                                                     | 8     |
|                          |     | (b) Indicate number of participants with missing data for each variable of interest                                                                                                                          | 7     |
|                          |     | (c) Summarise follow-up time (eg, average and total amount)                                                                                                                                                  | 7     |
| Outcome data             | 15* | Report numbers of outcome events or summary measures over time                                                                                                                                               | 8-11  |
| Main results             | 16  | (a) Give unadjusted estimates and, if applicable, confounder-adjusted estimates and their precision (eg, 95% confidence interval). Make clear which confounders were adjusted for and why they were included | 14-17 |
|                          |     | (b) Report category boundaries when continuous variables were categorized                                                                                                                                    | 8-17  |
|                          |     | (c) If relevant, consider translating estimates of relative risk into absolute risk for a meaningful time period                                                                                             | -     |
| Other analyses           | 17  | Report other analyses done—eg analyses of subgroups and interactions, and sensitivity analyses                                                                                                               | 18-19 |
| <b>Discussion</b>        |     |                                                                                                                                                                                                              |       |
| Key results              | 18  | Summarise key results with reference to study objectives                                                                                                                                                     | 20-22 |
| <b>Limitations</b>       |     |                                                                                                                                                                                                              |       |
| Interpretation           | 20  | Give a cautious overall interpretation of results considering objectives, limitations, multiplicity of analyses, results from similar studies, and other relevant evidence                                   | 22    |
| Generalisability         | 21  | Discuss the generalisability (external validity) of the study results                                                                                                                                        | -     |
| <b>Other information</b> |     |                                                                                                                                                                                                              |       |
| Funding                  | 22  | Give the source of funding and the role of the funders for the present study and, if applicable, for the original study on which the present article is based                                                | 23    |

\*Give information separately for cases and controls in case-control studies and, if applicable, for exposed and unexposed groups in cohort and cross-sectional studies.

**Note:** An Explanation and Elaboration article discusses each checklist item and gives methodological background and published examples of transparent reporting. The STROBE checklist is best used in conjunction with this article (freely available on the Web sites of PLoS Medicine at <http://www.plosmedicine.org/>, Annals of Internal Medicine at <http://www.annals.org/>, and Epidemiology at <http://www.epidem.com/>). Information on the STROBE Initiative is available at [www.strobe-statement.org](http://www.strobe-statement.org).

# BMJ Open

## Correlation between perioperative parecoxib use and postoperative acute kidney injury in patients undergoing non-cardiac surgery: A retrospective cohort analysis

|                                 |                                                                                                                                                                                                                                                                                                                                                                                                                                                                                                                                                                                                                                                 |
|---------------------------------|-------------------------------------------------------------------------------------------------------------------------------------------------------------------------------------------------------------------------------------------------------------------------------------------------------------------------------------------------------------------------------------------------------------------------------------------------------------------------------------------------------------------------------------------------------------------------------------------------------------------------------------------------|
| Journal:                        | <i>BMJ Open</i>                                                                                                                                                                                                                                                                                                                                                                                                                                                                                                                                                                                                                                 |
| Manuscript ID                   | bmjopen-2020-047840.R2                                                                                                                                                                                                                                                                                                                                                                                                                                                                                                                                                                                                                          |
| Article Type:                   | Original research                                                                                                                                                                                                                                                                                                                                                                                                                                                                                                                                                                                                                               |
| Date Submitted by the Author:   | 13-Jul-2021                                                                                                                                                                                                                                                                                                                                                                                                                                                                                                                                                                                                                                     |
| Complete List of Authors:       | Tang, Yong-Zhong; Central South University Third Xiangya Hospital, Anesthesiology<br>Zeng, Pingping; Central South University Third Xiangya Hospital, Department of Anesthesiology<br>Liao, Yan; Central South University Third Xiangya Hospital, Department of Anesthesiology<br>Qin, Zheng; Hunan University College of Computer Science and Electronic Engineering<br>Zhang, Hao; Institute of Microelectronics of Chinese Academy of Sciences<br>Li, Bo; Central South University Third Xiangya Hospital<br>Ouyang, Wen; Central South University Third Xiangya Hospital<br>li, dan; Central South University, Department of Anesthesiology |
| <b>Primary Subject Heading</b>: | Urology                                                                                                                                                                                                                                                                                                                                                                                                                                                                                                                                                                                                                                         |
| Secondary Subject Heading:      | Surgery, Pharmacology and therapeutics, Anaesthesia                                                                                                                                                                                                                                                                                                                                                                                                                                                                                                                                                                                             |
| Keywords:                       | Adult anaesthesia < ANAESTHETICS, Acute renal failure < NEPHROLOGY, Pain management < ANAESTHETICS                                                                                                                                                                                                                                                                                                                                                                                                                                                                                                                                              |
|                                 |                                                                                                                                                                                                                                                                                                                                                                                                                                                                                                                                                                                                                                                 |

SCHOLARONE™  
Manuscripts



I, the Submitting Author has the right to grant and does grant on behalf of all authors of the Work (as defined in the below author licence), an exclusive licence and/or a non-exclusive licence for contributions from authors who are: i) UK Crown employees; ii) where BMJ has agreed a CC-BY licence shall apply, and/or iii) in accordance with the terms applicable for US Federal Government officers or employees acting as part of their official duties; on a worldwide, perpetual, irrevocable, royalty-free basis to BMJ Publishing Group Ltd ("BMJ") its licensees and where the relevant Journal is co-owned by BMJ to the co-owners of the Journal, to publish the Work in this journal and any other BMJ products and to exploit all rights, as set out in our [licence](#).

The Submitting Author accepts and understands that any supply made under these terms is made by BMJ to the Submitting Author unless you are acting as an employee on behalf of your employer or a postgraduate student of an affiliated institution which is paying any applicable article publishing charge ("APC") for Open Access articles. Where the Submitting Author wishes to make the Work available on an Open Access basis (and intends to pay the relevant APC), the terms of reuse of such Open Access shall be governed by a Creative Commons licence – details of these licences and which [Creative Commons](#) licence will apply to this Work are set out in our licence referred to above.

Other than as permitted in any relevant BMJ Author's Self Archiving Policies, I confirm this Work has not been accepted for publication elsewhere, is not being considered for publication elsewhere and does not duplicate material already published. I confirm all authors consent to publication of this Work and authorise the granting of this licence.



---

1 **Correlation between perioperative parecoxib use and postoperative acute kidney**  
2 **injury in patients undergoing non-cardiac surgery: A retrospective cohort analysis**

3

4 Yongzhong Tang, M.D.<sup>1</sup>, Pingping Zeng, M.D.<sup>1</sup>, Yan Liao, M.D.<sup>1</sup>, Zheng Qin, Ph.D.<sup>2</sup>,  
5 Hao Zhang, Ph.D.<sup>3</sup>, Bo Li, M.D.<sup>4</sup>, Wen Ouyang, Ph.D.<sup>1</sup>, and Dan Li, Ph.D.<sup>1\*</sup>

6 <sup>1</sup> Department of Anesthesiology, The Third Xiangya Hospital, Central South University,  
7 Changsha, China

8 <sup>2</sup> College of Computer Science and Electronic Engineering, Hunan University, Changsha,  
9 China

10 <sup>3</sup> Institute of Microelectronics of Chinese of Science, Beijing, China

11 <sup>4</sup>Operation Room, The Third Xiangya Hospital, Central South University, Changsha,  
12 China

13  
14 **Corresponding author:** Dan Li, Department of Anesthesiology, The Third Xiangya  
15 Hospital, Central South University, 138 Tongzipo Road, Changsha, Hunan , 410013,  
16 China

17 Tel: +8613574871720, Fax: +8673188618151, E-mail: [danfuer623@163.com](mailto:danfuer623@163.com)

18

---

## 19 Abstract

20 **Objective:** The association of nonsteroidal anti-inflammatory drugs with postoperative acute kidney  
21 injury is controversial. However, there are few studies focusing on the association between parecoxib  
22 and postoperative acute kidney injury. Our study aimed at the possible correlation between the  
23 intraoperative administration of COX-2 inhibitors parecoxib and perioperative AKI.

24 **Design:** A retrospective cohort study

25 **Setting:** Third Xiangya Hospital of Central South University in Hunan Province, China

26 **Participants:** The electronic medical records and laboratory results were obtained from 9,246 adult  
27 patients (18–60 years) undergoing non-cardiac surgery performed between January 1, 2012 to August  
28 31, 2017. Study groups were treated with or without parecoxib.

29 **Interventions:** Univariable analysis identified demographic, preoperative laboratory, and  
30 intraoperative factors associated with acute kidney injury. Logistic stepwise regression was used to  
31 calculate the adjusted odds ratio of parecoxib and acute kidney injury association.

32 **Results:** The incidence of acute kidney injury was lower in the parecoxib-administered group (4%)  
33 than that in the group without parecoxib (6.3%,  $p = 0.005$ ). In the Multivariable regression analysis,  
34 postoperative acute kidney injury risk reduced by 39% (OR, 0.61; 95% CI, 0.43–0.87) in the  
35 parecoxib-administered group after adjusting for interference factors. Sensitivity analysis showed that  
36 postoperative AKI risk reduced in four subgroups: eGFR<90 mL·min<sup>-1</sup>·1.73m<sup>(2)</sup><sup>-1</sup> (OR, 0.49; 95%CI,  
37 0.29-0.82), non-smoker (OR, 0.55; 95%CI, 0.37-0.83), blood loss <1000ml (OR, 0.55; 95%CI, 0.37-  
38 0.83) and non-hypotension (OR, 0.57; 95%CI, 0.38-0.84).

39 **Conclusions:** Thus, parecoxib is associated with a modest reduction of postoperative acute kidney  
40 injury risk among adult patients undergoing non-cardiac surgery.

---

42 **Keywords:** acute kidney injury; parecoxib; non-cardiac surgery

43

44 **Strengths and limitations of this study:** Large study population including all adult patients (18–60  
45 years) undergoing non-cardiac surgery in Third Xiangya Hospital of Central South University in China  
46 between 2012 to 2017.□

47 Univariable analysis identified demographic, preoperative laboratory, and intraoperative factors  
48 associated with acute kidney injury.

49 Logistic stepwise regression was used to calculate the adjusted odds ratio of parecoxib and acute  
50 kidney injury association.

51 The selection bias and some unknown confounders in this retrospective single-center  
52 observational study may limit the generalizability of the results.

---

## 53 **Background**

54 Acute kidney injury (AKI), a long-recognized complication of surgery with a high  
55 incidence of morbidity and mortality, increases health care costs and length of hospital  
56 stay[1-3]. Even in patients undergoing non-cardiac surgery with low-grade American  
57 Society of Anesthesiologists (ASA) physical status such as ASA I–II, the incidence of  
58 postoperative AKI can reach 6%[4]. Mild kidney injury, such as a small increase in  
59 postoperative serum creatinine, is associated with renal dysfunction for as long as 1 to 2  
60 years after surgery [5].

61 Nonsteroidal anti-inflammatory drugs (NSAIDs) are commonly used perioperative  
62 anesthetic adjuvants, with anti-inflammatory and analgesic effects. The main mechanism  
63 of action of NSAIDs is the inhibition of cyclooxygenase (COX) enzymes, which can  
64 ultimately result in the reduction of prostanoids and thromboxan[6]. Within the kidneys,  
65 prostaglandins act as vasodilators to ensure adequate flow to the organ. NSAIDs inhibit  
66 this mechanism and can lead to acute kidney injury (AKI). The second form of NSAID-  
67 induced AKI is acute interstitial nephritis, which may be related to the prolonged  
68 exposure to NSAIDs, and interstitial infiltrates with the predominance of T-  
69 lymphocytes[7].

70 COX exists in two forms: COX-1, which is present in most body tissues including  
71 the stomach, intestines and COX-2, which is primarily found at sites of inflammation[8].  
72 Accumulating evidence suggests that traditional NSAIDs, such as aspirin and ibuprofen,  
73 are associated with acute and chronic gastrointestinal bleeding and kidney disease[9 10].  
74 These NSAIDs are nonselective COX (COX-1 and COX-2) inhibitors and their side

75 effects are mostly COX-1 related.

76 Parecoxib is a parenteral specific COX-2 inhibitor, which enhances its therapeutic gain  
77 with minimal adverse effects[6 11]. Parecoxib is used as a perioperative analgesic in over  
78 80 countries, however, clinical data about the effect of parecoxib on postoperative AKI  
79 are scarce. Therefore, it is important to establish its safety during the perioperative period.  
80 The aim of this study was to assess the correlation between the perioperative use of  
81 parecoxib and postoperative AKI in patients undergoing non-cardiac surgery.

82

### 83 **Methods**

#### 84 Design and selection criteria

85 This retrospective study was performed at the Third Xiangya Hospital of Central South  
86 University from January 1, 2012, to August 31, 2017. The inclusion criterion was patients  
87 aged 18–60 years who underwent non-cardiac surgery. The exclusion criteria were ASA  
88 grade VI, administration of local anesthesia, liver transplantation, cardiac surgery,  
89 urological surgery (including kidney transplantation), lack of serum creatinine or  
90 covariate data, and preoperative combined CKD, defined as estimate glomerular filtration  
91 rate (eGFR)  $<60 \text{ mL}\cdot\text{min}^{-1}\cdot 1.73\text{m}^{(2)-1}$ ,  $\geq 3$  months). Whether to use the Parecoxib or not  
92 was based on the doctor's preference. Parecoxib doses larger than 80 mg were not  
93 included because the routine dose is not more than 80 mg/day based on the drug  
94 instructions. The study was approved by the Ethics Committee of the Third Xiangya  
95 Hospital of Central South University (approval number 2020S264) that waived the need  
96 for informed consent because of the observational nature of the study.

1  
2  
3  
4 975  
6 98 Data collection

7  
8  
9 99 The following information was collected: 1) epidemiological data including age, sex,  
10  
11 and BMI; 2) individual history including preoperative complications and medication  
12  
13 history; 3) laboratory data including serum creatinine and eGFR calculated using the  
14  
15 Chronic Kidney Disease Epidemiology Collaboration (CKD-EPI) formula; 4)  
16  
17 intraoperative data including emergency, surgical grade, operative time, anesthesia  
18  
19 method, ASA grade, amount of fluid infusion and out, intraoperative erythrocyte  
20  
21 transfusion volume, amount of blood loss, intraoperative hypotension and vasoactive  
22  
23 drugs. 5) postoperative outcomes such as the occurrence of AKI, admission to ICU, and  
24  
25 mortality. All clinical data of the 9,246 patients who underwent non-cardiac surgery were  
26  
27 obtained by a retrospective review of the computerized patient record system of our  
28  
29 hospital.  
30  
31  
32  
33  
34  
35  
36  
37  
38  
39  
40  
41  
42

## 40 111 Definitions

43 112 Postoperative AKI was defined according to the Kidney Disease: Improving Global  
44  
45 Outcomes (KDIGO) 2012 creatinine criteria[12], as one of the following: an increase in  
46  
47 serum creatinine by  $\geq 0.3$  mg/dL within 48 h or a  $\geq 1.5$ -times increase in serum creatinine  
48  
49 from baseline within 7 postoperative days. The baseline serum creatinine level was  
50  
51 calculated using the lowest level within preoperative day 7. The primary outcome was the  
52  
53 impact of parecoxib on AKI, defined as AKI occurring within 7 postoperative days.  
54  
55  
56 117 Parecoxib administration was defined during the operative time. The surgical grade was  
57  
58  
59  
60

1  
2  
3  
4 119 classified using the surgical classification catalog constituted by the Chinese Ministry of  
5  
6 120 Health, published in 2018. Intraoperative hypotension was defined as mean arterial  
7  
8  
9 121 pressure (MAP) <65mmHg for a duration of at least 5 min.  
10  
11  
12 122

13  
14 123 Patient and public involvement

15  
16  
17 124 No patient involvement.  
18  
19  
20 125

21  
22 126 Statistical analysis

23  
24 127 All statistical analyses were performed using SAS version 9.4 software (SAS  
25  
26  
27 128 Institute, Inc., Cary, NC, USA) and CRAN R (v3.4.3). Missing data of covariates  
28  
29  
30 129 (including BMI and eGFR) were handled by a multiple imputation model. The  
31  
32  
33 130 continuous results are expressed as mean (SD), whereas categorical variables are  
34  
35  
36 131 expressed as numbers with percentages. The Kruskal-Wallis rank sum test was used to  
37  
38  
39 132 compare continuous variables between groups, whereas the chi-square ( $\chi^2$ ) test or  
40  
41  
42 133 Fisher's exact probability method was used for categorical variables. Univariable  
43  
44  
45 134 logistic regression analysis was used to identify epidemiological, preoperative  
46  
47  
48 135 laboratory, and intraoperative factors that were significantly associated with AKI  
49  
50  
51 136 development. The data were adjusted for potential confounders in multivariable  
52  
53  
54 137 regression models. To further validate these results in a number of specific populations  
55  
56  
57 138 that may influence the incidence of AKI. The sensitivity test was performed in the  
58  
59  
60 139 following four different subgroups: eGFR<90 mL·min<sup>-1</sup>·1.73m<sup>(2)</sup><sup>-1</sup>, non-smoker, blood  
60 140 loss <1000ml, and non-hypotension. The results of the classification variable are

1  
2  
3  
4 141 expressed as odds ratio (OR) or “Beta” and 95% CI; a p-value < 0.05 indicated a  
5  
6 142 statistically significant difference.  
7  
8

9 143

## 11 144 **Results**

14 145 Of the 108,198 records identified, those of 9,246 patients were included in the analysis  
15  
16  
17 146 (Fig. 1). Reasons for excluding patients were age <18 or >60 years (n = 4,783), ASA  
18  
19 147 grade VI (n = 13), regional anesthesia administered by a surgeon (n = 12,054), cardiac  
20  
21  
22 148 surgery (n = 387), urological surgery including kidney transplantation (n = 3,589), liver  
23  
24  
25 149 transplantation (n = 107), no recorded preoperative or postoperative creatinine data  
26  
27 150 (n=73,093), no recorded covariate data such as routine blood panel or infusion volume (n  
28  
29  
30 151 = 4,114), preoperative chronic kidney disease (CKD) (n = 472), and administration of  
31  
32 152 parecoxib doses >80 mg (n = 340).  
33

34  
35 153

## 37 154 **AKI**

40 155 The incidence of postoperative AKI was 6.06% (560/9,246). In the AKI group, the  
41  
42  
43 156 probability of admission to the intensive care unit (ICU) and mortality was 10.18% and  
44  
45 157 4.64%, respectively (Supplemental Table 1).  
46

47  
48 158 There were no differences in age, body mass index (BMI), angiotensin receptor blockers  
49  
50 159 (ARBs) use and intraoperative hypotension among patients with and without AKI  
51  
52  
53 160 (Supplemental Table 1). Significant differences between patients with AKI and without  
54  
55 161 AKI are shown in Supplemental Table 1 (all p < 0.05).  
56

57  
58 162  
59  
60



1  
2  
3  
4 163 Parecoxib

5  
6 164 Parecoxib was used in 10.5% (973/9,246) of patients (Table 1).

7  
8  
9 165

10  
11  
12 166 Table 1. Baseline characteristics of patients aged 18–60 years treated with and without  
13  
14  
15 167 parecoxib

| Clinical features   | Without parecoxib<br>(n=8273) | With parecoxib<br>(n=973) | p-value |
|---------------------|-------------------------------|---------------------------|---------|
| Age (year)          | 44.23±10.46                   | 44.89±10.04               | 0.06    |
| BMI                 | 22.89±4.99                    | 23.03±3.76                | 0.409   |
| eGFR                | 101.66±16.66                  | 101.56±16.23              | 0.858   |
| Male                | 4062 (49.1%)                  | 508 (52.2%)               | 0.063   |
| Smoking             | 1175 (14.2%)                  | 146 (15%)                 | 0.479   |
| Alcohol consumption | 811 (9.8%)                    | 89 (9.1%)                 | 0.544   |
| Anemia              | 1547 (18.7%)                  | 152 (15.6%)               | 0.019   |
| Hypertension        | 1903 (23%)                    | 189(19.4%)                | 0.011   |
| Diabetes mellitus   | 505 (6.1%)                    | 56 (5.8%)                 | 0.666   |
| ACEI                | 199 (2.4%)                    | 14 (1.4%)                 | 0.065   |
| ARB                 | 116 (1.4%)                    | 14 (1.4%)                 | 0.902   |
| CCB                 | 1142 (13.8%)                  | 103 (10.6%)               | 0.006   |
| Diuretics           | 91 (1.1%)                     | 8 (0.8%)                  | 0.482   |
| ASA grade           |                               |                           | 0.09    |

|                            |              |             |        |
|----------------------------|--------------|-------------|--------|
| I-II                       | 6196 (74.9%) | 753 (77.4%) |        |
| III-V                      | 2077 (25.1%) | 220 (22.6%) |        |
| Anesthesia method          |              |             | <0.001 |
| General anesthesia         | 7363 (89%)   | 907 (93.2%) |        |
| Non-general anesthesia     | 910 (11%)    | 66 (6.8%)   |        |
| Emergency                  | 1406 (17%)   | 119 (12.2%) | <0.001 |
| Surgical grade             |              |             | <0.001 |
| 1                          | 240 (2.9%)   | 19 (2%)     |        |
| 2                          | 2623 (31.7%) | 243 (25%)   |        |
| 3                          | 5080 (61.4%) | 656 (67.4%) |        |
| 4                          | 330 (4%)     | 55 (5.7%)   |        |
| Operative time (min)       |              |             | <0.001 |
| ≤60                        | 1315 (15.9%) | 88 (9%)     |        |
| 61-120                     | 2085 (25.2%) | 204 (21%)   |        |
| 121-180                    | 1919 (23.2%) | 246 (25.3%) |        |
| >180                       | 2954 (35.7%) | 435 (44.7%) |        |
| Intraoperative erythrocyte |              |             | 0.94   |
| Transfusion, mL (%)        |              |             |        |
| <100                       | 6329 (76.5%) | 744 (76.5%) |        |
| 100-600                    | 852 (10.3%)  | 98 (10.1%)  |        |
| 601-1000                   | 496 (6%)     | 56 (5.8%)   |        |
| >1000                      | 596 (7.2%)   | 75 (7.7%)   |        |

|                            |                |                |        |
|----------------------------|----------------|----------------|--------|
| Amount of Blood loss, mL   |                |                |        |
| (%)                        |                |                | 0.003  |
| <100                       | 2507 (30.3%)   | 251 (25.8%)    |        |
| 100–600                    | 4500 (4.4%)    | 559 (57.5%)    |        |
| 601–1000                   | 662 (8%)       | 70 (7.2%)      |        |
| >1000                      | 604 (7.3%)     | 93 (9.6%)      |        |
| Intraoperative Hypotension | 10.8           | 11.9           | 0.297  |
| Vasoactive drugs           | 7.8            | 8.9            | 0.227  |
| Amount of fluid infusion   |                |                |        |
| (10 mL/24 h)               | 1037.07±565.54 | 1159.31±579.85 | <0.001 |
| Amount of fluid out        |                |                |        |
| (10 mL/24 h)               | 410.17±374.16  | 373.74±334.53  | 0.004  |
| AKI                        | 521 (6.3%)     | 39 (4%)        | 0.005  |
| AKI Stages                 |                |                | 0.029  |
| 0                          | 93.7           | 96             |        |
| 1                          | 4.5            | 2.6            |        |
| 2                          | 1              | 0.7            |        |
| 3                          | 0.7            | 0.7            |        |

168 BMI: body mass index, eGFR: estimated glomerular filtration rate, ACEI: angiotensin-converting  
 169 enzyme inhibitors, ARB: angiotensin receptor blockers, CCB: calcium-channel blockers, ASA:  
 170 American Society of Anesthesiologists, Non-general anesthesia include neuraxial anesthesia (spinal  
 171 or epidural) and nerve block anesthesia, AKI: acute kidney injury. Data are expressed as the number

172 of patients (%) or mean  $\pm$  standard deviation (SD). AKI Stages (outcome of postoperative AKI was  
 173 divided into four groups: stage 0, no AKI; stage 1, AKI grade 1; stage 2, AKI grade 2 and stage 3,  
 174 AKI grade 3)

175

176 The incidence of AKI was lower in the parecoxib-administered group (4%) than in the  
 177 group without parecoxib (6.3%,  $p = 0.005$ ). There was no difference in age, BMI,  
 178 estimated glomerular filtration rate (eGFR), sex, smoking, alcohol consumption, presence  
 179 of diabetes mellitus, use of angiotensin-converting enzyme inhibitors (ACEIs), ARBs, or  
 180 diuretics, ASA grade, the incidence of intraoperative erythrocyte transfusion and  
 181 intraoperative hypotension, and use of vasoactive drugs between patients treated with and  
 182 without parecoxib (Table 1). Significant differences between patients treated with and  
 183 without parecoxib are shown in Table 1 (all  $p < 0.05$ ).

184

#### 185 Univariable analysis

186 The factors are shown by the univariable analysis to influence AKI development in  
 187 patients aged 18–60 years who underwent non-cardiac surgery are listed in Table 2.

188

189 Table 2. Univariable analysis of acute kidney injury (AKI)

| Variable   | Statistics        | Univariable       |         |
|------------|-------------------|-------------------|---------|
|            |                   | OR (95% CI)       | p-value |
| Parecoxib  | 0.11 $\pm$ 0.31   | 0.62 (0.45, 0.87) | 0.0050  |
| Age (year) | 44.30 $\pm$ 10.42 | 1.01 (1.00, 1.02) | 0.0737  |

|                            |               |                   |         |
|----------------------------|---------------|-------------------|---------|
| Male                       | 4567 (49.39%) | 1.19 (1.01, 1.42) | 0.0416  |
| BMI                        | 22.90 ± 4.87  | 0.98 (0.95, 1.00) | 0.0396  |
| Smoking                    | 1318 (14.25%) | 1.42 (1.14, 1.77) | 0.0018  |
| Alcohol consumption        | 896 (9.69%)   | 1.46 (1.13, 1.88) | 0.0038  |
| Anemia                     | 1699 (18.38%) | 1.88 (1.55, 2.27) | <0.0001 |
| Hypertension               | 2095 (22.66%) | 2.18 (1.83, 2.61) | <0.0001 |
| Diabetes mellitus          | 561 (6.07%)   | 1.64 (1.22, 2.22) | 0.0011  |
| ACEI                       | 210 (2.27%)   | 1.75 (1.11, 2.77) | 0.0167  |
| ARB                        | 129 (1.40%)   | 1.76 (0.98, 3.14) | 0.0570  |
| CCB                        | 1244 (13.45%) | 1.81 (1.47, 2.24) | <0.0001 |
| Diuretics                  | 96 (1.04%)    | 3.93 (2.36, 6.54) | <0.0001 |
| eGFR                       | 97.94±22.36   | 0.96 (0.96, 0.97) | <0.0001 |
| ASA grade III–V            | 2296 (24.83%) | 2.48 (2.08, 2.95) | <0.0001 |
| Non-general anesthesia     | 980 (10.60%)  | 0.44 (0.30, 0.65) | <0.0001 |
| Emergency                  | 1525 (16.49%) | 1.58 (1.29, 1.94) | <0.0001 |
| Surgical grade 4           | 388 (4.20%)   | 2.12 (1.14, 3.98) | 0.0184  |
| Operative time (min)       |               |                   |         |
| ≤60                        | 1401 (15.15%) | 1                 |         |
| 61–120                     | 2287 (24.74%) | 1.08 (0.79, 1.49) | 0.6200  |
| 121–180                    | 2167 (23.44%) | 1.41 (1.04, 1.92) | 0.0279  |
| >180                       | 3391 (36.68%) | 1.70 (1.28, 2.25) | 0.0003  |
| Intraoperative Hypotension | 1011 (10.93%) | 1.41 (1.10, 1.80) | 0.0060  |

|                                                |               |                   |         |
|------------------------------------------------|---------------|-------------------|---------|
| Vasoactive drugs                               | 735 (7.95%)   | 0.06 (0.03, 0.09) | <0.0001 |
| Intraoperative erythrocyte transfusion, mL (%) |               |                   |         |
| <100                                           | 7074 (76.51%) | 1                 |         |
| 100–600                                        | 950 (10.27%)  | 1.88 (1.46, 2.41) | <0.0001 |
| 601–1000                                       | 550 (5.95%)   | 1.64 (1.18, 2.29) | 0.0035  |
| >1000                                          | 672 (7.27%)   | 3.35 (2.63, 4.27) | <0.0001 |
| Amount of Blood loss, mL (%)                   |               |                   |         |
| <100                                           | 2754 (29.79%) | 1                 |         |
| 100–600                                        | 5063 (54.76%) | 1.23 (0.99, 1.51) | 0.0596  |
| 601–1000                                       | 730 (7.9%)    | 1.79 (1.31, 2.46) | 0.0003  |
| >1000                                          | 699 (7.56%)   | 2.48 (1.85, 3.33) | <0.0001 |

190 OR: odds ratio, BMI: body mass index, ACEI: angiotensin-converting enzyme inhibitors, ARB:  
 191 angiotensin receptor blockers, CCB: calcium-channel blockers, ASA: American Society of  
 192 Anesthesiologists. Non-general anesthesia includes neuraxial anesthesia (spinal or epidural) and nerve  
 193 block anesthesia.

194

195 In the univariable analysis, male sex, smoking, alcohol consumption, anemia,  
 196 hypertension, diabetes mellitus, ACEI use, calcium channel blocker (CCB) use, diuretic  
 197 use, ASA grade III–V, emergency, surgical grade 4, duration of the operation, the  
 198 incidence of intraoperative hypotension and erythrocyte transfusion, and amount of blood

loss were independently associated with an increased risk of postoperative AKI (Table 2).

Parecoxib (OR, 0.62; 95%CI, 0.45–0.87,  $p = 0.005$ ), eGFR (OR, 0.96; 95%CI, 0.96–0.97,  $p < 0.0001$ ), non-general anesthesia (OR, 0.44; 95%CI, 0.30–0.65,  $p < 0.0001$ ) and vasoactive drug use (OR, 0.06; 95%CI, 0.03–0.09,  $p < 0.0001$ ) were independently associated with a decreased risk of postoperative AKI (Table 2). Age (OR, 1.01; 95%CI, 1.00–1.02,  $p = 0.0737$ ), BMI (OR, 0.98; 95%CI, 0.95–1.00,  $p = 0.0396$ ), and ARB use (OR, 1.76; 95%CI, 0.98–3.14,  $p = 0.0570$ ) were not correlated with AKI (Table 2).

#### Multivariable regression analysis

The occurrence of postoperative AKI or AKI Stages was regarded as a dependent variable, and the administration of parecoxib, an independent variable when we performed the stepwise regression analysis (Table 3).

Table 3 Odds ratio of postoperative acute kidney injury (AKI) associated with parecoxib

|            | <b>Model 1</b>        | <b>Model 2</b>        | <b>Model 3</b>        | <b>Model 4</b>        |
|------------|-----------------------|-----------------------|-----------------------|-----------------------|
|            | <b>OR (95% CI)</b>    | <b>OR (95% CI)</b>    | <b>OR (95% CI)</b>    | <b>OR (95% CI)</b>    |
|            | <b><i>p</i>-value</b> | <b><i>p</i>-value</b> | <b><i>p</i>-value</b> | <b><i>p</i>-value</b> |
| AKI        | 0.62 (0.45, 0.87)     | 0.64 (0.46, 0.90)     | 0.63 (0.44, 0.89)     | 0.61(0.43, 0.87)      |
|            | 0.0050                | 0.0096                | 0.0095                | 0.0069                |
| AKI Stages | -0.02 (-0.05,         | -0.02 (-0.05, -       | -0.02 (-0.05, -       | -0.03(-0.05,-         |

---

0.00) 0.0627      0.00) 0.0792      0.00) 0.0517      0.00) 0.0236

---

214 AKI Stages (outcome of postoperative AKI was divided into four groups: stage 0, no AKI; stage 1,

215 AKI grade 1; stage 2, AKI grade 2 and stage 3, AKI grade 3)

216 Model 1: Non-adjusted.

217 Model 2: Adjusted for age, sex, BMI, smoking, alcohol consumption, anemia, hypertension, diabetes

218 mellitus, ACEI, CCB, diuretics, ASA, anesthesia method, emergency, surgical grade, amount of fluid

219 infusion and out, intraoperative erythrocyte transfusion, and amount of blood loss.

220 Model 3: Model 2 plus ARB, eGFR, and operative time.

221 Model 4: Model 3 plus intraoperative hypotension, and vasoactive drugs.

222

223 The risk adjustment models were constructed using logistic stepwise regression. After

224 adjusting for these interference factors, parecoxib was still independently associated with

225 postoperative AKI (OR, 0.61; 95% CI, 0.43–0.87, model 4 in Table 3) or different

226 postoperative AKI stages (OR, -0.03; 95% CI, -0.05–-0.00, model 4 in Table 3).

227

228 Sensitivity analysis

229 Table 4 presented the association between postoperative AKI and parecoxib in the

230 subgroups of eGFR  $<90 \text{ mL} \cdot \text{min}^{-1} \cdot 1.73 \text{ m}^{(2)}^{-1}$ , non-smokers, blood loss  $<1000\text{ml}$ , and

231 intraoperative non-hypotension.

232

233 Table 4 Sensitivity analysis of the association between postoperative acute kidney injury

234 (AKI) and parecoxib



|                              |                      | <b>Model 1</b>     | <b>Model 2</b>     | <b>Model 3</b>     | <b>Model 4</b>     |
|------------------------------|----------------------|--------------------|--------------------|--------------------|--------------------|
|                              |                      | <b>OR (95% CI)</b> | <b>OR (95% CI)</b> | <b>OR (95% CI)</b> | <b>OR (95% CI)</b> |
|                              |                      | <i>p</i> -value    | <i>p</i> -value    | <i>p</i> -value    | <i>p</i> -value    |
|                              | Without<br>parecoxib | Parecoxib          |                    |                    |                    |
| <b>eGFR</b>                  | 1                    | 0.49 (0.31, 0.79)  | 0.54 (0.33, 0.87)  | 0.50 (0.30, 0.84)  | 0.49(0.29,0.82)    |
| <b>&lt;90</b>                |                      | 0.0032             | 0.0119             | 0.0084             | 0.0065             |
| <b>Non-smoker</b>            | 1                    | 0.57 (0.39, 0.84)  | 0.56 (0.37, 0.84)  | 0.56 (0.38, 0.84)  | 0.55(0.37,0.83)    |
|                              |                      | 0.0040             | 0.0046             | 0.0052             | 0.0043             |
| <b>blood loss &lt;1000ml</b> | 1                    | 0.56 (0.39, 0.82)  | 0.57 (0.39, 0.84)  | 0.56 (0.37, 0.83)  | 0.55 (0.37, 0.83)  |
|                              |                      | 0.0027             | 0.0042             | 0.0040             | 0.0037             |
| <b>non-hypotension</b>       | 1                    | 0.60 (0.42, 0.87)  | 0.60 (0.42, 0.87)  | 0.57 (0.38, 0.84)  |                    |
|                              |                      | 0.0064             | 0.0077             | 0.0050             |                    |

235 Model 1: Non-adjusted.

236 Model 2: Adjusted for age, sex, BMI, smoking, alcohol consumption, anemia, hypertension, diabetes

237 mellitus, ACEI, CCB, diuretics, ASA, anesthesia method, emergency, surgical grade, amount of fluid

238 infusion and out, intraoperative erythrocyte transfusion, and amount of blood loss.

239 Model 3: Model 2 plus ARB, eGFR, and operative time

240 Model 4: Model 3 plus intraoperative hypotension, and vasoactive drugs.

241

242 For patients with an eGFR <90 mL·min<sup>-1</sup>·1.73 m<sup>(2)</sup><sup>-1</sup> or who were non-smokers, single-

1  
2  
3  
4 243 dose parecoxib (40 mg or 80 mg) was associated with a lower incidence of postoperative  
5  
6 244 AKI (Table 4). Similar results were obtained with the adjusted models. Postoperative AKI  
7  
8  
9 245 risk also reduced in patients with blood loss <1000ml (OR, 0.55; 95%CI, 0.37-0.83) and  
10  
11 246 non-hypotension (OR, 0.57; 95%CI, 0.38-0.84).  
12  
13  
14 247

## 17 248 **Discussion**

19 249 According to the surgery type and AKI diagnostic criteria, the incidence of  
20  
21  
22 250 postoperative AKI ranges from 1.0% to 31%[13-15], and our study revealed an incidence  
23  
24  
25 251 of 6.06% in the study population of patients aged 18–60 years who underwent non-cardiac  
26  
27 252 surgery. The incidence was similar to that in the recently published data by Nishimoto  
28  
29  
30 253 (6%, non-cardiac surgery; mean age, 63 years)[16]. In our study, the univariable analysis  
31  
32 254 identified male sex, smoking, alcohol consumption, anemia, hypertension, diabetes  
33  
34  
35 255 mellitus, ACEI use, CCB use, diuretic use, eGFR, ASA grade III–V, anesthesia mode,  
36  
37 256 emergency, surgical grade 4, duration of the operation (>120 min), the incidence of  
38  
39  
40 257 intraoperative hypotension, intraoperative erythrocyte transfusion (>100 mL), amount of  
41  
42  
43 258 blood loss (>600 mL), and vasoactive drug use to be associated with AKI, some of which  
44  
45 259 are similar to previously published data by Mathis MR (2020) and Cho E (2014) [17 18].  
46  
47

48 260 However, age and BMI did not correlate with AKI in our study, which is inconsistent  
49  
50  
51 261 with the findings from Wang J's studies[19]. This discrepancy can be explained by the  
52  
53 262 difference in mean age and BMI between the studies, which were both lower in our study  
54  
55  
56 263 population. The results of the sensitivity analysis suggested that single-dose (40 mg or 80  
57  
58 264 mg) parecoxib might have potential protective effects against postoperative AKI in  
59  
60

1  
2  
3  
4 265 differentially ranked AKI. eGFR  $<90 \text{ mL} \cdot \text{min}^{-1} \cdot 1.73 \text{ m}^{(2)}^{-1}$  represented the population  
5  
6 266 with preoperative glomerular filtration impairment, while non-hypertension and blood-  
7  
8  
9 267 loss  $<1000 \text{ ml}$ , represented people with relatively stable intraoperative circulation and  
10  
11 268 relatively good renal perfusion pressure. The subgroup analysis showed parecoxib might  
12  
13  
14 269 reduce the AKI risk in these patients.

15  
16  
17 270 Numerous studies have investigated the association between NSAIDs and AKI[10 20].  
18  
19 271 An updated Cochrane systematic review and meta-analysis published by Bell S in 2018  
20  
21 272 indicated that NSAIDs have uncertain effects on the rate of AKI and may slightly increase  
22  
23 273 serum creatinine in patients with normal kidney function following surgery[20]. In  
24  
25 274 another meta-analysis (Ungprasert P, 2015), a significant risk of AKI was observed with  
26  
27 275 most traditional NSAIDs but not with two COX-2 specific inhibitors (rofecoxib and  
28  
29 276 celecoxib) [10]. A pooled analysis of 28 randomized clinical trials investigating the safety  
30  
31 277 of parecoxib for the management of postoperative pain showed that its associated risk of  
32  
33 278 renal failure and impairment was 1%, similar to that with the placebo (0.9%)[21].  
34  
35  
36  
37  
38  
39

40 279 However, our study indicated that intraoperative single-dose parecoxib (40 mg or 80  
41  
42 280 mg) might provide potential protective effects against postoperative AKI in patients aged  
43  
44 281 18–60 years who underwent non-cardiac surgery. Moreover, this is not the first time a  
45  
46 282 renoprotective effect has been postulated for parecoxib. For example, the study of Takaku  
47  
48 283 M et al. also showed that a single-dose of parecoxib (20 mg/kg) reduced tubular renal  
49  
50 284 injury and serum inflammatory cytokines level (interleukin (IL)- $1\alpha$ , IL- $\beta$ , IL6, and tumor  
51  
52 285 necrosis factor (TNF)- $\alpha$ ) in an ischemic rat model[22]. Moreover, several animal  
53  
54 286 studies(Takaku M 2018, Feitoza CQ 2005, Feitoza CQ 2004, Candelario-Jalil E 2007)  
55  
56  
57  
58  
59  
60

1  
2  
3  
4 287 have suggested that pretreatment with COX-2 inhibitors improved outcomes in function  
5  
6 288 and histology in not only the kidney but also other organs after ischemia[22-25]. To the  
7  
8  
9 289 best of our knowledge, this is the first clinical report to suggest that single-dose (40 mg  
10  
11 290 or 80 mg) parecoxib may be renoprotective in patients aged 18–60 years who underwent  
12  
13  
14 291 non-cardiac surgery.

15  
16  
17 292 The mechanism by which parecoxib decreases the risk of postoperative AKI is  
18  
19 293 unknown. However, one possible underlying mechanism is likely related to inflammation.  
20  
21  
22 294 A previous study by Murashima M et al. showed that inflammation is a predictor of  
23  
24 295 postoperative AKI and a mediator of increased mortality after AKI in non-cardiac surgery  
25  
26  
27 296 [26]. However, perioperative parecoxib reduced local and systemic inflammatory  
28  
29  
30 297 cytokines postoperatively[27 28]. Another possible mechanism is associated with  
31  
32  
33 298 hemodynamic change. COX-1 contributes to controlling renal GFR, whereas COX-2 is  
34  
35 299 involved in sodium and water excretion[7]. COX-2 inhibitors are associated with mild  
36  
37  
38 300 hypertension owing to modest sodium retention in the first few days of therapy[29]. The  
39  
40  
41 301 renoprotective mechanism of parecoxib may be related to its anti-inflammatory effects  
42  
43 302 and sodium regulation.

44  
45 303 Our study had some limitations that are worth mentioning. First, this was a  
46  
47  
48 304 retrospective single-center observational study; thus, it may have had some selection bias.  
49  
50  
51 305 Second, the timing of the serum creatinine measurement was based on clinical discretion;  
52  
53  
54 306 thus, it may vary with different doctors. Third, we simply chose patients aged 18-60 years  
55  
56  
57 307 who underwent non-cardiac surgery as the target to research. Fourthly, due to the nature  
58  
59 308 of the retrospective study, some unknown or unmeasured confounders, and those  
60

1  
2  
3  
4 309 excluded patients who had missing data may interfere with the outcomes. Therefore, our  
5  
6 310 results should be extrapolated cautiously.  
7  
8

9 311

## 11 312 **Conclusions**

13  
14 313 In conclusion, in non-cardiac surgery patients, a single dose of parecoxib (40 mg or 80  
15  
16 314 mg) may be associated with a modest reduction of postoperative AKI in those aged 18–  
17  
18 315 60 years. However, these short-term effects may not represent the benefit of this drug in  
19  
20 316 the long term. Furthermore, more comprehensive studies are needed to confirm the effects  
21  
22 317 of parecoxib on the risk of postoperative AKI.  
23  
24

25 318

## 27 319 **Figure legends**

28  
29  
30 320 Fig 1. Enrollment of patients undergoing non-cardiac surgery. The numbers in brackets  
31  
32 321 represent patients excluded for the reasons described earlier.  
33  
34

35 322

## 36 323 **Acknowledgments**

37 324 We thank Dr. Xing Liu for the technical consultation.  
38  
39

40 325

## 41 326 **Author's Contributions**

42  
43 327 Yongzhong Tang helped in designing the study, analyzing and interpreting the data, and  
44  
45 328 drafting and revising the manuscript. Pingping Zeng and Yan Liao helped in collecting,  
46  
47 329 analyzing and interpreting the data, and drafting and revising the manuscript. Zheng Qin,  
48  
49 330 Hao Zhang and Bo Li helped in analyzing and interpreting the data. Wen Ouyang helped  
50  
51  
52  
53  
54  
55  
56  
57  
58  
59  
60

1  
2  
3  
4 331 in Supervising, Funding acquisition and drafting and revising the manuscript. Dan Li  
5  
6 332 helped in designing the study, analyzing and interpreting the data, and drafting and  
7  
8  
9 333 revising the manuscript.  
10

11 334

12  
13  
14 335 **Funding:** This work was supported by the National Key R&D Program of China (grant  
15  
16 336 number 2018YFC2001800), Project of Health and Health Commission of Hunan  
17  
18  
19 337 Province (grant number 20201802), Hunan Province Key Laboratory Project (grant  
20  
21  
22 338 number 2018TP1009), and the Research and Innovation Funds from Xiangya Bigdata  
23  
24  
25 339 Foundation of Central South University.  
26

27 340

28  
29  
30 341 **Competing interests:** The authors declare they have no competing interests.  
31

32 342

33  
34  
35 343 **Patient Consent for publication:** Not applicable.  
36

37 344

38  
39  
40 345 **Ethics approval:** This study was approved by the ethics committee of the third Xiangya  
41  
42 346 hospital of Central South University (2020S264). Because of the observational nature of  
43  
44  
45 347 the study, informed consent was waived.  
46

47  
48 348

49  
50 349 **Data sharing statement:** The data used and analyzed in this study are available from  
51  
52  
53 350 the corresponding author on reasonable request.  
54  
55  
56  
57  
58  
59  
60

---

**REFERENCES**

1. Romagnoli S, Ricci Z. Postoperative acute kidney injury. *Minerva anesthesiologica* 2015;**81**(6):684-96
2. Ortega-Loubon C, Fernandez-Molina M, Carrascal-Hinojal Y, et al. Cardiac surgery-associated acute kidney injury. *Annals of cardiac anaesthesia* 2016;**19**(4):687-98 doi: 10.4103/0971-9784.191578[published Online First: Epub Date]].
3. Bell S, Ross VC, Zealley KA, et al. Management of post-operative acute kidney injury. *QJM : monthly journal of the Association of Physicians* 2017;**110**(11):695-700 doi: 10.1093/qjmed/hcw175[published Online First: Epub Date]].
4. Iyigun M, Aykut G, Tosun M, et al. Perioperative risk factors of acute kidney injury after non-cardiac surgery: A multicenter, prospective, observational study in patients with low grade American Society of Anesthesiologists physical status. *American journal of surgery* 2019;**218**(3):457-61 doi: 10.1016/j.amjsurg.2019.01.031[published Online First: Epub Date]].
5. Turan A, Cohen B, Adegboye J, et al. Mild Acute Kidney Injury after Noncardiac Surgery Is Associated with Long-term Renal Dysfunction: A Retrospective Cohort Study. *Anesthesiology* 2020 doi: 10.1097/ALN.0000000000003109[published Online First: Epub Date]].
6. Cuniberti B, Odore R, Barbero R, et al. In vitro and ex vivo pharmacodynamics of selected non-steroidal anti-inflammatory drugs in equine whole blood. *Veterinary journal* 2012;**191**(3):327-33 doi: 10.1016/j.tvjl.2011.03.016[published Online First: Epub Date]].
7. Lucas GNC, Leitao ACC, Alencar RL, et al. Pathophysiological aspects of nephropathy caused by non-steroidal anti-inflammatory drugs. *Jornal brasileiro de nefrologia : 'orgao oficial de Sociedades Brasileira e Latino-Americana de Nefrologia* 2019;**41**(1):124-30 doi: 10.1590/2175-8239-JBN-2018-0107[published Online First: Epub Date]].
8. Mitchell JA, Warner TD. COX isoforms in the cardiovascular system: understanding the activities of non-steroidal anti-inflammatory drugs. *Nature reviews Drug discovery* 2006;**5**(1):75-86 doi: 10.1038/nrd1929[published Online First: Epub Date]].
9. Sriperumbuduri S, Hiremath S. The case for cautious consumption: NSAIDs in chronic kidney disease. *Current opinion in nephrology and hypertension* 2019;**28**(2):163-70 doi: 10.1097/MNH.0000000000000473[published Online First: Epub Date]].
10. Ungprasert P, Cheungpasitporn W, Crowson CS, et al. Individual non-steroidal anti-inflammatory drugs and risk of acute kidney injury: A systematic review and meta-analysis of observational studies. *European journal of internal medicine* 2015;**26**(4):285-91 doi: 10.1016/j.ejim.2015.03.008[published Online First: Epub Date]].
11. Amabile CM, Spencer AP. Parecoxib for parenteral analgesia in postsurgical patients. *The Annals of pharmacotherapy* 2004;**38**(5):882-6 doi: 10.1345/aph.1D283[published Online First: Epub Date]].
12. Khwaja A. KDIGO Clinical Practice Guidelines for Acute Kidney Injury. *Nephron Clin Pract* 2012;**120**(4):C179-C84 doi: 10.1159/000339789[published Online First: Epub Date]].
13. Kim M, Brady JE, Li G. Variations in the risk of acute kidney injury across intraabdominal surgery procedures. *Anesthesia and analgesia* 2014;**119**(5):1121-32 doi: 10.1213/ANE.0000000000000425[published Online First: Epub Date]].
14. Biteker M, Dayan A, Tekkesin AI, et al. Incidence, risk factors, and outcomes of perioperative acute kidney injury in noncardiac and nonvascular surgery. *American journal of surgery* 2014;**207**(1):53-9 doi: 10.1016/j.amjsurg.2013.04.006[published Online First: Epub Date]].
15. Vaara ST, Bellomo R. Postoperative renal dysfunction after noncardiac surgery. *Current opinion in*



- critical care 2017;**23**(5):440-46 doi: 10.1097/MCC.000000000000439[published Online First: Epub Date]].
16. Nishimoto M, Murashima M, Kokubu M, et al. Positive association between intra-operative fluid balance and post-operative acute kidney injury in non-cardiac surgery: the NARA-AKI cohort study. *Journal of nephrology* 2020;**33**(3):561-68 doi: 10.1007/s40620-019-00688-x[published Online First: Epub Date]].
17. Mathis MR, Naik BI, Freundlich RE, et al. Preoperative Risk and the Association between Hypotension and Postoperative Acute Kidney Injury. *Anesthesiology* 2019 doi: 10.1097/ALN.0000000000003063[published Online First: Epub Date]].
18. Cho E, Kim SC, Kim MG, et al. The incidence and risk factors of acute kidney injury after hepatobiliary surgery: a prospective observational study. *Bmc Nephrol* 2014;**15** doi: Artn 169 10.1186/1471-2369-15-169[published Online First: Epub Date]].
19. Wang J, Yu W, Zhai G, et al. Independent risk factors for postoperative AKI and the impact of the AKI on 30-day postoperative outcomes in patients with type A acute aortic dissection: an updated meta-analysis and meta-regression. *Journal of thoracic disease* 2018;**10**(5):2590-98 doi: 10.21037/jtd.2018.05.47[published Online First: Epub Date]].
20. Bell S, Rennie T, Marwick CA, et al. Effects of peri-operative nonsteroidal anti-inflammatory drugs on post-operative kidney function for adults with normal kidney function. *The Cochrane database of systematic reviews* 2018;**11**:CD011274 doi: 10.1002/14651858.CD011274.pub2[published Online First: Epub Date]].
21. Schug SA, Parsons B, Li C, et al. The safety profile of parecoxib for the treatment of postoperative pain: a pooled analysis of 28 randomized, double-blind, placebo-controlled clinical trials and a review of over 10 years of postauthorization data. *Journal of pain research* 2017;**10**:2451-59 doi: 10.2147/JPR.S136052[published Online First: Epub Date]].
22. Takaku M, da Silva AC, Iritsu NI, et al. Effects of a Single Dose of Parecoxib on Inflammatory Response and Ischemic Tubular Injury Caused by Hemorrhagic Shock in Rats. *Pain research and treatment* 2018;**2018**:8375746 doi: 10.1155/2018/8375746[published Online First: Epub Date]].
23. Feitoza CQ, Camara NO, Pinheiro HS, et al. Cyclooxygenase 1 and/or 2 blockade ameliorates the renal tissue damage triggered by ischemia and reperfusion injury. *International immunopharmacology* 2005;**5**(1):79-84 doi: 10.1016/j.intimp.2004.09.024[published Online First: Epub Date]].
24. Feitoza CQ, Sanders H, Cenedeze M, et al. Pretreatment with indomethacin protects from acute renal failure following ischemia-reperfusion injury. *Transplant P* 2002;**34**(7):2979-80 doi: Pii S0041-1345(02)03507-8 Doi 10.1016/S0041-1345(02)03507-8[published Online First: Epub Date]].
25. Candelario-Jalil E, Gonzalez-Falcon A, Garcia-Cabrera M, et al. Post-ischaemic treatment with the cyclooxygenase-2 inhibitor nimesulide reduces blood-brain barrier disruption and leukocyte infiltration following transient focal cerebral ischaemia in rats. *Journal of neurochemistry* 2007;**100**(4):1108-20 doi: 10.1111/j.1471-4159.2006.04280.x[published Online First: Epub Date]].
26. Murashima M, Nishimoto M, Kokubu M, et al. Inflammation as a predictor of acute kidney injury and mediator of higher mortality after acute kidney injury in non-cardiac surgery. *Scientific reports* 2019;**9**(1):20260 doi: 10.1038/s41598-019-56615-4[published Online First: Epub Date]].
27. Chong SJ, Wong YC, Wu J, et al. Parecoxib reduces systemic inflammation and acute lung injury in burned animals with delayed fluid resuscitation. *International journal of inflammation*



- 1  
2  
3 438 2014;**2014**:972645 doi: 10.1155/2014/972645[published Online First: Epub Date]].
- 4 439 28. Zhu Y, Wang S, Wu H, et al. Effect of perioperative parecoxib on postoperative pain and local  
5 440 inflammation factors PGE2 and IL-6 for total knee arthroplasty: a randomized, double-blind,  
6 441 placebo-controlled study. *European journal of orthopaedic surgery & traumatology : orthopedie*  
7 442 *traumatologie* 2014;**24**(3):395-401 doi: 10.1007/s00590-013-1203-4[published Online First:  
8 443 Epub Date]].
- 9 444 29. Hegazy R, Alashhab M, Amin M. Cardiorenal Effects of Newer NSAIDs (Celecoxib) versus Classic NSAIDs  
10 445 (Ibuprofen) in Patients with Arthritis. *Journal of toxicology* 2011;**2011**:862153 doi:  
11 446 10.1155/2011/862153[published Online First: Epub Date]].
- 12  
13  
14  
15  
16 447

17  
18  
19  
20  
21  
22  
23  
24  
25  
26  
27  
28  
29  
30  
31  
32  
33  
34  
35  
36  
37  
38  
39  
40  
41  
42  
43  
44  
45  
46  
47  
48  
49  
50  
51  
52  
53  
54  
55  
56  
57  
58  
59  
60

For peer review only

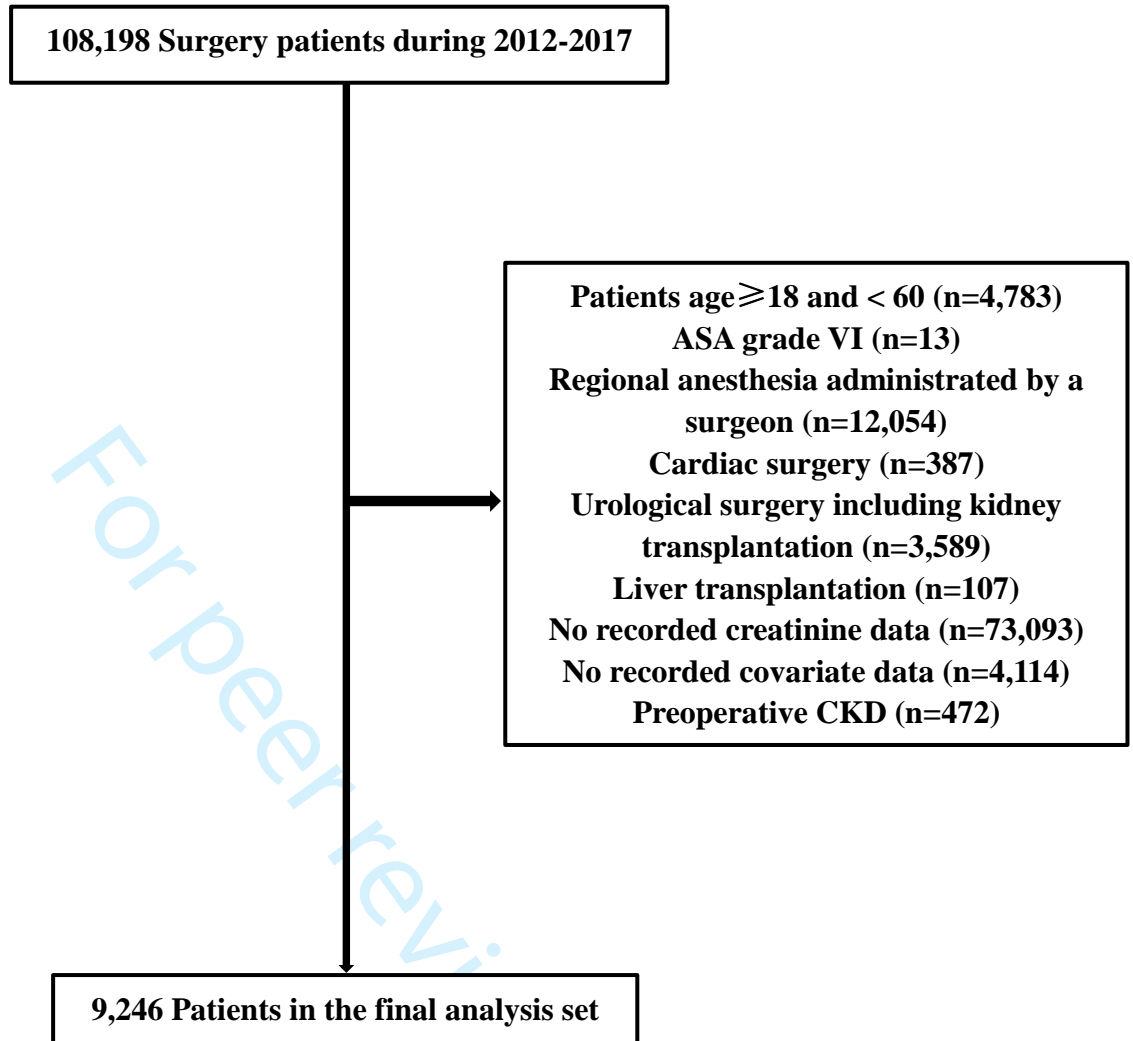

**Fig 1**

**Supplemental Table 1.** Baseline characteristics of patients aged 18–60 years with and without acute kidney injury (AKI)

| Clinical features   | without AKI<br>(n=8686) | With AKI<br>(n=560) | p-value |
|---------------------|-------------------------|---------------------|---------|
| Age (years)         | 44.25±10.43             | 45.06±10.18         | 0.074   |
| BMI                 | 22.93±4.93              | 22.54±3.83          | 0.07    |
| eGFR                | 101.98±16.38            | 94.41±19.78         | <0.001  |
| Male                | 4267 (49.13%)           | 300 (53.57%)        | 0.041   |
| Smoking             | 1213 (13.97%)           | 105 (18.75%)        | 0.002   |
| Alcohol consumption | 822 (9.46%)             | 74 (13.21%)         | 0.004   |
| Anemia              | 1538 (17.71%)           | 161 (28.75%)        | <0.001  |
| Hypertension        | 1884 (21.69%)           | 211 (37.68%)        | <0.001  |
| Diabetes mellitus   | 509 (5.86%)             | 52 (9.29%)          | <0.001  |
| ACEI                | 189 (2.18%)             | 21 (3.75%)          | 0.015   |
| ARB                 | 116 (1.34%)             | 13 (2.32%)          | 0.054   |
| CCB                 | 1125 (12.95%)           | 119 (21.25%)        | <0.001  |
| Diuretics           | 77 (0.89%)              | 19 (3.39%)          | <0.001  |
| ASA grade           |                         |                     | <0.001  |
| I–II                | 6633 (76.36%)           | 317 (56.61%)        |         |
| III–V               | 2053 (23.64%)           | 243 (43.39%)        |         |
| Anesthesia method   |                         |                     | <0.001  |

|                            |               |              |        |
|----------------------------|---------------|--------------|--------|
| General anesthesia         | 7735 (89.05%) | 531 (94.82%) |        |
| Non-general anesthesia     | 951 (10.95%)  | 29 (5.18%)   |        |
| Emergency                  | 1395 (16.06%) | 130 (23.21%) | <0.001 |
| Surgical Grade             |               |              | <0.001 |
| 1                          | 245 (2.82%)   | 14 (2.50%)   |        |
| 2                          | 2746 (31.61%) | 118 (21.07%) |        |
| 3                          | 5349 (61.58%) | 386 (68.93%) |        |
| 4                          | 346 (3.98%)   | 42 (7.50%)   |        |
| Operative time (min)       |               |              | <0.001 |
| ≤60                        | 1338 (15.4%)  | 63 (11.25%)  |        |
| 61–120                     | 2176 (25.05%) | 111 (19.82%) |        |
| 121–180                    | 2032 (23.39%) | 135 (24.11%) |        |
| >180                       | 3140 (36.15%) | 251 (44.82%) |        |
| Intraoperative erythrocyte |               |              | <0.001 |
| Transfusion, mL (%)        |               |              |        |
| <100                       | 6735 (77.54)  | 339 (60.54)  |        |
| 100–600                    | 868 (9.99)    | 82 (14.64)   |        |
| 601–1000                   | 508 (5.85)    | 42 (7.50)    |        |
| >1000                      | 575 (6.62)    | 97 (17.32)   |        |
| Amount of Blood loss, mL   |               |              | <0.001 |
| (%)                        |               |              |        |
| <100                       | 2623 (30.20)  | 131 (23.39)  |        |

|                                          |                             |                              |        |
|------------------------------------------|-----------------------------|------------------------------|--------|
| 100–600                                  | 4771 (54.93)                | 292 (52.14)                  |        |
| 601–1000                                 | 670 (7.71)                  | 60 (10.71)                   |        |
| >1000                                    | 622 (7.16)                  | 77 (13.75)                   |        |
| Amount of fluid infusion<br>(10 mL/24 h) | 916.67 (625.00–<br>1432.29) | 1125.00 (703.12–<br>1604.17) | <0.001 |
| Amount of fluid out<br>(10 mL/24 h)      | 333.33 (145.83–541.67)      | 375.00 (208.33–<br>687.50)   | <0.001 |
| Intraoperative Hypotension               | 930 (10.71%)                | 81 (14.46%)                  | 0.006  |
| Vasoactive drugs                         | 664 (7.64%)                 | 71 (12.68%)                  | <0.001 |
| Parecoxib                                | 934 (10.75%)                | 39 (6.96%)                   | 0.005  |
| Admission to ICU                         | 376 (4.33%)                 | 57 (10.18%)                  | <0.001 |
| Death                                    | 32 (0.37%)                  | 26 (4.64%)                   | <0.001 |

AKI: acute kidney injury, BMI: body mass index, eGFR: estimated glomerular filtration rate, ACEI: angiotensin-converting enzyme inhibitors, ARB: angiotensin receptor blockers, CCB: calcium-channel blockers, ASA: American Society of Anesthesiologists, Non-general anesthesia include neuraxial anesthesia (spinal or epidural) and nerve block anesthesia, ICU: intensive care unit. Data are expressed as the number of patients (%) or mean  $\pm$  standard deviation (SD).

**STROBE 2007 (v4) Statement—Checklist of items that should be included in reports of *cohort studies***

| Section/Topic                | Item # | Recommendation                                                                                                                                                                       | Reported on page # |
|------------------------------|--------|--------------------------------------------------------------------------------------------------------------------------------------------------------------------------------------|--------------------|
| <b>Title and abstract</b>    | 1      | (a) Indicate the study's design with a commonly used term in the title or the abstract                                                                                               | 1-2                |
|                              |        | (b) Provide in the abstract an informative and balanced summary of what was done and what was found                                                                                  | 2                  |
| <b>Introduction</b>          |        |                                                                                                                                                                                      |                    |
| Background/rationale         | 2      | Explain the scientific background and rationale for the investigation being reported                                                                                                 | 4-5                |
| Objectives                   | 3      | State specific objectives, including any prespecified hypotheses                                                                                                                     | 5                  |
| <b>Methods</b>               |        |                                                                                                                                                                                      |                    |
| Study design                 | 4      | Present key elements of study design early in the paper                                                                                                                              | 5                  |
| Setting                      | 5      | Describe the setting, locations, and relevant dates, including periods of recruitment, exposure, follow-up, and data collection                                                      | 5-6                |
| Participants                 | 6      | (a) Give the eligibility criteria, and the sources and methods of selection of participants. Describe methods of follow-up                                                           | 5-6                |
|                              |        | (b) For matched studies, give matching criteria and number of exposed and unexposed                                                                                                  | -                  |
| Variables                    | 7      | Clearly define all outcomes, exposures, predictors, potential confounders, and effect modifiers. Give diagnostic criteria, if applicable                                             | 6                  |
| Data sources/<br>measurement | 8*     | For each variable of interest, give sources of data and details of methods of assessment (measurement). Describe comparability of assessment methods if there is more than one group | 6                  |
| Bias                         | 9      | Describe any efforts to address potential sources of bias                                                                                                                            | 5                  |
| Study size                   | 10     | Explain how the study size was arrived at                                                                                                                                            | 5                  |
| Quantitative variables       | 11     | Explain how quantitative variables were handled in the analyses. If applicable, describe which groupings were chosen and why                                                         | 7                  |
| Statistical methods          | 12     | (a) Describe all statistical methods, including those used to control for confounding                                                                                                | 6-7                |
|                              |        | (b) Describe any methods used to examine subgroups and interactions                                                                                                                  | 7                  |
|                              |        | (c) Explain how missing data were addressed                                                                                                                                          | 6-7                |
|                              |        | (d) If applicable, explain how loss to follow-up was addressed                                                                                                                       | 7                  |
|                              |        | (e) Describe any sensitivity analyses                                                                                                                                                | 7                  |
| <b>Results</b>               |        |                                                                                                                                                                                      |                    |

|                          |     |                                                                                                                                                                                                              |       |
|--------------------------|-----|--------------------------------------------------------------------------------------------------------------------------------------------------------------------------------------------------------------|-------|
| Participants             | 13* | (a) Report numbers of individuals at each stage of study—eg numbers potentially eligible, examined for eligibility, confirmed eligible, included in the study, completing follow-up, and analysed            | 7     |
|                          |     | (b) Give reasons for non-participation at each stage                                                                                                                                                         | 7     |
|                          |     | (c) Consider use of a flow diagram                                                                                                                                                                           | 7     |
| Descriptive data         | 14* | (a) Give characteristics of study participants (eg demographic, clinical, social) and information on exposures and potential confounders                                                                     | 8     |
|                          |     | (b) Indicate number of participants with missing data for each variable of interest                                                                                                                          | 7     |
|                          |     | (c) Summarise follow-up time (eg, average and total amount)                                                                                                                                                  | 7     |
| Outcome data             | 15* | Report numbers of outcome events or summary measures over time                                                                                                                                               | 8-11  |
| Main results             | 16  | (a) Give unadjusted estimates and, if applicable, confounder-adjusted estimates and their precision (eg, 95% confidence interval). Make clear which confounders were adjusted for and why they were included | 14-17 |
|                          |     | (b) Report category boundaries when continuous variables were categorized                                                                                                                                    | 8-17  |
|                          |     | (c) If relevant, consider translating estimates of relative risk into absolute risk for a meaningful time period                                                                                             | -     |
| Other analyses           | 17  | Report other analyses done—eg analyses of subgroups and interactions, and sensitivity analyses                                                                                                               | 18-19 |
| <b>Discussion</b>        |     |                                                                                                                                                                                                              |       |
| Key results              | 18  | Summarise key results with reference to study objectives                                                                                                                                                     | 20-22 |
| <b>Limitations</b>       |     |                                                                                                                                                                                                              |       |
| Interpretation           | 20  | Give a cautious overall interpretation of results considering objectives, limitations, multiplicity of analyses, results from similar studies, and other relevant evidence                                   | 22    |
| Generalisability         | 21  | Discuss the generalisability (external validity) of the study results                                                                                                                                        | -     |
| <b>Other information</b> |     |                                                                                                                                                                                                              |       |
| Funding                  | 22  | Give the source of funding and the role of the funders for the present study and, if applicable, for the original study on which the present article is based                                                | 23    |

\*Give information separately for cases and controls in case-control studies and, if applicable, for exposed and unexposed groups in cohort and cross-sectional studies.

**Note:** An Explanation and Elaboration article discusses each checklist item and gives methodological background and published examples of transparent reporting. The STROBE checklist is best used in conjunction with this article (freely available on the Web sites of PLoS Medicine at <http://www.plosmedicine.org/>, Annals of Internal Medicine at <http://www.annals.org/>, and Epidemiology at <http://www.epidem.com/>). Information on the STROBE Initiative is available at [www.strobe-statement.org](http://www.strobe-statement.org).
