# Supplementary material for: Correlation between perioperative parecoxib use and postoperative acute kidney injury in patients undergoing non-cardiac surgery: a retrospective cohort analysis
Source: PubMed Central journal article supplement — BMJ Open. 2021 Aug 24;11(8):e047840. doi: 10.1136/bmjopen-2020-047840 (PMC8388276; doi:10.1136/bmjopen-2020-047840), 2021-08-24
Supplement: bmjopen-2020-047840supp001.pdf [file bmjopen-2020-047840supp001.pdf]

**Supplemental Table 1.** Baseline characteristics of patients aged 18–60 years with and without acute kidney injury (AKI)

| Clinical features   | without AKI<br>(n=8686) | With AKI<br>(n=560) | p-value |
|---------------------|-------------------------|---------------------|---------|
| Age (years)         | 44.25±10.43             | 45.06±10.18         | 0.074   |
| BMI                 | 22.93±4.93              | 22.54±3.83          | 0.07    |
| eGFR                | 101.98±16.38            | 94.41±19.78         | <0.001  |
| Male                | 4267 (49.13%)           | 300 (53.57%)        | 0.041   |
| Smoking             | 1213 (13.97%)           | 105 (18.75%)        | 0.002   |
| Alcohol consumption | 822 (9.46%)             | 74 (13.21%)         | 0.004   |
| Anemia              | 1538 (17.71%)           | 161 (28.75%)        | <0.001  |
| Hypertension        | 1884 (21.69%)           | 211 (37.68%)        | <0.001  |
| Diabetes mellitus   | 509 (5.86%)             | 52 (9.29%)          | <0.001  |
| ACEI                | 189 (2.18%)             | 21 (3.75%)          | 0.015   |
| ARB                 | 116 (1.34%)             | 13 (2.32%)          | 0.054   |
| CCB                 | 1125 (12.95%)           | 119 (21.25%)        | <0.001  |
| Diuretics           | 77 (0.89%)              | 19 (3.39%)          | <0.001  |
| ASA grade           |                         |                     | <0.001  |
| I–II                | 6633 (76.36%)           | 317 (56.61%)        |         |
| III–V               | 2053 (23.64%)           | 243 (43.39%)        |         |
| Anesthesia method   |                         |                     | <0.001  |

|                            |               |              |        |
|----------------------------|---------------|--------------|--------|
| General anesthesia         | 7735 (89.05%) | 531 (94.82%) |        |
| Non-general anesthesia     | 951 (10.95%)  | 29 (5.18%)   |        |
| Emergency                  | 1395 (16.06%) | 130 (23.21%) | <0.001 |
| Surgical Grade             |               |              | <0.001 |
| 1                          | 245 (2.82%)   | 14 (2.50%)   |        |
| 2                          | 2746 (31.61%) | 118 (21.07%) |        |
| 3                          | 5349 (61.58%) | 386 (68.93%) |        |
| 4                          | 346 (3.98%)   | 42 (7.50%)   |        |
| Operative time (min)       |               |              | <0.001 |
| ≤60                        | 1338 (15.4%)  | 63 (11.25%)  |        |
| 61–120                     | 2176 (25.05%) | 111 (19.82%) |        |
| 121–180                    | 2032 (23.39%) | 135 (24.11%) |        |
| >180                       | 3140 (36.15%) | 251 (44.82%) |        |
| Intraoperative erythrocyte |               |              | <0.001 |
| Transfusion, mL (%)        |               |              |        |
| <100                       | 6735 (77.54)  | 339 (60.54)  |        |
| 100–600                    | 868 (9.99)    | 82 (14.64)   |        |
| 601–1000                   | 508 (5.85)    | 42 (7.50)    |        |
| >1000                      | 575 (6.62)    | 97 (17.32)   |        |
| Amount of Blood loss, mL   |               |              | <0.001 |
| (%)                        |               |              |        |
| <100                       | 2623 (30.20)  | 131 (23.39)  |        |

|                                          |                             |                              |        |
|------------------------------------------|-----------------------------|------------------------------|--------|
| 100–600                                  | 4771 (54.93)                | 292 (52.14)                  |        |
| 601–1000                                 | 670 (7.71)                  | 60 (10.71)                   |        |
| >1000                                    | 622 (7.16)                  | 77 (13.75)                   |        |
| Amount of fluid infusion<br>(10 mL/24 h) | 916.67 (625.00–<br>1432.29) | 1125.00 (703.12–<br>1604.17) | <0.001 |
| Amount of fluid out<br>(10 mL/24 h)      | 333.33 (145.83–541.67)      | 375.00 (208.33–<br>687.50)   | <0.001 |
| Intraoperative Hypotension               | 930 (10.71%)                | 81 (14.46%)                  | 0.006  |
| Vasoactive drugs                         | 664 (7.64%)                 | 71 (12.68%)                  | <0.001 |
| Parecoxib                                | 934 (10.75%)                | 39 (6.96%)                   | 0.005  |
| Admission to ICU                         | 376 (4.33%)                 | 57 (10.18%)                  | <0.001 |
| Death                                    | 32 (0.37%)                  | 26 (4.64%)                   | <0.001 |

AKI: acute kidney injury, BMI: body mass index, eGFR: estimated glomerular filtration rate, ACEI: angiotensin-converting enzyme inhibitors, ARB: angiotensin receptor blockers, CCB: calcium-channel blockers, ASA: American Society of Anesthesiologists, Non-general anesthesia include neuraxial anesthesia (spinal or epidural) and nerve block anesthesia, ICU: intensive care unit. Data are expressed as the number of patients (%) or mean  $\pm$  standard deviation (SD).
